# Supplementary material for: Endogenous Purification of NR4A2 (Nurr1) Identified Poly(ADP-Ribose) Polymerase 1 as a Prime Coregulator in Human Adrenocortical H295R Cells
Source: MDPI journal article supplement (doi:10.3390/ijms19051406), 2018-05-08
Supplement: s1 [file s1]

# **Supplementary Materials: Endogenous Purification of NR4A2 (Nurr1) Identified Poly(ADP-Ribose) Polymerase 1 as a Prime Coregulator in Human Adrenocortical H295R Cells**

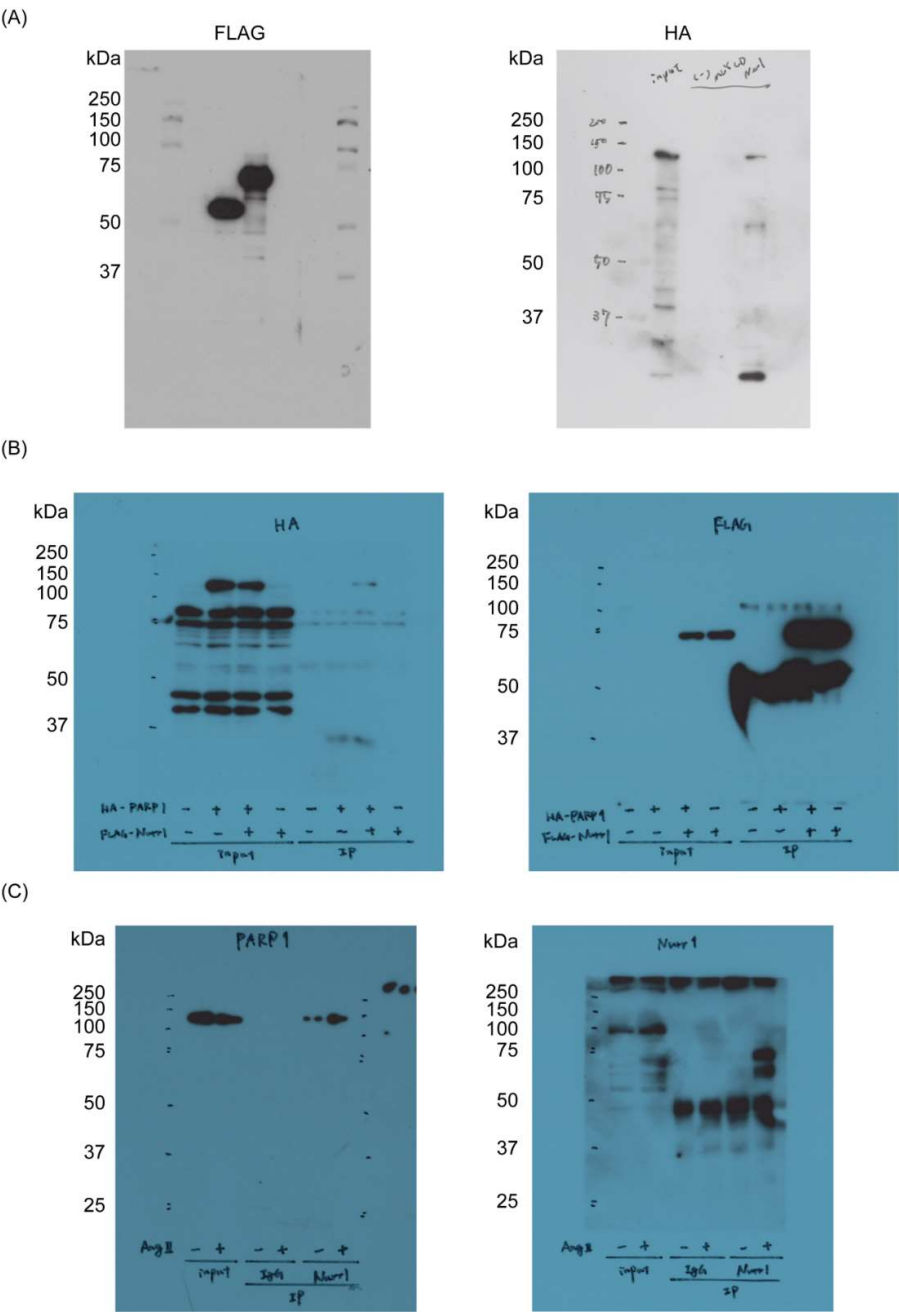

**Figure S1.** Uncropped scans of western blots used in Figure 2. (A) Uncropped scans of Figure 2A. (B) Uncropped scans of Figure 2B. (C) Uncropped scans of Figure 2C. Molecular weights of marker proteins are indicated on the left side.

**Table S1:** A full list of identified proteins in Nurr1 RIME
