# Supplementary material for: Endogenous Purification of NR4A2 (Nurr1) Identified Poly(ADP-Ribose) Polymerase 1 as a Prime Coregulator in Human Adrenocortical H295R Cells
Source: Int J Mol Sci. 2018 May 8;19(5):1406. doi: 10.3390/ijms19051406 (PMC5983848; doi:10.3390/ijms19051406)
Supplement: Supplementary file 1 [file ijms-19-01406-s001.zip › Table S1.xlsx]

## Sheet: E-20
Accession	Description	ΣCoverage	Σ# Proteins	Σ# Unique Peptides	Σ# Peptides	Σ# PSMs	Score Replicate1	Coverage Replicate1	# Peptides Replicate1	# PSM Replicate1	Score Replicate2	Coverage Replicate2	# Peptides Replicate2	# PSM Replicate2	# AAs	MW [kDa]	calc. pI
P09874	Poly [ADP-ribose] polymerase 1 OS=Homo sapiens GN=PARP1 PE=1 SV=4 - [PARP1_HUMAN]	21.7	1	16	16	45	849.037	21.7	16	38	121.114	7.1	5	7	1014	113.012	8.88037
Q13263	Transcription intermediary factor 1-beta OS=Homo sapiens GN=TRIM28 PE=1 SV=5 - [TIF1B_HUMAN]	24.19	1	15	15	32	476.721	13.29	10	16	262.171	17.6	9	16	835	88.4934	5.77002
P12956	X-ray repair cross-complementing protein 6 OS=Homo sapiens GN=XRCC6 PE=1 SV=2 - [XRCC6_HUMAN]	22.99	1	10	10	25	418.532	20.03	9	18	143.74	11.33	5	7	609	69.7991	6.63916
P22736	Nuclear receptor subfamily 4 group A member 1 OS=Homo sapiens GN=NR4A1 PE=1 SV=1 - [NR4A1_HUMAN]	14.38	3	7	9	30	379.463	13.04	7	17	260.307	13.04	8	13	598	64.4222	7.1665
P23528	Cofilin-1 OS=Homo sapiens GN=CFL1 PE=1 SV=3 - [COF1_HUMAN]	42.17	2	4	4	10	372.699	42.17	4	8	49.17	18.67	2	2	166	18.4907	8.08936
P07737	Profilin-1 OS=Homo sapiens GN=PFN1 PE=1 SV=2 - [PROF1_HUMAN]	36.43	1	5	5	13	360.156	36.43	5	11	63.68	18.57	2	2	140	15.0446	8.26514
Q16576	Histone-binding protein RBBP7 OS=Homo sapiens GN=RBBP7 PE=1 SV=1 - [RBBP7_HUMAN]	23.06	1	3	7	20	358.581	20.71	6	13	157.283	13.65	4	7	425	47.7902	5.04639
P13639	Elongation factor 2 OS=Homo sapiens GN=EEF2 PE=1 SV=4 - [EF2_HUMAN]	10.96	1	7	7	20	358.235	9.56	6	14	81.4685	6.53	4	6	858	95.277	6.82959
Q99873	Protein arginine N-methyltransferase 1 OS=Homo sapiens GN=PRMT1 PE=1 SV=2 - [ANM1_HUMAN]	26.59	1	8	8	21	335.018	22.99	7	19	47.81	3.6	1	2	361	41.4885	5.42725
Q7L014	Probable ATP-dependent RNA helicase DDX46 OS=Homo sapiens GN=DDX46 PE=1 SV=2 - [DDX46_HUMAN]	9.99	1	8	8	19	320.947	7.47	6	13	130.537	5.24	4	6	1031	117.29	9.29053
P33993	DNA replication licensing factor MCM7 OS=Homo sapiens GN=MCM7 PE=1 SV=4 - [MCM7_HUMAN]	22.53	1	11	11	23	320.772	17.66	9	16	123.277	12.93	6	7	719	81.2566	6.45557
P13010	X-ray repair cross-complementing protein 5 OS=Homo sapiens GN=XRCC5 PE=1 SV=3 - [XRCC5_HUMAN]	13.93	1	10	10	21	310.332	13.93	9	14	137.104	9.56	5	7	732	82.6523	5.80811
O75643	U5 small nuclear ribonucleoprotein 200 kDa helicase OS=Homo sapiens GN=SNRNP200 PE=1 SV=2 - [U520_HUMAN]	6.98	1	11	11	19	302.134	6.37	10	16	41.2103	1.73	3	3	2136	244.353	6.06201
Q14103	Heterogeneous nuclear ribonucleoprotein D0 OS=Homo sapiens GN=HNRNPD PE=1 SV=1 - [HNRPD_HUMAN]	18.03	1	6	7	15	289.301	12.11	5	10	116.747	12.11	4	5	355	38.4103	7.81104
P09429	High mobility group protein B1 OS=Homo sapiens GN=HMGB1 PE=1 SV=3 - [HMGB1_HUMAN]	22.33	2	5	5	23	287.56	21.86	4	14	111.914	22.33	5	9	215	24.8782	5.74463
P08107	Heat shock 70 kDa protein 1A/1B OS=Homo sapiens GN=HSPA1A PE=1 SV=5 - [HSP71_HUMAN]	7.8	4	3	4	10	283.893	5.93	3	9	48.2	1.87	1	1	641	70.009	5.65576
P46063	ATP-dependent DNA helicase Q1 OS=Homo sapiens GN=RECQL PE=1 SV=3 - [RECQ1_HUMAN]	14.18	1	7	7	18	267.828	12.02	6	13	79.0357	6.16	3	5	649	73.41	7.88428
Q09028	Histone-binding protein RBBP4 OS=Homo sapiens GN=RBBP4 PE=1 SV=3 - [RBBP4_HUMAN]	15.06	1	1	5	11	267.544	15.06	5	8	83.5233	11.29	3	3	425	47.6261	4.89404
P83916	Chromobox protein homolog 1 OS=Homo sapiens GN=CBX1 PE=1 SV=1 - [CBX1_HUMAN]	18.38	1	2	3	6	261.77	8.65	1	3	83.0571	18.38	3	3	185	21.4046	4.93213
Q15233	Non-POU domain-containing octamer-binding protein OS=Homo sapiens GN=NONO PE=1 SV=4 - [NONO_HUMAN]	10.19	1	4	6	12	214.58	10.19	6	10	27.7257	4.88	2	2	471	54.1973	8.95361
P25205	DNA replication licensing factor MCM3 OS=Homo sapiens GN=MCM3 PE=1 SV=3 - [MCM3_HUMAN]	12.75	1	7	7	10	203.51	9.28	5	7	64.0167	3.47	2	3	808	90.924	5.77002
Q9BZK7	F-box-like/WD repeat-containing protein TBL1XR1 OS=Homo sapiens GN=TBL1XR1 PE=1 SV=1 - [TBL1R_HUMAN]	10.89	3	4	4	13	196.163	7.39	3	8	127.58	10.89	3	5	514	55.5601	5.5542
Q7L775	EPM2A-interacting protein 1 OS=Homo sapiens GN=EPM2AIP1 PE=1 SV=1 - [EPMIP_HUMAN]	4.45	1	2	2	4	189.487	4.45	2	4					607	70.3251	6.11279
P07195	L-lactate dehydrogenase B chain OS=Homo sapiens GN=LDHB PE=1 SV=2 - [LDHB_HUMAN]	12.87	1	3	3	5	180.094	7.78	2	4	27.44	5.09	1	1	334	36.6151	6.04932
O14979	Heterogeneous nuclear ribonucleoprotein D-like OS=Homo sapiens GN=HNRPDL PE=1 SV=3 - [HNRDL_HUMAN]	15	1	3	4	12	176.442	6.67	3	6	86.8034	15	4	6	420	46.4091	9.56885
P43354	Nuclear receptor subfamily 4 group A member 2 OS=Homo sapiens GN=NR4A2 PE=1 SV=1 - [NR4A2_HUMAN]	15.22	3	4	6	14	171.97	9.87	5	8	62.8021	10.37	4	6	598	66.5479	7.92822
P30041	Peroxiredoxin-6 OS=Homo sapiens GN=PRDX6 PE=1 SV=3 - [PRDX6_HUMAN]	28.57	1	5	5	12	170.003	28.57	5	10	44.9224	11.61	2	2	224	25.0192	6.37939
Q16629	Serine/arginine-rich splicing factor 7 OS=Homo sapiens GN=SRSF7 PE=1 SV=1 - [SRSF7_HUMAN]	8.82	1	1	2	8	169.17	8.82	2	5	50.9367	8.82	2	3	238	27.35	11.8247
Q07020	60S ribosomal protein L18 OS=Homo sapiens GN=RPL18 PE=1 SV=2 - [RL18_HUMAN]	6.91	1	1	1	5	169.124	6.91	1	3	52.55	6.91	1	2	188	21.6211	11.7222
P78527	DNA-dependent protein kinase catalytic subunit OS=Homo sapiens GN=PRKDC PE=1 SV=3 - [PRKDC_HUMAN]	3.08	1	8	8	10	165.722	1.43	5	7	89.18	1.65	3	3	4128	468.788	7.12256
Q04446	1,4-alpha-glucan-branching enzyme OS=Homo sapiens GN=GBE1 PE=1 SV=3 - [GLGB_HUMAN]	6.84	1	4	4	12	159.869	4.13	3	10	38.16	4.42	2	2	702	80.4226	6.31592
Q92499	ATP-dependent RNA helicase DDX1 OS=Homo sapiens GN=DDX1 PE=1 SV=2 - [DDX1_HUMAN]	3.92	1	2	2	6	159.669	3.92	2	5	20.6	1.49	1	1	740	82.3798	7.2251
Q15287	RNA-binding protein with serine-rich domain 1 OS=Homo sapiens GN=RNPS1 PE=1 SV=1 - [RNPS1_HUMAN]	12.79	1	2	2	8	158.913	12.79	2	5	52.8813	12.79	2	3	305	34.1877	11.8394
O60343	TBC1 domain family member 4 OS=Homo sapiens GN=TBC1D4 PE=1 SV=2 - [TBCD4_HUMAN]	5.7	1	5	5	11	152.099	3.78	3	6	87.68	3.16	3	5	1298	146.471	7.00537
P60660	Myosin light polypeptide 6 OS=Homo sapiens GN=MYL6 PE=1 SV=2 - [MYL6_HUMAN]	26.49	1	3	3	9	149.954	26.49	3	8	30.6	10.6	1	1	151	16.9191	4.65283
Q96JM3	Chromosome alignment-maintaining phosphoprotein 1 OS=Homo sapiens GN=CHAMP1 PE=1 SV=2 - [CHAP1_HUMAN]	5.3	1	3	3	7	147.46	5.3	3	6	34.09	1.97	1	1	812	89.0429	8.44092
P36873	Serine/threonine-protein phosphatase PP1-gamma catalytic subunit OS=Homo sapiens GN=PPP1CC PE=1 SV=1 - [PP1G_HUMAN]	7.74	3	2	2	7	146.622	4.33	1	3	52.52	7.74	2	4	323	36.9597	6.53662
P27694	Replication protein A 70 kDa DNA-binding subunit OS=Homo sapiens GN=RPA1 PE=1 SV=2 - [RFA1_HUMAN]	9.9	1	4	4	8	144.48	7.63	3	5	77.3967	5.03	2	3	616	68.0953	7.21045
P29401	Transketolase OS=Homo sapiens GN=TKT PE=1 SV=3 - [TKT_HUMAN]	13.64	1	4	4	8	142.78	7.06	2	4	94.81	10.75	3	4	623	67.8347	7.66455
O14980	Exportin-1 OS=Homo sapiens GN=XPO1 PE=1 SV=1 - [XPO1_HUMAN]	4.39	1	3	3	7	142.18	4.39	3	5	45.08	2.61	2	2	1071	123.306	6.06201
P30044	Peroxiredoxin-5, mitochondrial OS=Homo sapiens GN=PRDX5 PE=1 SV=4 - [PRDX5_HUMAN]	23.36	1	4	4	10	141.554	15.42	3	6	76.5359	18.22	3	4	214	22.0725	8.70459
Q96I24	Far upstream element-binding protein 3 OS=Homo sapiens GN=FUBP3 PE=1 SV=2 - [FUBP3_HUMAN]	15.91	1	4	6	12	138.488	9.97	4	7	80.4613	12.24	4	5	572	61.6022	8.38232
Q92570	Nuclear receptor subfamily 4 group A member 3 OS=Homo sapiens GN=NR4A3 PE=2 SV=3 - [NR4A3_HUMAN]	5.27	3	3	4	10	138.471	5.27	4	7	57.8887	3.67	3	3	626	68.1862	7.81104
Q06830	Peroxiredoxin-1 OS=Homo sapiens GN=PRDX1 PE=1 SV=1 - [PRDX1_HUMAN]	18.09	1	3	4	7	133.885	18.09	4	6	22.01	4.02	1	1	199	22.0963	8.1333
P32119	Peroxiredoxin-2 OS=Homo sapiens GN=PRDX2 PE=1 SV=5 - [PRDX2_HUMAN]	18.18	1	5	5	10	131.906	18.18	4	8	80.68	9.09	2	2	198	21.8782	5.97314
P06493	Cyclin-dependent kinase 1 OS=Homo sapiens GN=CDK1 PE=1 SV=3 - [CDK1_HUMAN]	17.17	26	3	4	7	130.03	11.78	3	6	29.51	5.39	1	1	297	34.0739	8.39697
P06748	Nucleophosmin OS=Homo sapiens GN=NPM1 PE=1 SV=2 - [NPM_HUMAN]	16.67	1	4	4	10	128.777	13.61	3	7	71.6326	9.52	1	3	294	32.5548	4.77979
Q9UMS4	Pre-mRNA-processing factor 19 OS=Homo sapiens GN=PRPF19 PE=1 SV=1 - [PRP19_HUMAN]	28.37	1	5	6	12	128.72	15.08	4	9	61.47	16.67	3	3	504	55.1463	6.60986
Q9Y490	Talin-1 OS=Homo sapiens GN=TLN1 PE=1 SV=3 - [TLN1_HUMAN]	1.89	1	3	3	7	128.46	1.89	3	5	42.17	0.83	1	2	2541	269.599	6.07471
P53999	Activated RNA polymerase II transcriptional coactivator p15 OS=Homo sapiens GN=SUB1 PE=1 SV=3 - [TCP4_HUMAN]	30.71	1	4	4	8	128.258	11.02	2	6	32.82	19.69	2	2	127	14.3864	9.59814
Q9P0K7	Ankycorbin OS=Homo sapiens GN=RAI14 PE=1 SV=2 - [RAI14_HUMAN]	11.73	1	5	6	8	123.299	8.27	5	6	28.63	5.51	2	2	980	109.973	6.21436
Q66PJ3	ADP-ribosylation factor-like protein 6-interacting protein 4 OS=Homo sapiens GN=ARL6IP4 PE=1 SV=2 - [AR6P4_HUMAN]	8.55	1	3	3	7	122.906	8.55	2	5	29.66	4.51	1	2	421	44.8882	10.9312
P62249	40S ribosomal protein S16 OS=Homo sapiens GN=RPS16 PE=1 SV=2 - [RS16_HUMAN]	19.86	1	3	3	5	122.385	19.86	3	5					146	16.435	10.2134
P62701	40S ribosomal protein S4, X isoform OS=Homo sapiens GN=RPS4X PE=1 SV=2 - [RS4X_HUMAN]	3.42	1	1	1	3	121.665	3.42	1	3					263	29.5791	10.1548
P19338	Nucleolin OS=Homo sapiens GN=NCL PE=1 SV=3 - [NUCL_HUMAN]	9.44	1	4	4	5	120.791	9.44	4	4	37.49	3.1	1	1	710	76.5684	4.70361
P23396	40S ribosomal protein S3 OS=Homo sapiens GN=RPS3 PE=1 SV=2 - [RS3_HUMAN]	12.76	1	3	3	7	118.749	12.76	3	7					243	26.6714	9.65674
P30050	60S ribosomal protein L12 OS=Homo sapiens GN=RPL12 PE=1 SV=1 - [RL12_HUMAN]	14.55	1	2	2	4	117.578	14.55	2	4					165	17.8075	9.42236
Q9NR45	Sialic acid synthase OS=Homo sapiens GN=NANS PE=1 SV=2 - [SIAS_HUMAN]	14.48	1	3	3	8	110.21	5.01	1	4	55.8066	14.48	3	4	359	40.2815	6.7417
O43395	U4/U6 small nuclear ribonucleoprotein Prp3 OS=Homo sapiens GN=PRPF3 PE=1 SV=2 - [PRPF3_HUMAN]	6.44	1	3	3	6	109.539	6.44	3	5	28.91	1.9	1	1	683	77.4809	9.49561
P63104	14-3-3 protein zeta/delta OS=Homo sapiens GN=YWHAZ PE=1 SV=1 - [1433Z_HUMAN]	15.1	1	2	2	4	105.888	7.76	1	2	48.75	7.35	1	2	245	27.7277	4.79248
P31689	DnaJ homolog subfamily A member 1 OS=Homo sapiens GN=DNAJA1 PE=1 SV=2 - [DNJA1_HUMAN]	19.14	3	7	7	14	105.48	19.14	5	8	64.8765	12.09	4	6	397	44.8395	7.07861
P33992	DNA replication licensing factor MCM5 OS=Homo sapiens GN=MCM5 PE=1 SV=5 - [MCM5_HUMAN]	10.9	1	5	5	12	104.323	8.31	4	9	43.6322	6.68	3	3	734	82.2332	8.36768
P61204	ADP-ribosylation factor 3 OS=Homo sapiens GN=ARF3 PE=1 SV=2 - [ARF3_HUMAN]	27.07	3	2	4	4	103.886	16.02	3	3	34.38	11.05	1	1	181	20.5877	7.43018
P39748	Flap endonuclease 1 OS=Homo sapiens GN=FEN1 PE=1 SV=1 - [FEN1_HUMAN]	11.05	1	3	3	6	103.33	8.16	2	4	54.3298	8.16	2	2	380	42.5661	8.6167
Q8WVV9	Heterogeneous nuclear ribonucleoprotein L-like OS=Homo sapiens GN=HNRPLL PE=1 SV=1 - [HNRLL_HUMAN]	5.72	1	2	2	4	102.995	5.72	2	3	26.78	2.95	1	1	542	60.0449	7.72314
Q5VTR2	E3 ubiquitin-protein ligase BRE1A OS=Homo sapiens GN=RNF20 PE=1 SV=2 - [BRE1A_HUMAN]	1.74	1	1	1	4	102.387	1.74	1	4					975	113.592	5.93506
P63173	60S ribosomal protein L38 OS=Homo sapiens GN=RPL38 PE=1 SV=2 - [RL38_HUMAN]	18.57	1	2	2	5	100.12	18.57	2	4	31.53	18.57	1	1	70	8.21273	10.0962
P62081	40S ribosomal protein S7 OS=Homo sapiens GN=RPS7 PE=1 SV=1 - [RS7_HUMAN]	17.01	1	2	2	3	98.3239	17.01	2	2	27.08	11.34	1	1	194	22.1133	10.0962
Q9Y5B9	FACT complex subunit SPT16 OS=Homo sapiens GN=SUPT16H PE=1 SV=1 - [SP16H_HUMAN]	5.25	1	3	3	6	98.1455	3.34	2	3	46.2535	3.72	2	3	1047	119.838	5.65576
P61956	Small ubiquitin-related modifier 2 OS=Homo sapiens GN=SUMO2 PE=1 SV=3 - [SUMO2_HUMAN]	12.63	3	1	1	2	98.0903	12.63	1	2					95	10.8644	5.50342
P48643	T-complex protein 1 subunit epsilon OS=Homo sapiens GN=CCT5 PE=1 SV=1 - [TCPE_HUMAN]	6.28	1	3	3	4	96.8926	6.28	3	3	22.06	2.03	1	1	541	59.6328	5.65576
Q13162	Peroxiredoxin-4 OS=Homo sapiens GN=PRDX4 PE=1 SV=1 - [PRDX4_HUMAN]	15.13	1	2	3	8	96.1417	15.13	3	5	48.2467	8.12	2	3	271	30.5208	6.29053
P45973	Chromobox protein homolog 5 OS=Homo sapiens GN=CBX5 PE=1 SV=1 - [CBX5_HUMAN]	10.99	1	2	2	3	96.04	10.99	2	3					191	22.2111	5.85889
Q9Y3I0	tRNA-splicing ligase RtcB homolog OS=Homo sapiens GN=C22orf28 PE=1 SV=1 - [RTCB_HUMAN]	5.94	1	2	2	5	95.6749	5.94	2	5					505	55.1749	7.2251
P0CG48	Polyubiquitin-C OS=Homo sapiens GN=UBC PE=1 SV=3 - [UBC_HUMAN]	32.85	4	2	2	4	93.4808	32.85	2	3	26.77	11.82	1	1	685	76.9915	7.66455
P38606	V-type proton ATPase catalytic subunit A OS=Homo sapiens GN=ATP6V1A PE=1 SV=2 - [VATA_HUMAN]	4.38	1	2	2	4	93.2953	4.38	2	4					617	68.2605	5.51611
P15880	40S ribosomal protein S2 OS=Homo sapiens GN=RPS2 PE=1 SV=2 - [RS2_HUMAN]	8.53	1	2	2	3	92.6667	8.53	2	3					293	31.3046	10.2427
P16949	Stathmin OS=Homo sapiens GN=STMN1 PE=1 SV=3 - [STMN1_HUMAN]	18.12	1	2	2	3	89.6366	8.72	1	2	31.17	9.4	1	1	149	17.292	5.97314
Q9UQE7	Structural maintenance of chromosomes protein 3 OS=Homo sapiens GN=SMC3 PE=1 SV=2 - [SMC3_HUMAN]	5.09	1	5	5	8	83.9284	4.11	4	7	50.63	0.99	1	1	1217	141.454	7.18115
Q14683	Structural maintenance of chromosomes protein 1A OS=Homo sapiens GN=SMC1A PE=1 SV=2 - [SMC1A_HUMAN]	3.97	1	4	4	6	83.7613	2.03	2	3	26.9093	1.95	2	3	1233	143.144	7.63525
O95983	Methyl-CpG-binding domain protein 3 OS=Homo sapiens GN=MBD3 PE=1 SV=1 - [MBD3_HUMAN]	5.15	1	1	1	1	83.32	5.15	1	1					291	32.8233	5.33838
Q01780	Exosome component 10 OS=Homo sapiens GN=EXOSC10 PE=1 SV=2 - [EXOSX_HUMAN]	5.54	1	3	3	5	81.9637	2.82	2	3	37.16	2.71	1	2	885	100.768	8.45557
Q8WXF1	Paraspeckle component 1 OS=Homo sapiens GN=PSPC1 PE=1 SV=1 - [PSPC1_HUMAN]	4.4	1	1	2	4	77.2215	4.4	2	4					523	58.7062	6.66846
P62760	Visinin-like protein 1 OS=Homo sapiens GN=VSNL1 PE=1 SV=2 - [VISL1_HUMAN]	6.28	1	1	1	2	76.57	6.28	1	1	67.6	6.28	1	1	191	22.128	5.14795
P62913	60S ribosomal protein L11 OS=Homo sapiens GN=RPL11 PE=1 SV=2 - [RL11_HUMAN]	7.87	1	1	1	2	75.57	7.87	1	1	33.72	7.87	1	1	178	20.2396	9.59814
Q13242	Serine/arginine-rich splicing factor 9 OS=Homo sapiens GN=SRSF9 PE=1 SV=1 - [SRSF9_HUMAN]	14.03	1	3	3	3	75.1138	14.03	3	3					221	25.5264	8.646
P16152	Carbonyl reductase [NADPH] 1 OS=Homo sapiens GN=CBR1 PE=1 SV=3 - [CBR1_HUMAN]	15.52	2	2	2	5	74.903	4.69	1	3	37.7249	15.52	2	2	277	30.3559	8.32373
Q9Y2V2	Calcium-regulated heat stable protein 1 OS=Homo sapiens GN=CARHSP1 PE=1 SV=2 - [CHSP1_HUMAN]	10.88	1	1	1	4	74.4018	10.88	1	3	24.07	10.88	1	1	147	15.882	8.20654
P52701	DNA mismatch repair protein Msh6 OS=Homo sapiens GN=MSH6 PE=1 SV=2 - [MSH6_HUMAN]	0.88	1	1	1	1	74.17	0.88	1	1					1360	152.689	6.90283
Q02539	Histone H1.1 OS=Homo sapiens GN=HIST1H1A PE=1 SV=3 - [H11_HUMAN]	14.42	2	1	2	4	73.6641	5.12	1	3	20.05	9.3	1	1	215	21.8289	10.9897
Q13285	Steroidogenic factor 1 OS=Homo sapiens GN=NR5A1 PE=1 SV=2 - [STF1_HUMAN]	2.39	1	1	1	1	72.87	2.39	1	1					461	51.6023	7.6792
P63244	Guanine nucleotide-binding protein subunit beta-2-like 1 OS=Homo sapiens GN=GNB2L1 PE=1 SV=3 - [GBLP_HUMAN]	8.83	1	2	2	4	72.6867	5.05	1	3	22.82	3.79	1	1	317	35.0546	7.69385
P11940	Polyadenylate-binding protein 1 OS=Homo sapiens GN=PABPC1 PE=1 SV=2 - [PABP1_HUMAN]	8.33	2	4	4	8	71.2488	3.93	2	4	61.8447	6.76	3	4	636	70.6259	9.49561
Q99471	Prefoldin subunit 5 OS=Homo sapiens GN=PFDN5 PE=1 SV=2 - [PFD5_HUMAN]	11.69	1	1	1	2	70.12	11.69	1	1	23.09	11.69	1	1	154	17.317	6.32861
Q01105	Protein SET OS=Homo sapiens GN=SET PE=1 SV=3 - [SET_HUMAN]	8.28	2	2	2	6	70.0904	3.45	1	3	49.26	4.83	1	3	290	33.4687	4.32275
Q04725	Transducin-like enhancer protein 2 OS=Homo sapiens GN=TLE2 PE=1 SV=2 - [TLE2_HUMAN]	3.63	4	2	2	5	70.0443	3.63	2	3	35.6218	2.15	1	2	743	79.7908	6.62451
Q14839	Chromodomain-helicase-DNA-binding protein 4 OS=Homo sapiens GN=CHD4 PE=1 SV=2 - [CHD4_HUMAN]	3.71	1	3	3	7	69.3788	2.46	2	3	97.9793	3.71	3	4	1912	217.867	5.85889
P45974	Ubiquitin carboxyl-terminal hydrolase 5 OS=Homo sapiens GN=USP5 PE=1 SV=2 - [UBP5_HUMAN]	9.79	1	5	5	8	69.281	3.73	3	6	34.95	6.06	2	2	858	95.7253	5.03369
P46013	Antigen KI-67 OS=Homo sapiens GN=MKI67 PE=1 SV=2 - [KI67_HUMAN]	1.47	1	2	2	2	69.2494	1.47	2	2					3256	358.474	9.45166
P26368	Splicing factor U2AF 65 kDa subunit OS=Homo sapiens GN=U2AF2 PE=1 SV=4 - [U2AF2_HUMAN]	9.05	1	2	2	7	68.1443	6.95	1	3	71.2006	9.05	2	4	475	53.4672	9.08545
P62273	40S ribosomal protein S29 OS=Homo sapiens GN=RPS29 PE=1 SV=2 - [RS29_HUMAN]	14.29	1	1	1	3	67.1908	14.29	1	3					56	6.6723	10.1255
P62826	GTP-binding nuclear protein Ran OS=Homo sapiens GN=RAN PE=1 SV=3 - [RAN_HUMAN]	9.72	1	2	2	3	67.14	4.63	1	2	37.26	5.09	1	1	216	24.4076	7.48877
O43684	Mitotic checkpoint protein BUB3 OS=Homo sapiens GN=BUB3 PE=1 SV=1 - [BUB3_HUMAN]	8.23	1	2	2	8	66.6732	8.23	2	4	49.9915	6.1	1	4	328	37.1312	6.84424
O75131	Copine-3 OS=Homo sapiens GN=CPNE3 PE=1 SV=1 - [CPNE3_HUMAN]	3.35	8	2	2	4	66.5983	3.35	2	4					537	60.0921	5.84619
O43172	U4/U6 small nuclear ribonucleoprotein Prp4 OS=Homo sapiens GN=PRPF4 PE=1 SV=2 - [PRP4_HUMAN]	12.07	1	4	4	6	66.37	9.96	3	5	26.61	2.11	1	1	522	58.4124	7.41553
P23193	Transcription elongation factor A protein 1 OS=Homo sapiens GN=TCEA1 PE=1 SV=2 - [TCEA1_HUMAN]	4.98	1	1	1	3	65.9514	4.98	1	3					301	33.948	8.38232
Q96DI7	U5 small nuclear ribonucleoprotein 40 kDa protein OS=Homo sapiens GN=SNRNP40 PE=1 SV=1 - [SNR40_HUMAN]	7.84	1	1	1	2	65.3491	7.84	1	2					357	39.2857	8.104
Q92769	Histone deacetylase 2 OS=Homo sapiens GN=HDAC2 PE=1 SV=2 - [HDAC2_HUMAN]	6.35	2	2	2	4	64.4673	2.46	1	3	21.29	3.89	1	1	488	55.3288	5.90967
P43246	DNA mismatch repair protein Msh2 OS=Homo sapiens GN=MSH2 PE=1 SV=1 - [MSH2_HUMAN]	6.32	1	4	4	6	64.2265	3	2	2	73.7418	4.82	3	4	934	104.677	5.77002
P54920	Alpha-soluble NSF attachment protein OS=Homo sapiens GN=NAPA PE=1 SV=3 - [SNAA_HUMAN]	8.47	1	2	2	2	62.67	4.41	1	1	26.99	4.07	1	1	295	33.2113	5.36377
P51532	Transcription activator BRG1 OS=Homo sapiens GN=SMARCA4 PE=1 SV=2 - [SMCA4_HUMAN]	3.1	2	4	4	5	62.5867	1.7	2	3	37.45	1.4	2	2	1647	184.53	7.88428
Q16531	DNA damage-binding protein 1 OS=Homo sapiens GN=DDB1 PE=1 SV=1 - [DDB1_HUMAN]	4.74	1	2	2	3	62.36	2.11	1	1	36.4126	4.74	2	2	1140	126.887	5.26221
P26373	60S ribosomal protein L13 OS=Homo sapiens GN=RPL13 PE=1 SV=4 - [RL13_HUMAN]	3.79	1	1	1	2	62.2678	3.79	1	2					211	24.2465	11.6489
Q9HAV4	Exportin-5 OS=Homo sapiens GN=XPO5 PE=1 SV=1 - [XPO5_HUMAN]	1	1	1	1	3	62.1165	1	1	2	24.35	1	1	1	1204	136.222	5.79541
P42166	Lamina-associated polypeptide 2, isoform alpha OS=Homo sapiens GN=TMPO PE=1 SV=2 - [LAP2A_HUMAN]	8.93	2	3	3	5	61.8046	5.19	2	3	51.05	3.75	1	2	694	75.4456	7.66455
P28482	Mitogen-activated protein kinase 1 OS=Homo sapiens GN=MAPK1 PE=1 SV=3 - [MK01_HUMAN]	8.33	1	2	2	7	61.26	3.06	1	5	40.4024	8.33	2	2	360	41.3632	6.97607
P62995	Transformer-2 protein homolog beta OS=Homo sapiens GN=TRA2B PE=1 SV=1 - [TRA2B_HUMAN]	10.42	1	2	2	6	60.87	4.86	1	1	130.91	10.42	2	5	288	33.6456	11.2534
Q8TAT6	Nuclear protein localization protein 4 homolog OS=Homo sapiens GN=NPLOC4 PE=1 SV=3 - [NPL4_HUMAN]	2.47	1	1	1	2	60.62	2.47	1	2					608	68.0769	6.37939
Q13526	Peptidyl-prolyl cis-trans isomerase NIMA-interacting 1 OS=Homo sapiens GN=PIN1 PE=1 SV=1 - [PIN1_HUMAN]	9.2	1	1	1	2	60.56	9.2	1	2					163	18.232	8.82178
Q14320	Protein FAM50A OS=Homo sapiens GN=FAM50A PE=1 SV=2 - [FA50A_HUMAN]	7.96	2	2	2	5	59.9489	7.96	2	4	28.68	4.13	1	1	339	40.2165	6.82959
Q9Y2L1	Exosome complex exonuclease RRP44 OS=Homo sapiens GN=DIS3 PE=1 SV=2 - [RRP44_HUMAN]	5.64	1	4	4	6	59.398	3.97	3	4	39.15	3.13	2	2	958	108.934	7.13721
P46781	40S ribosomal protein S9 OS=Homo sapiens GN=RPS9 PE=1 SV=3 - [RS9_HUMAN]	12.89	1	3	3	3	59.3224	12.89	3	3					194	22.5776	10.6528
Q15717	ELAV-like protein 1 OS=Homo sapiens GN=ELAVL1 PE=1 SV=2 - [ELAV1_HUMAN]	3.99	1	1	1	3	59.13	3.99	1	1	31.61	3.99	1	2	326	36.0692	9.17334
P33991	DNA replication licensing factor MCM4 OS=Homo sapiens GN=MCM4 PE=1 SV=5 - [MCM4_HUMAN]	3.71	1	2	2	4	57.7334	3.71	2	4					863	96.4976	6.7417
P31948	Stress-induced-phosphoprotein 1 OS=Homo sapiens GN=STIP1 PE=1 SV=1 - [STIP1_HUMAN]	1.84	1	1	1	3	57.56	1.84	1	1	71.72	1.84	1	2	543	62.5994	6.80029
O43447	Peptidyl-prolyl cis-trans isomerase H OS=Homo sapiens GN=PPIH PE=1 SV=1 - [PPIH_HUMAN]	8.47	2	1	2	5	57.3236	8.47	2	5					177	19.1956	8.07471
Q92878	DNA repair protein RAD50 OS=Homo sapiens GN=RAD50 PE=1 SV=1 - [RAD50_HUMAN]	2.59	1	2	2	2	56.9879	2.59	2	2					1312	153.797	6.88818
Q14980	Nuclear mitotic apparatus protein 1 OS=Homo sapiens GN=NUMA1 PE=1 SV=2 - [NUMA1_HUMAN]	2.32	1	3	3	4	56.71	1.47	2	2	30.01	1.65	2	2	2115	238.115	5.78271
O15397	Importin-8 OS=Homo sapiens GN=IPO8 PE=1 SV=2 - [IPO8_HUMAN]	1.25	1	1	1	2	56.4147	1.25	1	2					1037	119.861	5.16064
Q9UBF1	Melanoma-associated antigen C2 OS=Homo sapiens GN=MAGEC2 PE=1 SV=1 - [MAGC2_HUMAN]	2.95	1	1	1	2	56.02	2.95	1	1	43.52	2.95	1	1	373	41.1369	4.31006
P17480	Nucleolar transcription factor 1 OS=Homo sapiens GN=UBTF PE=1 SV=1 - [UBF1_HUMAN]	4.71	1	3	3	3	56.0166	4.71	3	3					764	89.3502	5.80811
P32969	60S ribosomal protein L9 OS=Homo sapiens GN=RPL9 PE=1 SV=1 - [RL9_HUMAN]	5.73	1	2	2	3	55.9607	5.73	2	2	28.26	5.73	1	1	192	21.8498	9.94971
P62263	40S ribosomal protein S14 OS=Homo sapiens GN=RPS14 PE=1 SV=3 - [RS14_HUMAN]	15.23	1	2	2	3	55.6924	15.23	2	2	32.81	13.91	1	1	151	16.2625	10.0522
Q02790	Peptidyl-prolyl cis-trans isomerase FKBP4 OS=Homo sapiens GN=FKBP4 PE=1 SV=3 - [FKBP4_HUMAN]	14.81	1	4	4	7	55.6774	10.46	3	5	34.14	7.41	2	2	459	51.7721	5.42725
Q99496	E3 ubiquitin-protein ligase RING2 OS=Homo sapiens GN=RNF2 PE=1 SV=1 - [RING2_HUMAN]	4.17	2	1	1	3	55.29	4.17	1	2	26.82	4.17	1	1	336	37.6316	6.84424
P68036	Ubiquitin-conjugating enzyme E2 L3 OS=Homo sapiens GN=UBE2L3 PE=1 SV=1 - [UB2L3_HUMAN]	14.29	1	1	1	2	55.16	14.29	1	1	73.74	14.29	1	1	154	17.8502	8.51416
Q9UKM9	RNA-binding protein Raly OS=Homo sapiens GN=RALY PE=1 SV=1 - [RALY_HUMAN]	6.86	1	1	1	2	55.0532	6.86	1	2					306	32.4436	9.17334
P00568	Adenylate kinase isoenzyme 1 OS=Homo sapiens GN=AK1 PE=1 SV=3 - [KAD1_HUMAN]	6.7	1	1	1	2	54.5798	6.7	1	2					194	21.6213	8.63135
Q9UHX1	Poly(U)-binding-splicing factor PUF60 OS=Homo sapiens GN=PUF60 PE=1 SV=1 - [PUF60_HUMAN]	10.2	1	3	3	5	54.35	10.2	3	5					559	59.8376	5.2876
P11802	Cyclin-dependent kinase 4 OS=Homo sapiens GN=CDK4 PE=1 SV=2 - [CDK4_HUMAN]	7.92	26	1	2	3	53.4888	7.92	2	3					303	33.7084	7.00537
Q15365	Poly(rC)-binding protein 1 OS=Homo sapiens GN=PCBP1 PE=1 SV=2 - [PCBP1_HUMAN]	16.29	2	2	3	4	53.2519	10.67	2	2	40.87	5.62	1	2	356	37.4739	7.09326
P13489	Ribonuclease inhibitor OS=Homo sapiens GN=RNH1 PE=1 SV=2 - [RINI_HUMAN]	2.39	1	1	1	1	52.77	2.39	1	1					461	49.9411	4.81787
P40227	T-complex protein 1 subunit zeta OS=Homo sapiens GN=CCT6A PE=1 SV=3 - [TCPZ_HUMAN]	6.4	2	2	2	2	52.31	6.4	2	2					531	57.9876	6.68311
P30086	Phosphatidylethanolamine-binding protein 1 OS=Homo sapiens GN=PEBP1 PE=1 SV=3 - [PEBP1_HUMAN]	18.72	1	2	2	4	51.7533	8.02	1	3	26.1	10.7	1	1	187	21.0437	7.53271
P50991	T-complex protein 1 subunit delta OS=Homo sapiens GN=CCT4 PE=1 SV=4 - [TCPD_HUMAN]	8.53	1	3	3	4	51.36	4.82	2	3	37.62	3.71	1	1	539	57.8878	7.82568
P11388	DNA topoisomerase 2-alpha OS=Homo sapiens GN=TOP2A PE=1 SV=3 - [TOP2A_HUMAN]	2.48	1	1	3	4	50.361	1.63	2	3	32.41	0.85	1	1	1531	174.276	8.71924
P62258	14-3-3 protein epsilon OS=Homo sapiens GN=YWHAE PE=1 SV=1 - [1433E_HUMAN]	18.04	1	3	3	5	50.06	12.94	2	2	43.39	11.76	2	3	255	29.1554	4.7417
Q86VP6	Cullin-associated NEDD8-dissociated protein 1 OS=Homo sapiens GN=CAND1 PE=1 SV=2 - [CAND1_HUMAN]	1.95	1	2	2	3	49.98	1.95	2	3					1230	136.289	5.78271
P42771	Cyclin-dependent kinase inhibitor 2A, isoforms 1/2/3 OS=Homo sapiens GN=CDKN2A PE=1 SV=2 - [CD2A1_HUMAN]	7.69	1	1	1	2	49.27	7.69	1	2					156	16.5224	5.80811
P55072	Transitional endoplasmic reticulum ATPase OS=Homo sapiens GN=VCP PE=1 SV=4 - [TERA_HUMAN]	2.11	1	1	1	1	49.24	2.11	1	1					806	89.2657	5.26221
Q92947	Glutaryl-CoA dehydrogenase, mitochondrial OS=Homo sapiens GN=GCDH PE=1 SV=1 - [GCDH_HUMAN]	5.48	1	1	1	2	49.06	5.48	1	1	64.3	5.48	1	1	438	48.0964	8.06006
P26583	High mobility group protein B2 OS=Homo sapiens GN=HMGB2 PE=1 SV=2 - [HMGB2_HUMAN]	6.7	1	1	1	4	49.0533	6.7	1	3	23.88	6.7	1	1	209	24.0187	7.81104
O15042	U2 snRNP-associated SURP motif-containing protein OS=Homo sapiens GN=U2SURP PE=1 SV=2 - [SR140_HUMAN]	2.62	1	2	3	4	48.9913	2.62	3	3	21.61	0.78	1	1	1029	118.219	8.47021
P01859	Ig gamma-2 chain C region OS=Homo sapiens GN=IGHG2 PE=1 SV=2 - [IGHG2_HUMAN]	2.15	4	1	1	6	48.5664	2.15	1	5	24.52	2.15	1	1	326	35.8778	7.59131
P46778	60S ribosomal protein L21 OS=Homo sapiens GN=RPL21 PE=1 SV=2 - [RL21_HUMAN]	9.38	1	1	1	2	48.4787	9.38	1	2					160	18.5531	10.4917
P51858	Hepatoma-derived growth factor OS=Homo sapiens GN=HDGF PE=1 SV=1 - [HDGF_HUMAN]	7.08	1	1	1	1	48.38	7.08	1	1					240	26.7719	4.729
P08621	U1 small nuclear ribonucleoprotein 70 kDa OS=Homo sapiens GN=SNRNP70 PE=1 SV=2 - [RU17_HUMAN]	6.18	1	2	2	5	48.3434	6.18	2	3	24.9	6.18	2	2	437	51.5258	9.93506
P23284	Peptidyl-prolyl cis-trans isomerase B OS=Homo sapiens GN=PPIB PE=1 SV=2 - [PPIB_HUMAN]	9.26	2	1	2	5	47.9771	9.26	2	5					216	23.7275	9.40771
Q07955	Serine/arginine-rich splicing factor 1 OS=Homo sapiens GN=SRSF1 PE=1 SV=2 - [SRSF1_HUMAN]	8.06	1	2	2	2	47.89	4.03	1	1	32.3	4.03	1	1	248	27.7278	10.3599
P46776	60S ribosomal protein L27a OS=Homo sapiens GN=RPL27A PE=1 SV=2 - [RL27A_HUMAN]	6.76	1	1	1	1	47.46	6.76	1	1					148	16.551	11.0044
O75531	Barrier-to-autointegration factor OS=Homo sapiens GN=BANF1 PE=1 SV=1 - [BAF_HUMAN]	29.21	1	2	2	3	47.46	29.21	1	1	44.94	29.21	2	2	89	10.052	6.0874
Q02880	DNA topoisomerase 2-beta OS=Homo sapiens GN=TOP2B PE=1 SV=3 - [TOP2B_HUMAN]	2.15	1	1	3	4	47.4243	1.35	2	3	32.41	0.8	1	1	1626	183.152	8.00146
P21333	Filamin-A OS=Homo sapiens GN=FLNA PE=1 SV=4 - [FLNA_HUMAN]	2.8	1	5	5	6	46.4933	1.59	3	3	38.242	1.78	3	3	2647	280.564	6.06201
P09012	U1 small nuclear ribonucleoprotein A OS=Homo sapiens GN=SNRPA PE=1 SV=3 - [SNRPA_HUMAN]	6.38	1	1	1	3	46.05	6.38	1	1	30.3	6.38	1	2	282	31.2592	9.83252
Q7Z3K3	Pogo transposable element with ZNF domain OS=Homo sapiens GN=POGZ PE=1 SV=2 - [POGZ_HUMAN]	2.06	1	2	2	4	45.744	2.06	2	4					1410	155.245	7.40088
P61353	60S ribosomal protein L27 OS=Homo sapiens GN=RPL27 PE=1 SV=2 - [RL27_HUMAN]	6.62	1	1	1	2	44.78	6.62	1	2					136	15.7877	10.5649
O75150	E3 ubiquitin-protein ligase BRE1B OS=Homo sapiens GN=RNF40 PE=1 SV=4 - [BRE1B_HUMAN]	1.7	1	1	1	2	44.3981	1.7	1	2					1001	113.581	6.22705
P62888	60S ribosomal protein L30 OS=Homo sapiens GN=RPL30 PE=1 SV=2 - [RL30_HUMAN]	10.43	1	1	1	1	43.84	10.43	1	1					115	12.7757	9.62744
Q2TAY7	WD40 repeat-containing protein SMU1 OS=Homo sapiens GN=SMU1 PE=1 SV=2 - [SMU1_HUMAN]	16.37	1	4	4	5	43.7277	7.99	2	2	53.7167	13.06	3	3	513	57.5072	7.18115
P61313	60S ribosomal protein L15 OS=Homo sapiens GN=RPL15 PE=1 SV=2 - [RL15_HUMAN]	5.88	1	1	1	1	42.93	5.88	1	1					204	24.1311	11.6196
P26641	Elongation factor 1-gamma OS=Homo sapiens GN=EEF1G PE=1 SV=3 - [EF1G_HUMAN]	5.49	1	2	2	2	42.2724	5.49	2	2					437	50.0871	6.66846
Q9UKN8	General transcription factor 3C polypeptide 4 OS=Homo sapiens GN=GTF3C4 PE=1 SV=2 - [TF3C4_HUMAN]	4.74	1	2	3	4	41.3398	2.8	2	3	34.04	1.95	1	1	822	91.9235	6.65381
P62318	Small nuclear ribonucleoprotein Sm D3 OS=Homo sapiens GN=SNRPD3 PE=1 SV=1 - [SMD3_HUMAN]	7.14	1	1	1	2	41.2743	7.14	1	2					126	13.9073	10.3159
Q96AE4	Far upstream element-binding protein 1 OS=Homo sapiens GN=FUBP1 PE=1 SV=3 - [FUBP1_HUMAN]	6.68	1	1	3	3	40.2773	5.28	2	2	24.39	1.4	1	1	644	67.5185	7.60596
P43487	Ran-specific GTPase-activating protein OS=Homo sapiens GN=RANBP1 PE=1 SV=1 - [RANG_HUMAN]	5.47	1	1	1	1	39.96	5.47	1	1					201	23.2956	5.2876
Q9NTK5	Obg-like ATPase 1 OS=Homo sapiens GN=OLA1 PE=1 SV=2 - [OLA1_HUMAN]	3.79	1	1	1	2	39.94	3.79	1	2					396	44.7153	7.81104
Q02543	60S ribosomal protein L18a OS=Homo sapiens GN=RPL18A PE=1 SV=2 - [RL18A_HUMAN]	4.55	1	1	1	5	39.2336	4.55	1	4	20.53	4.55	1	1	176	20.7489	10.7114
P17987	T-complex protein 1 subunit alpha OS=Homo sapiens GN=TCP1 PE=1 SV=1 - [TCPA_HUMAN]	5.04	1	2	2	2	39.02	1.98	1	1	29.42	3.06	1	1	556	60.3056	6.11279
Q12906	Interleukin enhancer-binding factor 3 OS=Homo sapiens GN=ILF3 PE=1 SV=3 - [ILF3_HUMAN]	2.35	2	2	2	3	38.26	1.12	1	1	40.87	1.23	1	2	894	95.2791	8.76318
P18085	ADP-ribosylation factor 4 OS=Homo sapiens GN=ARF4 PE=1 SV=3 - [ARF4_HUMAN]	22.78	1	1	3	3	38.17	6.11	1	1	47.4003	16.67	2	2	180	20.4977	7.13721
P46783	40S ribosomal protein S10 OS=Homo sapiens GN=RPS10 PE=1 SV=1 - [RS10_HUMAN]	14.55	2	2	2	2	37.96	9.09	1	1	21.6	5.45	1	1	165	18.8859	10.1548
O43663	Protein regulator of cytokinesis 1 OS=Homo sapiens GN=PRC1 PE=1 SV=2 - [PRC1_HUMAN]	5.48	2	3	3	4	37.9108	3.23	2	3	20.83	2.26	1	1	620	71.5616	6.68311
P62277	40S ribosomal protein S13 OS=Homo sapiens GN=RPS13 PE=1 SV=2 - [RS13_HUMAN]	8.61	1	1	1	1	37.78	8.61	1	1					151	17.2117	10.5356
A8MWD9	Small nuclear ribonucleoprotein G-like protein OS=Homo sapiens PE=2 SV=2 - [RUXGL_HUMAN]	15.79	2	1	1	1	37.58	15.79	1	1					76	8.53845	8.83643
Q08J23	tRNA (cytosine(34)-C(5))-methyltransferase OS=Homo sapiens GN=NSUN2 PE=1 SV=2 - [NSUN2_HUMAN]	5.22	1	3	3	5	37.1048	3.26	2	3	26.64	1.96	1	2	767	86.4158	6.771
P49959	Double-strand break repair protein MRE11A OS=Homo sapiens GN=MRE11A PE=1 SV=3 - [MRE11_HUMAN]	2.12	1	1	1	1	37.1	2.12	1	1					708	80.5433	5.89697
P24666	Low molecular weight phosphotyrosine protein phosphatase OS=Homo sapiens GN=ACP1 PE=1 SV=3 - [PPAC_HUMAN]	5.7	1	1	1	1	37.03	5.7	1	1					158	18.0308	6.7417
Q9BUJ2	Heterogeneous nuclear ribonucleoprotein U-like protein 1 OS=Homo sapiens GN=HNRNPUL1 PE=1 SV=2 - [HNRL1_HUMAN]	1.75	1	1	1	1	36.64	1.75	1	1					856	95.6793	6.91748
P63279	SUMO-conjugating enzyme UBC9 OS=Homo sapiens GN=UBE2I PE=1 SV=1 - [UBC9_HUMAN]	8.23	1	1	1	1	36.56	8.23	1	1					158	17.9952	8.66064
Q92922	SWI/SNF complex subunit SMARCC1 OS=Homo sapiens GN=SMARCC1 PE=1 SV=3 - [SMRC1_HUMAN]	4.71	1	3	3	5	36.513	2.44	2	2	54.7067	3.62	2	3	1105	122.79	5.75732
P30153	Serine/threonine-protein phosphatase 2A 65 kDa regulatory subunit A alpha isoform OS=Homo sapiens GN=PPP2R1A PE=1 SV=4 - [2AAA_HUMAN]	3.4	1	1	1	1	36.38	3.4	1	1					589	65.2669	5.10986
Q9Y3F4	Serine-threonine kinase receptor-associated protein OS=Homo sapiens GN=STRAP PE=1 SV=1 - [STRAP_HUMAN]	4.29	1	1	1	2	36.14	4.29	1	1	22.04	4.29	1	1	350	38.414	5.12256
P19793	Retinoic acid receptor RXR-alpha OS=Homo sapiens GN=RXRA PE=1 SV=1 - [RXRA_HUMAN]	2.81	2	1	1	1	36.1	2.81	1	1					462	50.7785	7.79639
Q14566	DNA replication licensing factor MCM6 OS=Homo sapiens GN=MCM6 PE=1 SV=1 - [MCM6_HUMAN]	9.87	1	5	5	6	36.0032	3.53	2	2	78.55	6.33	3	4	821	92.8312	5.41455
Q9NYF8	Bcl-2-associated transcription factor 1 OS=Homo sapiens GN=BCLAF1 PE=1 SV=2 - [BCLF1_HUMAN]	1.74	1	1	1	2	35.97	1.74	1	2					920	106.059	9.979
Q93009	Ubiquitin carboxyl-terminal hydrolase 7 OS=Homo sapiens GN=USP7 PE=1 SV=2 - [UBP7_HUMAN]	1.09	1	1	1	1	35.64	1.09	1	1					1102	128.22	5.5542
O75832	26S proteasome non-ATPase regulatory subunit 10 OS=Homo sapiens GN=PSMD10 PE=1 SV=1 - [PSD10_HUMAN]	5.31	1	1	1	1	35.59	5.31	1	1					226	24.4124	6.1001
O15347	High mobility group protein B3 OS=Homo sapiens GN=HMGB3 PE=1 SV=4 - [HMGB3_HUMAN]	7	1	1	1	1	35.47	7	1	1					200	22.9654	8.36768
P13645	Keratin, type I cytoskeletal 10 OS=Homo sapiens GN=KRT10 PE=1 SV=6 - [K1C10_HUMAN]	3.25	1	2	2	3	35.0022	3.25	2	3					584	58.7917	5.21143
Q9NRX4	14 kDa phosphohistidine phosphatase OS=Homo sapiens GN=PHPT1 PE=1 SV=1 - [PHP14_HUMAN]	37.6	1	3	3	6	34.36	16.8	1	1	54.51	37.6	3	5	125	13.8237	6.07471
Q13243	Serine/arginine-rich splicing factor 5 OS=Homo sapiens GN=SRSF5 PE=1 SV=1 - [SRSF5_HUMAN]	3.31	3	1	1	1	34.16	3.31	1	1					272	31.2453	11.5903
Q969G3	SWI/SNF-related matrix-associated actin-dependent regulator of chromatin subfamily E member 1 OS=Homo sapiens GN=SMARCE1 PE=1 SV=2 - [SMCE1_HUMAN]	2.92	1	1	1	1	33.48	2.92	1	1					411	46.6206	4.88135
Q02241	Kinesin-like protein KIF23 OS=Homo sapiens GN=KIF23 PE=1 SV=3 - [KIF23_HUMAN]	1.88	1	1	1	2	33.38	1.88	1	2					960	109.99	8.51416
O43290	U4/U6.U5 tri-snRNP-associated protein 1 OS=Homo sapiens GN=SART1 PE=1 SV=1 - [SNUT1_HUMAN]	1.88	1	1	1	2	33.13	1.88	1	1	26.01	1.88	1	1	800	90.2003	6.12549
Q9Y265	RuvB-like 1 OS=Homo sapiens GN=RUVBL1 PE=1 SV=1 - [RUVB1_HUMAN]	6.36	1	2	2	2	33.06	2.19	1	1	25.38	4.17	1	1	456	50.1963	6.41748
P61326	Protein mago nashi homolog OS=Homo sapiens GN=MAGOH PE=1 SV=1 - [MGN_HUMAN]	11.64	2	1	1	1	33.01	11.64	1	1					146	17.1528	6.11279
O60264	SWI/SNF-related matrix-associated actin-dependent regulator of chromatin subfamily A member 5 OS=Homo sapiens GN=SMARCA5 PE=1 SV=1 - [SMCA5_HUMAN]	2.28	1	2	2	3	32.7503	2.28	2	3					1052	121.828	8.08936
P68400	Casein kinase II subunit alpha OS=Homo sapiens GN=CSNK2A1 PE=1 SV=1 - [CSK21_HUMAN]	9.21	2	2	2	4	32.3671	9.21	2	3	26.3	5.12	1	1	391	45.1148	7.73779
Q9C0J8	pre-mRNA 3' end processing protein WDR33 OS=Homo sapiens GN=WDR33 PE=1 SV=2 - [WDR33_HUMAN]	0.75	1	1	1	1	32.16	0.75	1	1					1336	145.799	9.17334
Q5VTL8	Pre-mRNA-splicing factor 38B OS=Homo sapiens GN=PRPF38B PE=1 SV=1 - [PR38B_HUMAN]	2.2	1	1	1	1	32.14	2.2	1	1					546	64.4292	10.5356
Q15029	116 kDa U5 small nuclear ribonucleoprotein component OS=Homo sapiens GN=EFTUD2 PE=1 SV=1 - [U5S1_HUMAN]	4.12	1	3	3	5	31.901	3.19	2	3	29.11	2.26	2	2	972	109.366	4.99561
P63167	Dynein light chain 1, cytoplasmic OS=Homo sapiens GN=DYNLL1 PE=1 SV=1 - [DYL1_HUMAN]	13.48	1	1	1	1	31.52	13.48	1	1					89	10.3591	7.40088
Q14168	MAGUK p55 subfamily member 2 OS=Homo sapiens GN=MPP2 PE=1 SV=3 - [MPP2_HUMAN]	1.74	1	1	1	1	31.31	1.74	1	1					576	64.5403	6.771
Q9Y5Q8	General transcription factor 3C polypeptide 5 OS=Homo sapiens GN=GTF3C5 PE=1 SV=2 - [TF3C5_HUMAN]	3.08	1	1	1	2	30.65	3.08	1	1	24.4	3.08	1	1	519	59.5331	6.90283
P55265	Double-stranded RNA-specific adenosine deaminase OS=Homo sapiens GN=ADAR PE=1 SV=4 - [DSRAD_HUMAN]	0.82	1	1	1	1	30.65	0.82	1	1					1226	135.981	8.646
P15531	Nucleoside diphosphate kinase A OS=Homo sapiens GN=NME1 PE=1 SV=1 - [NDKA_HUMAN]	19.08	3	2	2	2	30.59	19.08	2	2					152	17.1377	6.18896
Q9BXJ9	N-alpha-acetyltransferase 15, NatA auxiliary subunit OS=Homo sapiens GN=NAA15 PE=1 SV=1 - [NAA15_HUMAN]	1.15	1	1	1	1	30.48	1.15	1	1					866	101.208	7.41553
P62314	Small nuclear ribonucleoprotein Sm D1 OS=Homo sapiens GN=SNRPD1 PE=1 SV=1 - [SMD1_HUMAN]	9.24	1	1	1	1	29.81	9.24	1	1					119	13.2734	11.561
Q9H307	Pinin OS=Homo sapiens GN=PNN PE=1 SV=4 - [PININ_HUMAN]	2.37	1	1	1	2	29.46	2.37	1	2					717	81.565	7.13721
Q9Y5S9	RNA-binding protein 8A OS=Homo sapiens GN=RBM8A PE=1 SV=1 - [RBM8A_HUMAN]	6.32	1	1	1	1	29.46	6.32	1	1					174	19.8767	5.71924
Q9Y266	Nuclear migration protein nudC OS=Homo sapiens GN=NUDC PE=1 SV=1 - [NUDC_HUMAN]	8.16	1	2	2	3	29.4489	8.16	2	2	33.58	4.53	1	1	331	38.2191	5.37646
Q8TAQ2	SWI/SNF complex subunit SMARCC2 OS=Homo sapiens GN=SMARCC2 PE=1 SV=1 - [SMRC2_HUMAN]	2.64	1	2	2	2	29.41	1.24	1	1	24.06	1.4	1	1	1214	132.797	5.69385
Q9UQ80	Proliferation-associated protein 2G4 OS=Homo sapiens GN=PA2G4 PE=1 SV=3 - [PA2G4_HUMAN]	3.3	1	1	1	1	29.04	3.3	1	1					394	43.7592	6.55127
Q16666	Gamma-interferon-inducible protein 16 OS=Homo sapiens GN=IFI16 PE=1 SV=3 - [IF16_HUMAN]	4.59	1	2	2	2	28.85	2.17	1	1	22.08	2.42	1	1	785	88.1994	9.27588
Q13356	Peptidyl-prolyl cis-trans isomerase-like 2 OS=Homo sapiens GN=PPIL2 PE=1 SV=1 - [PPIL2_HUMAN]	2.5	1	1	1	1	28.67	2.5	1	1					520	58.7866	8.77783
Q9UKL0	REST corepressor 1 OS=Homo sapiens GN=RCOR1 PE=1 SV=1 - [RCOR1_HUMAN]	2.49	2	1	1	1	28.08	2.49	1	1					482	52.9955	7.03467
O15164	Transcription intermediary factor 1-alpha OS=Homo sapiens GN=TRIM24 PE=1 SV=3 - [TIF1A_HUMAN]	0.86	1	1	1	1	28.08	0.86	1	1					1050	116.757	7.10791
Q15393	Splicing factor 3B subunit 3 OS=Homo sapiens GN=SF3B3 PE=1 SV=4 - [SF3B3_HUMAN]	1.23	1	1	1	1	28	1.23	1	1					1217	135.492	5.26221
P23526	Adenosylhomocysteinase OS=Homo sapiens GN=AHCY PE=1 SV=4 - [SAHH_HUMAN]	3.47	1	1	1	1	28	3.47	1	1					432	47.6852	6.34131
Q12789	General transcription factor 3C polypeptide 1 OS=Homo sapiens GN=GTF3C1 PE=1 SV=4 - [TF3C1_HUMAN]	1.99	1	2	2	2	27.89	0.71	1	1	38.97	1.28	1	1	2109	238.725	7.29834
P54646	5'-AMP-activated protein kinase catalytic subunit alpha-2 OS=Homo sapiens GN=PRKAA2 PE=1 SV=2 - [AAPK2_HUMAN]	2.9	2	1	1	1	27.34	2.9	1	1					552	62.2796	7.75244
Q15020	Squamous cell carcinoma antigen recognized by T-cells 3 OS=Homo sapiens GN=SART3 PE=1 SV=1 - [SART3_HUMAN]	1.45	1	1	1	1	27.25	1.45	1	1					963	109.865	5.56689
Q5BKZ1	DBIRD complex subunit ZNF326 OS=Homo sapiens GN=ZNF326 PE=1 SV=2 - [ZN326_HUMAN]	3.09	1	1	1	2	26.9	3.09	1	2					582	65.6131	5.14795
Q96FJ2	Dynein light chain 2, cytoplasmic OS=Homo sapiens GN=DYNLL2 PE=1 SV=1 - [DYL2_HUMAN]	13.48	1	1	1	1	26.7	13.48	1	1					89	10.3431	7.37158
O75937	DnaJ homolog subfamily C member 8 OS=Homo sapiens GN=DNAJC8 PE=1 SV=2 - [DNJC8_HUMAN]	6.32	1	1	1	1	26.69	6.32	1	1					253	29.8234	9.05615
P27635	60S ribosomal protein L10 OS=Homo sapiens GN=RPL10 PE=1 SV=4 - [RL10_HUMAN]	9.35	2	3	3	3	26.497	9.35	2	2	29.61	6.07	1	1	214	24.5879	10.0815
Q8NG31	Protein CASC5 OS=Homo sapiens GN=CASC5 PE=1 SV=3 - [CASC5_HUMAN]	0.43	1	1	1	1	26.47	0.43	1	1					2342	265.224	5.46533
Q9H3K6	BolA-like protein 2 OS=Homo sapiens GN=BOLA2 PE=1 SV=1 - [BOLA2_HUMAN]	18.6	1	1	1	1	26.26	18.6	1	1					86	10.1102	6.52197
P62829	60S ribosomal protein L23 OS=Homo sapiens GN=RPL23 PE=1 SV=1 - [RL23_HUMAN]	5.71	1	1	1	2	26.0195	5.71	1	2					140	14.8561	10.5063
P47755	F-actin-capping protein subunit alpha-2 OS=Homo sapiens GN=CAPZA2 PE=1 SV=3 - [CAZA2_HUMAN]	3.5	2	1	1	1	26.01	3.5	1	1					286	32.9286	5.84619
Q8WXX5	DnaJ homolog subfamily C member 9 OS=Homo sapiens GN=DNAJC9 PE=1 SV=1 - [DNJC9_HUMAN]	4.62	1	1	1	1	25.94	4.62	1	1					260	29.8911	5.73193
Q9NVI1	Fanconi anemia group I protein OS=Homo sapiens GN=FANCI PE=1 SV=4 - [FANCI_HUMAN]	0.75	1	1	1	1	25.81	0.75	1	1					1328	149.229	6.7417
O60563	Cyclin-T1 OS=Homo sapiens GN=CCNT1 PE=1 SV=1 - [CCNT1_HUMAN]	5.23	1	2	2	2	25.76	1.65	1	1	40.14	3.58	1	1	726	80.6345	8.77783
Q9H0C8	Integrin-linked kinase-associated serine/threonine phosphatase 2C OS=Homo sapiens GN=ILKAP PE=1 SV=1 - [ILKAP_HUMAN]	3.57	1	1	1	1	25.04	3.57	1	1					392	42.8798	7.09326
Q9Y224	UPF0568 protein C14orf166 OS=Homo sapiens GN=C14orf166 PE=1 SV=1 - [CN166_HUMAN]	3.28	1	1	1	1	24.98	3.28	1	1					244	28.0507	6.65381
P19784	Casein kinase II subunit alpha' OS=Homo sapiens GN=CSNK2A2 PE=1 SV=1 - [CSK22_HUMAN]	3.71	1	1	1	1	24.98	3.71	1	1					350	41.1871	8.55811
P46109	Crk-like protein OS=Homo sapiens GN=CRKL PE=1 SV=1 - [CRKL_HUMAN]	4.95	1	1	1	1	24.83	4.95	1	1					303	33.7559	6.7417
O15294	UDP-N-acetylglucosamine--peptide N-acetylglucosaminyltransferase 110 kDa subunit OS=Homo sapiens GN=OGT PE=1 SV=3 - [OGT1_HUMAN]	1.91	1	1	1	1	24.67	1.91	1	1					1046	116.85	6.69775
Q15773	Myeloid leukemia factor 2 OS=Homo sapiens GN=MLF2 PE=1 SV=1 - [MLF2_HUMAN]	7.26	1	1	1	1	24.47	7.26	1	1					248	28.1292	6.90283
Q92530	Proteasome inhibitor PI31 subunit OS=Homo sapiens GN=PSMF1 PE=1 SV=2 - [PSMF1_HUMAN]	5.54	1	1	1	1	24.42	5.54	1	1					271	29.798	5.74463
Q02878	60S ribosomal protein L6 OS=Homo sapiens GN=RPL6 PE=1 SV=3 - [RL6_HUMAN]	2.78	1	1	1	1	24.24	2.78	1	1					288	32.7076	10.5796
O95235	Kinesin-like protein KIF20A OS=Homo sapiens GN=KIF20A PE=1 SV=1 - [KI20A_HUMAN]	1.46	1	1	1	1	24.16	1.46	1	1					890	100.215	6.91748
Q9Y3B2	Exosome complex component CSL4 OS=Homo sapiens GN=EXOSC1 PE=1 SV=1 - [EXOS1_HUMAN]	5.64	1	1	1	1	24.1	5.64	1	1					195	21.438	8.23584
P50990	T-complex protein 1 subunit theta OS=Homo sapiens GN=CCT8 PE=1 SV=4 - [TCPQ_HUMAN]	2.55	1	1	1	1	23.81	2.55	1	1					548	59.5825	5.60498
Q7Z2T5	TRMT1-like protein OS=Homo sapiens GN=TRMT1L PE=1 SV=2 - [TRM1L_HUMAN]	1.36	1	1	1	1	23.75	1.36	1	1					733	81.6952	7.88428
Q9NTZ6	RNA-binding protein 12 OS=Homo sapiens GN=RBM12 PE=1 SV=1 - [RBM12_HUMAN]	2.15	1	2	2	2	23.53	0.75	1	1	25.53	1.39	1	1	932	97.3334	8.63135
Q6STE5	SWI/SNF-related matrix-associated actin-dependent regulator of chromatin subfamily D member 3 OS=Homo sapiens GN=SMARCD3 PE=1 SV=1 - [SMRD3_HUMAN]	2.48	2	1	1	1	23.51	2.48	1	1					483	54.9814	9.34912
Q86U42	Polyadenylate-binding protein 2 OS=Homo sapiens GN=PABPN1 PE=1 SV=3 - [PABP2_HUMAN]	4.58	1	1	1	1	23.48	4.58	1	1					306	32.729	5.05908
Q99549	M-phase phosphoprotein 8 OS=Homo sapiens GN=MPHOSPH8 PE=1 SV=2 - [MPP8_HUMAN]	1.51	1	1	1	1	23.35	1.51	1	1					860	97.1228	6.06201
P28340	DNA polymerase delta catalytic subunit OS=Homo sapiens GN=POLD1 PE=1 SV=2 - [DPOD1_HUMAN]	4.43	1	3	3	3	22.88	1.36	1	1	43.9296	3.07	2	2	1107	123.553	7.03467
P10768	S-formylglutathione hydrolase OS=Homo sapiens GN=ESD PE=1 SV=2 - [ESTD_HUMAN]	7.8	1	1	1	4	22.06	7.8	1	1	56.5064	7.8	1	3	282	31.4425	7.02002
P25398	40S ribosomal protein S12 OS=Homo sapiens GN=RPS12 PE=1 SV=3 - [RS12_HUMAN]	6.06	1	1	1	2	21.92	6.06	1	2					132	14.5055	7.21045
O14929	Histone acetyltransferase type B catalytic subunit OS=Homo sapiens GN=HAT1 PE=1 SV=1 - [HAT1_HUMAN]	5.01	1	2	2	4	21.81	1.91	1	1	62.2433	3.1	1	3	419	49.4808	5.69385
Q9Y4E6	WD repeat-containing protein 7 OS=Homo sapiens GN=WDR7 PE=1 SV=2 - [WDR7_HUMAN]	0.6	1	1	1	1	21.18	0.6	1	1					1490	163.705	6.91748
P62191	26S protease regulatory subunit 4 OS=Homo sapiens GN=PSMC1 PE=1 SV=1 - [PRS4_HUMAN]	2.95	1	1	1	1	20.62	2.95	1	1					440	49.1537	6.21436
Q14119	Vascular endothelial zinc finger 1 OS=Homo sapiens GN=VEZF1 PE=1 SV=2 - [VEZF1_HUMAN]	2.3	1	1	1	1	0	2.3	1	1					521	56.8947	9.5249
Q96MX3	Zinc finger protein 48 OS=Homo sapiens GN=ZNF48 PE=1 SV=2 - [ZNF48_HUMAN]	1.62	1	1	1	1					22.51	1.62	1	1	618	67.777	9.36377
P50914	60S ribosomal protein L14 OS=Homo sapiens GN=RPL14 PE=1 SV=4 - [RL14_HUMAN]	5.58	1	1	1	1					43.89	5.58	1	1	215	23.417	10.9312
Q92890	Ubiquitin fusion degradation protein 1 homolog OS=Homo sapiens GN=UFD1L PE=1 SV=3 - [UFD1_HUMAN]	7.82	1	1	1	1					20.41	7.82	1	1	307	34.4783	6.69775
Q6NSI4	Uncharacterized protein CXorf57 OS=Homo sapiens GN=CXorf57 PE=1 SV=2 - [CX057_HUMAN]	2.81	1	1	1	2					42.8246	2.81	1	2	855	97.4929	8.41162
Q15269	Periodic tryptophan protein 2 homolog OS=Homo sapiens GN=PWP2 PE=1 SV=2 - [PWP2_HUMAN]	2.72	1	1	1	1					26.39	2.72	1	1	919	102.387	6.15088
Q13619	Cullin-4A OS=Homo sapiens GN=CUL4A PE=1 SV=3 - [CUL4A_HUMAN]	1.45	2	1	1	1					23.74	1.45	1	1	759	87.6244	8.1333
O95232	Luc7-like protein 3 OS=Homo sapiens GN=LUC7L3 PE=1 SV=2 - [LC7L3_HUMAN]	5.79	1	2	2	2					27.9582	5.79	2	2	432	51.4351	9.78857
O75367	Core histone macro-H2A.1 OS=Homo sapiens GN=H2AFY PE=1 SV=4 - [H2AY_HUMAN]	8.06	1	2	2	2					38.6754	8.06	2	2	372	39.5925	9.78857
Q9NRZ9	Lymphoid-specific helicase OS=Homo sapiens GN=HELLS PE=1 SV=1 - [HELLS_HUMAN]	1.55	1	1	1	2					36.06	1.55	1	2	838	97.0122	7.92822
Q86XP3	ATP-dependent RNA helicase DDX42 OS=Homo sapiens GN=DDX42 PE=1 SV=1 - [DDX42_HUMAN]	1.81	1	1	1	1					23.48	1.81	1	1	938	102.912	7.02002
Q86XI2	Condensin-2 complex subunit G2 OS=Homo sapiens GN=NCAPG2 PE=1 SV=1 - [CNDG2_HUMAN]	1.31	1	1	1	1					26.23	1.31	1	1	1143	130.876	6.87354
Q99459	Cell division cycle 5-like protein OS=Homo sapiens GN=CDC5L PE=1 SV=2 - [CDC5L_HUMAN]	2.74	1	1	1	1					23.9	2.74	1	1	802	92.1937	8.17725
Q01130	Serine/arginine-rich splicing factor 2 OS=Homo sapiens GN=SRSF2 PE=1 SV=4 - [SRSF2_HUMAN]	7.69	1	1	1	2					68.39	7.69	1	2	221	25.4612	11.854
P62942	Peptidyl-prolyl cis-trans isomerase FKBP1A OS=Homo sapiens GN=FKBP1A PE=1 SV=2 - [FKB1A_HUMAN]	12.96	1	1	1	5					71.71	12.96	1	5	108	11.9431	8.1626
P62316	Small nuclear ribonucleoprotein Sm D2 OS=Homo sapiens GN=SNRPD2 PE=1 SV=1 - [SMD2_HUMAN]	16.1	1	1	1	1					24	16.1	1	1	118	13.5182	9.90576
P62857	40S ribosomal protein S28 OS=Homo sapiens GN=RPS28 PE=1 SV=1 - [RS28_HUMAN]	17.39	1	1	1	1					35.63	17.39	1	1	69	7.8362	10.6968
P27708	CAD protein OS=Homo sapiens GN=CAD PE=1 SV=3 - [PYR1_HUMAN]	0.63	1	1	1	1					0	0.63	1	1	2225	242.829	6.45557
O96019	Actin-like protein 6A OS=Homo sapiens GN=ACTL6A PE=1 SV=1 - [ACL6A_HUMAN]	4.2	1	1	1	1					27.38	4.2	1	1	429	47.4303	5.60498
Q9BXP5	Serrate RNA effector molecule homolog OS=Homo sapiens GN=SRRT PE=1 SV=1 - [SRRT_HUMAN]	1.26	1	1	1	1					0	1.26	1	1	876	100.604	5.96045
Q9UNF1	Melanoma-associated antigen D2 OS=Homo sapiens GN=MAGED2 PE=1 SV=2 - [MAGD2_HUMAN]	1.82	1	1	1	1					33.16	1.82	1	1	606	64.9144	9.31982
Q9UNP9	Peptidyl-prolyl cis-trans isomerase E OS=Homo sapiens GN=PPIE PE=1 SV=1 - [PPIE_HUMAN]	4.98	1	1	1	1					32.6	4.98	1	1	301	33.4096	5.60498
O75347	Tubulin-specific chaperone A OS=Homo sapiens GN=TBCA PE=1 SV=3 - [TBCA_HUMAN]	16.67	1	1	1	1					22.53	16.67	1	1	108	12.8467	5.2876
Q08945	FACT complex subunit SSRP1 OS=Homo sapiens GN=SSRP1 PE=1 SV=1 - [SSRP1_HUMAN]	3.24	1	2	2	3					68.017	3.24	2	3	709	81.0244	6.87354
P25705	ATP synthase subunit alpha, mitochondrial OS=Homo sapiens GN=ATP5A1 PE=1 SV=1 - [ATPA_HUMAN]	2.17	1	1	1	1					24.62	2.17	1	1	553	59.7136	9.12939
P49327	Fatty acid synthase OS=Homo sapiens GN=FASN PE=1 SV=3 - [FAS_HUMAN]	0.96	1	1	1	1					22.63	0.96	1	1	2511	273.254	6.44287
O75533	Splicing factor 3B subunit 1 OS=Homo sapiens GN=SF3B1 PE=1 SV=3 - [SF3B1_HUMAN]	3.07	1	2	2	2					28.39	3.07	2	2	1304	145.738	7.09326
O00139	Kinesin-like protein KIF2A OS=Homo sapiens GN=KIF2A PE=1 SV=3 - [KIF2A_HUMAN]	2.69	1	1	1	2					33.05	2.69	1	2	706	79.9046	6.68311
Q96G46	tRNA-dihydrouridine(47) synthase [NAD(P)(+)]-like OS=Homo sapiens GN=DUS3L PE=1 SV=2 - [DUS3L_HUMAN]	3.23	1	1	1	1					26.88	3.23	1	1	650	72.5479	8.04541
Q9Y2W1	Thyroid hormone receptor-associated protein 3 OS=Homo sapiens GN=THRAP3 PE=1 SV=2 - [TR150_HUMAN]	1.99	1	1	1	1					26.08	1.99	1	1	955	108.601	10.1548
Q9Y4F1	FERM, RhoGEF and pleckstrin domain-containing protein 1 OS=Homo sapiens GN=FARP1 PE=1 SV=1 - [FARP1_HUMAN]	1.91	1	1	1	1					29.13	1.91	1	1	1045	118.559	8.14795
Q9Y314	Nitric oxide synthase-interacting protein OS=Homo sapiens GN=NOSIP PE=1 SV=1 - [NOSIP_HUMAN]	3.65	1	1	1	2					26.7859	3.65	1	2	301	33.151	8.82178
Q96PK6	RNA-binding protein 14 OS=Homo sapiens GN=RBM14 PE=1 SV=2 - [RBM14_HUMAN]	3.59	1	1	1	2					26.3	3.59	1	2	669	69.4489	9.67139
O60341	Lysine-specific histone demethylase 1A OS=Homo sapiens GN=KDM1A PE=1 SV=2 - [KDM1A_HUMAN]	2.11	1	1	1	1					22.41	2.11	1	1	852	92.8447	6.52197
Q7L273	BTB/POZ domain-containing protein KCTD9 OS=Homo sapiens GN=KCTD9 PE=2 SV=1 - [KCTD9_HUMAN]	9	1	2	2	3					75.6287	9	2	3	389	42.5396	6.3667
P62195	26S protease regulatory subunit 8 OS=Homo sapiens GN=PSMC5 PE=1 SV=1 - [PRS8_HUMAN]	3.2	1	1	1	1					23.51	3.2	1	1	406	45.5971	7.54736
O75376	Nuclear receptor corepressor 1 OS=Homo sapiens GN=NCOR1 PE=1 SV=2 - [NCOR1_HUMAN]	1.6	1	2	2	2					26.97	1.6	2	2	2440	270.044	7.10791
P61289	Proteasome activator complex subunit 3 OS=Homo sapiens GN=PSME3 PE=1 SV=1 - [PSME3_HUMAN]	4.72	1	1	1	1					28.71	4.72	1	1	254	29.4876	5.94775
Q9BQA1	Methylosome protein 50 OS=Homo sapiens GN=WDR77 PE=1 SV=1 - [MEP50_HUMAN]	7.02	1	1	1	1					29.37	7.02	1	1	342	36.7011	5.17334
O75717	WD repeat and HMG-box DNA-binding protein 1 OS=Homo sapiens GN=WDHD1 PE=1 SV=1 - [WDHD1_HUMAN]	2.21	1	2	2	2					29.27	2.21	2	2	1129	125.888	5.61768
Q9Y230	RuvB-like 2 OS=Homo sapiens GN=RUVBL2 PE=1 SV=3 - [RUVB2_HUMAN]	5.83	1	1	1	1					23.06	5.83	1	1	463	51.1246	5.64307
Q14498	RNA-binding protein 39 OS=Homo sapiens GN=RBM39 PE=1 SV=2 - [RBM39_HUMAN]	5.85	1	2	2	5					89.5	5.85	2	5	530	59.3427	10.0962
P52209	6-phosphogluconate dehydrogenase, decarboxylating OS=Homo sapiens GN=PGD PE=1 SV=3 - [6PGD_HUMAN]	3.52	1	1	1	1					35.81	3.52	1	1	483	53.106	7.2251
P58546	Myotrophin OS=Homo sapiens GN=MTPN PE=1 SV=2 - [MTPN_HUMAN]	14.41	1	1	1	2					37.55	14.41	1	2	118	12.8866	5.51611
P78347	General transcription factor II-I OS=Homo sapiens GN=GTF2I PE=1 SV=2 - [GTF2I_HUMAN]	4.01	1	2	3	4					36.2	4.01	3	4	998	112.346	6.39209
Q15366	Poly(rC)-binding protein 2 OS=Homo sapiens GN=PCBP2 PE=1 SV=1 - [PCBP2_HUMAN]	13.97	2	1	2	3					54.1967	13.97	2	3	365	38.5556	6.78564
P48539	Purkinje cell protein 4 OS=Homo sapiens GN=PCP4 PE=1 SV=3 - [PCP4_HUMAN]	27.42	1	1	1	1					20.63	27.42	1	1	62	6.7873	6.7124
P49915	GMP synthase [glutamine-hydrolyzing] OS=Homo sapiens GN=GMPS PE=1 SV=1 - [GUAA_HUMAN]	2.6	1	1	1	1					37.55	2.6	1	1	693	76.667	6.87354
P25787	Proteasome subunit alpha type-2 OS=Homo sapiens GN=PSMA2 PE=1 SV=2 - [PSA2_HUMAN]	8.12	1	1	1	1					27.83	8.12	1	1	234	25.8823	7.43018
P28288	ATP-binding cassette sub-family D member 3 OS=Homo sapiens GN=ABCD3 PE=1 SV=1 - [ABCD3_HUMAN]	2.88	1	1	1	1					47.39	2.88	1	1	659	75.4276	9.36377
P08263	Glutathione S-transferase A1 OS=Homo sapiens GN=GSTA1 PE=1 SV=3 - [GSTA1_HUMAN]	5.86	3	1	1	1					24.45	5.86	1	1	222	25.6147	8.88037
P09972	Fructose-bisphosphate aldolase C OS=Homo sapiens GN=ALDOC PE=1 SV=2 - [ALDOC_HUMAN]	7.14	1	1	1	1					32.25	7.14	1	1	364	39.4312	6.87354
O60828	Polyglutamine-binding protein 1 OS=Homo sapiens GN=PQBP1 PE=1 SV=1 - [PQBP1_HUMAN]	6.79	1	1	1	1					24.57	6.79	1	1	265	30.454	6.32861
Q86U86	Protein polybromo-1 OS=Homo sapiens GN=PBRM1 PE=1 SV=1 - [PB1_HUMAN]	2.37	1	2	2	2					40.63	2.37	2	2	1689	192.825	6.88818
P40763	Signal transducer and activator of transcription 3 OS=Homo sapiens GN=STAT3 PE=1 SV=2 - [STAT3_HUMAN]	2.73	1	1	1	1					28.48	2.73	1	1	770	88.0114	6.30322
Q9HCS7	Pre-mRNA-splicing factor SYF1 OS=Homo sapiens GN=XAB2 PE=1 SV=2 - [SYF1_HUMAN]	2.34	1	1	1	1					34.94	2.34	1	1	855	99.9464	6.22705
Q9H2P0	Activity-dependent neuroprotector homeobox protein OS=Homo sapiens GN=ADNP PE=1 SV=1 - [ADNP_HUMAN]	1.36	1	1	1	1					30.82	1.36	1	1	1102	123.485	7.34229
O95340	Bifunctional 3'-phosphoadenosine 5'-phosphosulfate synthase 2 OS=Homo sapiens GN=PAPSS2 PE=1 SV=2 - [PAPS2_HUMAN]	1.79	1	1	1	1					20.21	1.79	1	1	614	69.4566	8.03076
O43396	Thioredoxin-like protein 1 OS=Homo sapiens GN=TXNL1 PE=1 SV=3 - [TXNL1_HUMAN]	7.61	1	1	1	1					38.69	7.61	1	1	289	32.2307	4.95752
O60884	DnaJ homolog subfamily A member 2 OS=Homo sapiens GN=DNAJA2 PE=1 SV=1 - [DNJA2_HUMAN]	6.07	1	1	1	2					68.64	6.07	1	2	412	45.7166	6.48096
Q09161	Nuclear cap-binding protein subunit 1 OS=Homo sapiens GN=NCBP1 PE=1 SV=1 - [NCBP1_HUMAN]	2.66	1	1	1	2					61.5879	2.66	1	2	790	91.7805	6.43018
P40424	Pre-B-cell leukemia transcription factor 1 OS=Homo sapiens GN=PBX1 PE=1 SV=1 - [PBX1_HUMAN]	6.74	1	1	1	1					20.56	6.74	1	1	430	46.5968	7.03467
P06576	ATP synthase subunit beta, mitochondrial OS=Homo sapiens GN=ATP5B PE=1 SV=3 - [ATPB_HUMAN]	3.59	1	1	1	1					20.88	3.59	1	1	529	56.5246	5.40186
Q8N108	Mesoderm induction early response protein 1 OS=Homo sapiens GN=MIER1 PE=1 SV=2 - [MIER1_HUMAN]	4.69	1	1	1	1					22.39	4.69	1	1	512	57.9477	4.42432
P60174	Triosephosphate isomerase OS=Homo sapiens GN=TPI1 PE=1 SV=3 - [TPIS_HUMAN]	4.55	1	1	1	1					22.22	4.55	1	1	286	30.7717	5.92236
Q8TBX8	Phosphatidylinositol 5-phosphate 4-kinase type-2 gamma OS=Homo sapiens GN=PIP4K2C PE=1 SV=3 - [PI42C_HUMAN]	2.14	1	1	1	1					29.66	2.14	1	1	421	47.2701	6.84424
O15320	cTAGE family member 5 OS=Homo sapiens GN=CTAGE5 PE=1 SV=4 - [CTGE5_HUMAN]	4.98	1	2	2	3					31.1697	4.98	2	3	804	90.9397	5.22412

## Sheet: N-20
Accession	Description	ΣCoverage	Σ# Proteins	Σ# Unique Peptides	Σ# Peptides	Σ# PSMs	Score Replicate1	Coverage Replicate1	# Peptides Replicate1	# PSM Replicate1	Score Replicate2	Coverage Replicate2	# Peptides Replicate2	# PSM Replicate2	# AAs	MW [kDa]	calc. pI
O00425	Insulin-like growth factor 2 mRNA-binding protein 3 OS=Homo sapiens GN=IGF2BP3 PE=1 SV=2 - [IF2B3_HUMAN]	42.31	2	19	23	74	743.325	40.59	22	41	744.14	33.16	17	33	579	63.6656	8.86572
Q15233	Non-POU domain-containing octamer-binding protein OS=Homo sapiens GN=NONO PE=1 SV=4 - [NONO_HUMAN]	46.28	2	21	25	95	675.491	33.97	15	29	979.378	46.28	23	66	471	54.1973	8.95361
P13645	Keratin, type I cytoskeletal 10 OS=Homo sapiens GN=KRT10 PE=1 SV=6 - [K1C10_HUMAN]	35.1	15	18	22	64	629.216	26.03	16	28	826.393	33.56	19	36	584	58.7917	5.21143
Q96S66	Chloride channel CLIC-like protein 1 OS=Homo sapiens GN=CLCC1 PE=1 SV=1 - [CLCC1_HUMAN]	43.92	2	23	23	71	555.27	31.22	16	37	563.64	40.83	20	34	551	61.9831	5.5542
Q96FV2	Secernin-2 OS=Homo sapiens GN=SCRN2 PE=1 SV=3 - [SCRN2_HUMAN]	28.71	1	11	11	41	417.885	27.53	10	23	447.712	27.76	10	18	425	46.5672	5.66846
P01616	Ig kappa chain V-II region MIL OS=Homo sapiens PE=1 SV=1 - [KV203_HUMAN]	11.61	5	1	1	21	304.275	11.61	1	20	33.07	11.61	1	1	112	12.0481	9.29053
Q9NZI8	Insulin-like growth factor 2 mRNA-binding protein 1 OS=Homo sapiens GN=IGF2BP1 PE=1 SV=2 - [IF2B1_HUMAN]	27.9	1	9	14	34	275.038	19.76	9	16	396.341	22.53	11	18	577	63.4412	9.20264
P22736	Nuclear receptor subfamily 4 group A member 1 OS=Homo sapiens GN=NR4A1 PE=1 SV=1 - [NR4A1_HUMAN]	17.22	1	8	9	30	271.295	12.37	6	14	254.266	17.22	9	16	598	64.4222	7.1665
Q96E39	RNA binding motif protein, X-linked-like-1 OS=Homo sapiens GN=RBMXL1 PE=1 SV=1 - [RMXL1_HUMAN]	36.41	2	2	15	47	264.82	22.31	8	11	529.59	36.41	15	36	390	42.1162	9.89111
Q13263	Transcription intermediary factor 1-beta OS=Homo sapiens GN=TRIM28 PE=1 SV=5 - [TIF1B_HUMAN]	25.87	1	15	15	24	256.789	22.51	13	15	187.986	13.65	8	9	835	88.4934	5.77002
Q14103	Heterogeneous nuclear ribonucleoprotein D0 OS=Homo sapiens GN=HNRNPD PE=1 SV=1 - [HNRPD_HUMAN]	34.65	1	11	13	43	253.35	22.54	6	10	759.483	27.61	11	33	355	38.4103	7.81104
Q15717	ELAV-like protein 1 OS=Homo sapiens GN=ELAVL1 PE=1 SV=2 - [ELAV1_HUMAN]	35.28	1	9	10	24	251.87	19.63	6	9	385.023	35.28	10	15	326	36.0692	9.17334
Q15366	Poly(rC)-binding protein 2 OS=Homo sapiens GN=PCBP2 PE=1 SV=1 - [PCBP2_HUMAN]	34.79	3	4	10	28	250.841	23.84	8	11	418.129	33.42	8	17	365	38.5556	6.78564
Q15365	Poly(rC)-binding protein 1 OS=Homo sapiens GN=PCBP1 PE=1 SV=2 - [PCBP1_HUMAN]	31.74	3	5	10	33	246.3	22.19	8	11	527.572	30.34	9	22	356	37.4739	7.09326
P67809	Nuclease-sensitive element-binding protein 1 OS=Homo sapiens GN=YBX1 PE=1 SV=3 - [YBOX1_HUMAN]	45.06	2	6	8	15	242.098	32.1	6	7	175.811	29.32	4	8	324	35.9027	9.87646
Q96PK6	RNA-binding protein 14 OS=Homo sapiens GN=RBM14 PE=1 SV=2 - [RBM14_HUMAN]	20.93	1	14	14	33	234.633	12.26	8	10	459.508	20.93	14	23	669	69.4489	9.67139
Q96AE4	Far upstream element-binding protein 1 OS=Homo sapiens GN=FUBP1 PE=1 SV=3 - [FUBP1_HUMAN]	42.55	2	16	23	52	226.243	23.6	15	19	619.775	33.54	18	33	644	67.5185	7.60596
Q12906	Interleukin enhancer-binding factor 3 OS=Homo sapiens GN=ILF3 PE=1 SV=3 - [ILF3_HUMAN]	34.79	2	18	19	34	221.985	19.57	12	15	324.005	31.21	16	19	894	95.2791	8.76318
Q14980	Nuclear mitotic apparatus protein 1 OS=Homo sapiens GN=NUMA1 PE=1 SV=2 - [NUMA1_HUMAN]	6.67	1	9	10	12	213.257	4.73	7	8	58.2186	2.74	4	4	2115	238.115	5.78271
Q96DH6	RNA-binding protein Musashi homolog 2 OS=Homo sapiens GN=MSI2 PE=1 SV=1 - [MSI2H_HUMAN]	23.48	1	5	6	20	208.555	18.9	4	8	316.183	23.48	6	12	328	35.1741	8.48486
Q13148	TAR DNA-binding protein 43 OS=Homo sapiens GN=TARDBP PE=1 SV=1 - [TADBP_HUMAN]	20.05	1	7	9	21	202.751	16.43	7	10	232.567	18.12	8	11	414	44.7113	6.18896
P36578	60S ribosomal protein L4 OS=Homo sapiens GN=RPL4 PE=1 SV=5 - [RL4_HUMAN]	2.58	1	1	1	6	196.212	2.58	1	4	56.5382	2.58	1	2	427	47.6674	11.063
P11021	78 kDa glucose-regulated protein OS=Homo sapiens GN=HSPA5 PE=1 SV=2 - [GRP78_HUMAN]	20.18	1	8	10	21	192.521	20.18	10	11	253.563	14.37	7	10	654	72.2884	5.16064
P19338	Nucleolin OS=Homo sapiens GN=NCL PE=1 SV=3 - [NUCL_HUMAN]	23.52	1	15	15	21	192.447	18.03	10	10	176.238	14.37	10	11	710	76.5684	4.70361
P09874	Poly [ADP-ribose] polymerase 1 OS=Homo sapiens GN=PARP1 PE=1 SV=4 - [PARP1_HUMAN]	10.06	1	8	9	14	192.378	6.51	6	6	163.992	9.07	8	8	1014	113.012	8.88037
Q01130	Serine/arginine-rich splicing factor 2 OS=Homo sapiens GN=SRSF2 PE=1 SV=4 - [SRSF2_HUMAN]	19.91	2	2	5	15	190.8	16.29	4	7	204.661	16.74	4	8	221	25.4612	11.854
P13647	Keratin, type II cytoskeletal 5 OS=Homo sapiens GN=KRT5 PE=1 SV=3 - [K2C5_HUMAN]	23.56	6	7	14	25	187.517	17.46	11	13	235.708	15.93	9	12	590	62.34	7.73779
Q96I24	Far upstream element-binding protein 3 OS=Homo sapiens GN=FUBP3 PE=1 SV=2 - [FUBP3_HUMAN]	39.51	1	14	18	29	183.515	26.22	11	12	337.429	25.35	12	17	572	61.6022	8.38232
P62258	14-3-3 protein epsilon OS=Homo sapiens GN=YWHAE PE=1 SV=1 - [1433E_HUMAN]	26.27	2	3	6	9	178.19	23.14	5	5	87.4805	9.8	3	4	255	29.1554	4.7417
Q92574	Hamartin OS=Homo sapiens GN=TSC1 PE=1 SV=2 - [TSC1_HUMAN]	13.14	1	12	12	19	171.695	9.02	9	10	232.526	7.9	7	9	1164	129.685	6.46826
Q07955	Serine/arginine-rich splicing factor 1 OS=Homo sapiens GN=SRSF1 PE=1 SV=2 - [SRSF1_HUMAN]	39.52	1	10	10	30	170.878	35.89	9	11	371.731	39.52	10	19	248	27.7278	10.3599
P46063	ATP-dependent DNA helicase Q1 OS=Homo sapiens GN=RECQL PE=1 SV=3 - [RECQ1_HUMAN]	8.94	1	5	5	8	167.355	7.4	4	4	92.71	7.09	4	4	649	73.41	7.88428
Q9NZB2	Constitutive coactivator of PPAR-gamma-like protein 1 OS=Homo sapiens GN=FAM120A PE=1 SV=2 - [F120A_HUMAN]	7.87	1	7	7	13	165.782	6.89	6	9	64.44	4.83	4	4	1118	121.811	8.88037
P20700	Lamin-B1 OS=Homo sapiens GN=LMNB1 PE=1 SV=2 - [LMNB1_HUMAN]	20.14	2	9	10	12	156.746	16.72	8	8	83.4412	6.83	4	4	586	66.3676	5.16064
P21333	Filamin-A OS=Homo sapiens GN=FLNA PE=1 SV=4 - [FLNA_HUMAN]	8.01	3	15	16	19	155.971	5.36	11	11	173.43	3.55	7	8	2647	280.564	6.06201
P25205	DNA replication licensing factor MCM3 OS=Homo sapiens GN=MCM3 PE=1 SV=3 - [MCM3_HUMAN]	14.85	1	8	9	15	155.806	9.16	6	8	98.9067	10.4	6	7	808	90.924	5.77002
P61981	14-3-3 protein gamma OS=Homo sapiens GN=YWHAG PE=1 SV=2 - [1433G_HUMAN]	23.48	2	2	6	11	152.311	20.24	5	6	91.0632	13.77	4	5	247	28.2849	4.89404
P06748	Nucleophosmin OS=Homo sapiens GN=NPM1 PE=1 SV=2 - [NPM_HUMAN]	31.29	1	6	6	9	151.359	31.29	6	7	43.7611	11.9	2	2	294	32.5548	4.77979
P10809	60 kDa heat shock protein, mitochondrial OS=Homo sapiens GN=HSPD1 PE=1 SV=2 - [CH60_HUMAN]	9.6	1	5	5	8	147.662	9.6	5	7	25.5	1.57	1	1	573	61.0164	5.87158
P02533	Keratin, type I cytoskeletal 14 OS=Homo sapiens GN=KRT14 PE=1 SV=4 - [K1C14_HUMAN]	27.12	16	5	11	20	144.046	13.98	6	9	279.086	23.09	9	11	472	51.5294	5.16064
Q5BKZ1	DBIRD complex subunit ZNF326 OS=Homo sapiens GN=ZNF326 PE=1 SV=2 - [ZN326_HUMAN]	20.27	1	8	9	19	142.458	11.34	5	9	191.86	12.89	6	10	582	65.6131	5.14795
Q9HCE1	Putative helicase MOV-10 OS=Homo sapiens GN=MOV10 PE=1 SV=2 - [MOV10_HUMAN]	14.76	1	11	12	21	141.046	9.47	8	8	321.84	11.07	9	13	1003	113.599	8.82178
P02538	Keratin, type II cytoskeletal 6A OS=Homo sapiens GN=KRT6A PE=1 SV=3 - [K2C6A_HUMAN]	29.96	7	2	15	24	140.67	12.94	8	9	321.672	23.76	11	15	564	60.0083	8.00146
P48668	Keratin, type II cytoskeletal 6C OS=Homo sapiens GN=KRT6C PE=1 SV=3 - [K2C6C_HUMAN]	28.19	7	1	14	23	140.67	12.94	8	9	291.542	21.99	10	14	564	59.9883	8.00146
P45973	Chromobox protein homolog 5 OS=Homo sapiens GN=CBX5 PE=1 SV=1 - [CBX5_HUMAN]	12.57	1	2	2	4	136.786	12.57	2	3	39.96	5.76	1	1	191	22.2111	5.85889
P35240	Merlin OS=Homo sapiens GN=NF2 PE=1 SV=1 - [MERL_HUMAN]	17.82	1	10	10	14	135.228	9.75	5	5	188.958	16.13	9	9	595	69.646	6.46826
Q9BUJ2	Heterogeneous nuclear ribonucleoprotein U-like protein 1 OS=Homo sapiens GN=HNRNPUL1 PE=1 SV=2 - [HNRL1_HUMAN]	18.34	1	12	13	24	132.822	8.53	6	7	304.951	18.34	12	17	856	95.6793	6.91748
Q9UQ80	Proliferation-associated protein 2G4 OS=Homo sapiens GN=PA2G4 PE=1 SV=3 - [PA2G4_HUMAN]	19.54	1	7	7	10	132.821	19.54	7	8	42.0814	7.36	2	2	394	43.7592	6.55127
P32119	Peroxiredoxin-2 OS=Homo sapiens GN=PRDX2 PE=1 SV=5 - [PRDX2_HUMAN]	32.83	1	6	8	14	130.985	27.27	7	8	103.158	28.28	5	6	198	21.8782	5.97314
P23396	40S ribosomal protein S3 OS=Homo sapiens GN=RPS3 PE=1 SV=2 - [RS3_HUMAN]	35.39	1	7	8	12	130.957	24.69	5	6	111.316	19.75	5	6	243	26.6714	9.65674
P08779	Keratin, type I cytoskeletal 16 OS=Homo sapiens GN=KRT16 PE=1 SV=4 - [K1C16_HUMAN]	26.43	15	6	12	19	129.957	7.4	4	7	254.623	22.41	10	12	473	51.2362	5.04639
P08107	Heat shock 70 kDa protein 1A/1B OS=Homo sapiens GN=HSPA1A PE=1 SV=5 - [HSP71_HUMAN]	14.66	3	6	8	11	126.25	9.2	5	5	105.731	11.08	6	6	641	70.009	5.65576
Q9BWF3	RNA-binding protein 4 OS=Homo sapiens GN=RBM4 PE=1 SV=1 - [RBM4_HUMAN]	15.11	1	1	5	7	122.742	15.11	5	5	88.7365	6.87	2	2	364	40.2887	7.07861
Q14498	RNA-binding protein 39 OS=Homo sapiens GN=RBM39 PE=1 SV=2 - [RBM39_HUMAN]	14.15	1	6	6	12	121.348	8.68	4	5	193.601	10.75	4	7	530	59.3427	10.0962
P38646	Stress-70 protein, mitochondrial OS=Homo sapiens GN=HSPA9 PE=1 SV=2 - [GRP75_HUMAN]	11.63	1	6	6	7	116.269	11.63	6	7					679	73.6348	6.16357
P62424	60S ribosomal protein L7a OS=Homo sapiens GN=RPL7A PE=1 SV=2 - [RL7A_HUMAN]	12.41	1	3	3	5	116.239	12.41	3	4	42.86	4.14	1	1	266	29.977	10.6089
P14678	Small nuclear ribonucleoprotein-associated proteins B and B' OS=Homo sapiens GN=SNRPB PE=1 SV=2 - [RSMB_HUMAN]	12.5	2	3	3	10	116.005	9.58	2	4	122.128	12.5	3	6	240	24.5937	11.1948
P63104	14-3-3 protein zeta/delta OS=Homo sapiens GN=YWHAZ PE=1 SV=1 - [1433Z_HUMAN]	20.82	2	2	5	9	114.23	12.65	3	3	138.155	20.82	5	6	245	27.7277	4.79248
Q07020	60S ribosomal protein L18 OS=Homo sapiens GN=RPL18 PE=1 SV=2 - [RL18_HUMAN]	28.19	1	5	5	9	111.538	22.87	4	4	218.662	19.15	3	5	188	21.6211	11.7222
P30086	Phosphatidylethanolamine-binding protein 1 OS=Homo sapiens GN=PEBP1 PE=1 SV=3 - [PEBP1_HUMAN]	26.2	1	3	3	9	110.863	26.2	3	3	174.993	26.2	3	6	187	21.0437	7.53271
O14657	Torsin-1B OS=Homo sapiens GN=TOR1B PE=1 SV=2 - [TOR1B_HUMAN]	18.45	1	6	6	12	109.65	6.25	2	2	173.475	18.45	6	10	336	37.9548	8.54346
P07195	L-lactate dehydrogenase B chain OS=Homo sapiens GN=LDHB PE=1 SV=2 - [LDHB_HUMAN]	15.27	1	4	4	6	106.417	15.27	4	5	29.02	4.79	1	1	334	36.6151	6.04932
P35241	Radixin OS=Homo sapiens GN=RDX PE=1 SV=1 - [RADI_HUMAN]	20.41	2	7	12	23	104.714	13.21	7	7	312.372	17.5	11	16	583	68.5214	6.3667
Q8NC51	Plasminogen activator inhibitor 1 RNA-binding protein OS=Homo sapiens GN=SERBP1 PE=1 SV=2 - [PAIRB_HUMAN]	7.11	1	2	2	5	104.656	7.11	2	3	88.08	3.92	1	2	408	44.9385	8.646
Q9BQ04	RNA-binding protein 4B OS=Homo sapiens GN=RBM4B PE=1 SV=1 - [RBM4B_HUMAN]	15.32	1	1	5	8	103.492	15.32	5	5	39.8521	6.96	2	3	359	40.1244	6.7417
P55072	Transitional endoplasmic reticulum ATPase OS=Homo sapiens GN=VCP PE=1 SV=4 - [TERA_HUMAN]	5.46	1	4	4	6	103.137	4.34	3	3	60.11	4.22	3	3	806	89.2657	5.26221
P07737	Profilin-1 OS=Homo sapiens GN=PFN1 PE=1 SV=2 - [PROF1_HUMAN]	34.29	1	4	4	11	100.838	28.57	3	4	207.913	34.29	4	7	140	15.0446	8.26514
Q16630	Cleavage and polyadenylation specificity factor subunit 6 OS=Homo sapiens GN=CPSF6 PE=1 SV=2 - [CPSF6_HUMAN]	12.34	1	5	6	11	100.563	9.98	5	5	248.999	7.44	3	6	551	59.1734	7.15186
Q14011	Cold-inducible RNA-binding protein OS=Homo sapiens GN=CIRBP PE=1 SV=1 - [CIRBP_HUMAN]	33.14	1	4	4	9	100.512	33.14	4	4	166.375	33.14	4	5	172	18.6367	9.51025
Q8WXF1	Paraspeckle component 1 OS=Homo sapiens GN=PSPC1 PE=1 SV=1 - [PSPC1_HUMAN]	30.02	2	11	14	18	100.499	12.24	5	5	212.394	26.58	12	13	523	58.7062	6.66846
P53004	Biliverdin reductase A OS=Homo sapiens GN=BLVRA PE=1 SV=2 - [BIEA_HUMAN]	15.88	1	4	4	8	100.477	15.88	4	5	53.6633	9.46	2	3	296	33.4073	6.44287
P10599	Thioredoxin OS=Homo sapiens GN=TXN PE=1 SV=3 - [THIO_HUMAN]	20.95	1	2	2	6	100.282	20.95	2	3	93.8388	20.95	2	3	105	11.7297	4.91943
P08621	U1 small nuclear ribonucleoprotein 70 kDa OS=Homo sapiens GN=SNRNP70 PE=1 SV=2 - [RU17_HUMAN]	22.2	1	8	9	19	99.2455	11.44	5	5	197.598	22.2	9	14	437	51.5258	9.93506
Q9UKM9	RNA-binding protein Raly OS=Homo sapiens GN=RALY PE=1 SV=1 - [RALY_HUMAN]	34.31	2	8	9	9	98.54	20.26	5	5	61.2323	14.05	4	4	306	32.4436	9.17334
Q99426	Tubulin-folding cofactor B OS=Homo sapiens GN=TBCB PE=1 SV=2 - [TBCB_HUMAN]	8.61	1	2	2	4	97.75	8.61	2	2	91.2444	8.61	2	2	244	27.3085	5.14795
Q9Y2X9	Zinc finger protein 281 OS=Homo sapiens GN=ZNF281 PE=1 SV=1 - [ZN281_HUMAN]	3.46	1	3	3	7	97.5562	2.46	2	3	90.4855	3.46	3	4	895	96.8547	8.48486
Q13242	Serine/arginine-rich splicing factor 9 OS=Homo sapiens GN=SRSF9 PE=1 SV=1 - [SRSF9_HUMAN]	36.2	1	8	8	20	96.4817	17.19	4	5	236.671	32.13	7	15	221	25.5264	8.646
P39023	60S ribosomal protein L3 OS=Homo sapiens GN=RPL3 PE=1 SV=2 - [RL3_HUMAN]	17.12	1	6	6	10	96.4572	6.45	3	4	104.788	15.38	5	6	403	46.0798	10.1841
O14979	Heterogeneous nuclear ribonucleoprotein D-like OS=Homo sapiens GN=HNRPDL PE=1 SV=3 - [HNRDL_HUMAN]	24.05	1	8	9	19	96.2902	15.95	4	5	283.399	19.52	8	14	420	46.4091	9.56885
Q27J81	Inverted formin-2 OS=Homo sapiens GN=INF2 PE=1 SV=2 - [INF2_HUMAN]	0.88	1	1	1	5	95.99	0.88	1	4	27.6	0.88	1	1	1249	135.54	5.37646
P20073	Annexin A7 OS=Homo sapiens GN=ANXA7 PE=1 SV=3 - [ANXA7_HUMAN]	7.38	1	3	3	9	95.8819	7.38	3	6	56.3522	5.53	2	3	488	52.7058	5.68115
P43354	Nuclear receptor subfamily 4 group A member 2 OS=Homo sapiens GN=NR4A2 PE=1 SV=1 - [NR4A2_HUMAN]	17.22	1	6	7	19	93.2201	11.04	5	7	132.546	17.22	7	12	598	66.5479	7.92822
P27348	14-3-3 protein theta OS=Homo sapiens GN=YWHAQ PE=1 SV=1 - [1433T_HUMAN]	15.92	2	1	4	8	92.9214	12.65	3	3	123.173	15.92	4	5	245	27.7468	4.77979
Q7L014	Probable ATP-dependent RNA helicase DDX46 OS=Homo sapiens GN=DDX46 PE=1 SV=2 - [DDX46_HUMAN]	7.86	1	6	7	11	92.17	2.33	2	2	173.198	7.86	7	9	1031	117.29	9.29053
P78527	DNA-dependent protein kinase catalytic subunit OS=Homo sapiens GN=PRKDC PE=1 SV=3 - [PRKDC_HUMAN]	2.5	1	10	10	11	91.3075	1.87	8	8	66.66	0.82	3	3	4128	468.788	7.12256
P16989	DNA-binding protein A OS=Homo sapiens GN=CSDA PE=1 SV=4 - [DBPA_HUMAN]	14.52	2	1	3	4	90.3836	14.52	3	3	22.49	6.99	1	1	372	40.066	9.77393
A0AV96	RNA-binding protein 47 OS=Homo sapiens GN=RBM47 PE=1 SV=2 - [RBM47_HUMAN]	6.91	1	3	3	9	90.1733	4.72	2	3	238.092	5.56	2	6	593	64.0582	7.6792
P13639	Elongation factor 2 OS=Homo sapiens GN=EEF2 PE=1 SV=4 - [EF2_HUMAN]	11.07	2	9	10	12	89.7855	6.18	6	7	72.47	5.94	5	5	858	95.277	6.82959
P62753	40S ribosomal protein S6 OS=Homo sapiens GN=RPS6 PE=1 SV=1 - [RS6_HUMAN]	14.06	1	3	3	5	87.27	9.24	2	2	96.4067	14.06	3	3	249	28.663	10.8433
B9A064	Immunoglobulin lambda-like polypeptide 5 OS=Homo sapiens GN=IGLL5 PE=2 SV=2 - [IGLL5_HUMAN]	10.75	2	1	2	6	86.118	3.74	1	3	62.797	10.75	2	3	214	23.0486	8.83643
P37108	Signal recognition particle 14 kDa protein OS=Homo sapiens GN=SRP14 PE=1 SV=2 - [SRP14_HUMAN]	10.29	1	1	1	1	85.31	10.29	1	1					136	14.5608	10.0376
O75643	U5 small nuclear ribonucleoprotein 200 kDa helicase OS=Homo sapiens GN=SNRNP200 PE=1 SV=2 - [U520_HUMAN]	3.18	1	5	5	6	84.88	2.76	4	5	24.2	0.42	1	1	2136	244.353	6.06201
P62241	40S ribosomal protein S8 OS=Homo sapiens GN=RPS8 PE=1 SV=2 - [RS8_HUMAN]	21.15	1	4	4	7	83.35	21.15	4	4	39.4507	11.54	2	3	208	24.1902	10.3159
P15880	40S ribosomal protein S2 OS=Homo sapiens GN=RPS2 PE=1 SV=2 - [RS2_HUMAN]	14.33	1	4	4	7	83.0264	10.58	3	3	80.7168	11.95	3	4	293	31.3046	10.2427
P31946	14-3-3 protein beta/alpha OS=Homo sapiens GN=YWHAB PE=1 SV=3 - [1433B_HUMAN]	18.29	2	1	5	9	82.9745	10.57	3	3	103.723	18.29	5	6	246	28.0648	4.83057
P31948	Stress-induced-phosphoprotein 1 OS=Homo sapiens GN=STIP1 PE=1 SV=1 - [STIP1_HUMAN]	10.87	1	5	5	8	82.5609	9.02	4	4	53.63	7.73	4	4	543	62.5994	6.80029
P08865	40S ribosomal protein SA OS=Homo sapiens GN=RPSA PE=1 SV=4 - [RSSA_HUMAN]	10.17	1	2	2	3	82.38	10.17	2	2	27.13	4.41	1	1	295	32.8334	4.86865
O14929	Histone acetyltransferase type B catalytic subunit OS=Homo sapiens GN=HAT1 PE=1 SV=1 - [HAT1_HUMAN]	7.4	1	2	2	4	82.16	7.4	2	2	112.68	7.4	2	2	419	49.4808	5.69385
P16401	Histone H1.5 OS=Homo sapiens GN=HIST1H1B PE=1 SV=3 - [H15_HUMAN]	18.14	1	4	6	10	82.1365	18.14	6	8	45.42	10.18	2	2	226	22.5665	10.9165
P26368	Splicing factor U2AF 65 kDa subunit OS=Homo sapiens GN=U2AF2 PE=1 SV=4 - [U2AF2_HUMAN]	14.53	1	5	6	10	81.3533	8.42	4	5	86.7706	10.74	4	5	475	53.4672	9.08545
P62316	Small nuclear ribonucleoprotein Sm D2 OS=Homo sapiens GN=SNRPD2 PE=1 SV=1 - [SMD2_HUMAN]	44.92	1	6	6	16	81.2526	28.81	4	7	155.351	44.92	6	9	118	13.5182	9.90576
Q8N684	Cleavage and polyadenylation specificity factor subunit 7 OS=Homo sapiens GN=CPSF7 PE=1 SV=1 - [CPSF7_HUMAN]	14.01	1	5	6	13	81.1623	6.58	3	4	146.279	14.01	6	9	471	52.0183	8.00146
Q04917	14-3-3 protein eta OS=Homo sapiens GN=YWHAH PE=1 SV=4 - [1433F_HUMAN]	15.85	2	1	4	7	80.4961	6.91	2	2	94.8832	15.85	4	5	246	28.201	4.84326
Q01085	Nucleolysin TIAR OS=Homo sapiens GN=TIAL1 PE=1 SV=1 - [TIAR_HUMAN]	18.13	1	2	6	11	80.3733	8.27	3	3	136.225	18.13	6	8	375	41.5641	7.73779
P06493	Cyclin-dependent kinase 1 OS=Homo sapiens GN=CDK1 PE=1 SV=3 - [CDK1_HUMAN]	11.45	27	2	3	6	79.4976	6.4	2	3	74.0596	11.45	3	3	297	34.0739	8.39697
P26373	60S ribosomal protein L13 OS=Homo sapiens GN=RPL13 PE=1 SV=4 - [RL13_HUMAN]	13.27	1	3	3	4	79.303	13.27	3	3	55.79	5.21	1	1	211	24.2465	11.6489
P02461	Collagen alpha-1(III) chain OS=Homo sapiens GN=COL3A1 PE=1 SV=4 - [CO3A1_HUMAN]	1.36	1	1	2	8	78.0017	1.36	2	5	29.2309	0.61	1	3	1466	138.479	6.60986
O60343	TBC1 domain family member 4 OS=Homo sapiens GN=TBC1D4 PE=1 SV=2 - [TBCD4_HUMAN]	1.93	1	2	2	4	77.38	1.93	2	4					1298	146.471	7.00537
Q92734	Protein TFG OS=Homo sapiens GN=TFG PE=1 SV=2 - [TFG_HUMAN]	12	4	4	4	6	77.2708	7.5	2	2	97.04	10.5	3	4	400	43.4212	5.09717
P50990	T-complex protein 1 subunit theta OS=Homo sapiens GN=CCT8 PE=1 SV=4 - [TCPQ_HUMAN]	4.93	1	2	2	2	76.798	4.93	2	2					548	59.5825	5.60498
P84098	60S ribosomal protein L19 OS=Homo sapiens GN=RPL19 PE=1 SV=1 - [RL19_HUMAN]	13.27	1	2	2	3	76.6297	13.27	2	2	50.63	8.67	1	1	196	23.4512	11.4731
P11940	Polyadenylate-binding protein 1 OS=Homo sapiens GN=PABPC1 PE=1 SV=2 - [PABP1_HUMAN]	21.38	4	9	13	19	76.1382	7.08	4	4	324.392	20.13	12	15	636	70.6259	9.49561
E5RG02	Putative serine protease 46 OS=Homo sapiens GN=PRSS46 PE=5 SV=1 - [PRS46_HUMAN]	3.45	1	1	1	33	75.5617	3.45	1	18	84.7239	3.45	1	15	174	19.3279	9.1001
P62913	60S ribosomal protein L11 OS=Homo sapiens GN=RPL11 PE=1 SV=2 - [RL11_HUMAN]	12.92	1	2	2	4	75.53	7.87	1	1	66.6033	12.92	2	3	178	20.2396	9.59814
Q16629	Serine/arginine-rich splicing factor 7 OS=Homo sapiens GN=SRSF7 PE=1 SV=1 - [SRSF7_HUMAN]	19.33	1	4	5	13	75.2751	14.71	3	4	260.198	19.33	5	9	238	27.35	11.8247
P12956	X-ray repair cross-complementing protein 6 OS=Homo sapiens GN=XRCC6 PE=1 SV=2 - [XRCC6_HUMAN]	13.96	1	6	6	14	75.1447	13.96	6	8	120.402	11.99	5	6	609	69.7991	6.63916
Q71RC2	La-related protein 4 OS=Homo sapiens GN=LARP4 PE=1 SV=3 - [LARP4_HUMAN]	8.7	1	5	5	7	74.78	1.8	1	1	160.983	8.7	5	6	724	80.5458	6.60986
Q01546	Keratin, type II cytoskeletal 2 oral OS=Homo sapiens GN=KRT76 PE=1 SV=2 - [K22O_HUMAN]	6.43	7	1	5	9	73.9911	5.02	4	4	86.6454	3.92	3	5	638	65.8001	8.11865
Q13107	Ubiquitin carboxyl-terminal hydrolase 4 OS=Homo sapiens GN=USP4 PE=1 SV=3 - [UBP4_HUMAN]	2.49	1	2	2	4	73.2641	2.49	2	3	60.96	1.35	1	1	963	108.496	5.70654
P62917	60S ribosomal protein L8 OS=Homo sapiens GN=RPL8 PE=1 SV=2 - [RL8_HUMAN]	7	1	2	2	4	72.47	7	2	3	34.28	4.28	1	1	257	28.0073	11.0337
Q9UBU9	Nuclear RNA export factor 1 OS=Homo sapiens GN=NXF1 PE=1 SV=1 - [NXF1_HUMAN]	7.75	1	3	4	7	71.81	5.82	3	3	189.642	7.27	3	4	619	70.1387	8.51416
P62942	Peptidyl-prolyl cis-trans isomerase FKBP1A OS=Homo sapiens GN=FKBP1A PE=1 SV=2 - [FKB1A_HUMAN]	25	1	2	2	5	71.44	25	2	2	89.0505	25	2	3	108	11.9431	8.1626
Q15424	Scaffold attachment factor B1 OS=Homo sapiens GN=SAFB PE=1 SV=4 - [SAFB1_HUMAN]	7.21	1	5	6	12	71.4076	4.7	4	5	116.689	6.45	5	7	915	102.58	5.46533
Q04724	Transducin-like enhancer protein 1 OS=Homo sapiens GN=TLE1 PE=1 SV=2 - [TLE1_HUMAN]	2.47	1	1	1	3	70.5067	2.47	1	3					770	83.1484	7.23975
P23528	Cofilin-1 OS=Homo sapiens GN=CFL1 PE=1 SV=3 - [COF1_HUMAN]	42.17	1	2	4	7	70.1167	33.73	3	3	71.43	31.93	3	4	166	18.4907	8.08936
P09234	U1 small nuclear ribonucleoprotein C OS=Homo sapiens GN=SNRPC PE=1 SV=1 - [RU1C_HUMAN]	7.55	1	1	1	2	69.52	7.55	1	1	89.52	7.55	1	1	159	17.3812	9.67139
P39748	Flap endonuclease 1 OS=Homo sapiens GN=FEN1 PE=1 SV=1 - [FEN1_HUMAN]	16.32	1	3	5	7	69.2325	14.47	4	4	53.718	8.16	3	3	380	42.5661	8.6167
P83731	60S ribosomal protein L24 OS=Homo sapiens GN=RPL24 PE=1 SV=1 - [RL24_HUMAN]	8.28	1	1	1	2	68.13	8.28	1	2					157	17.7679	11.2534
Q6STE5	SWI/SNF-related matrix-associated actin-dependent regulator of chromatin subfamily D member 3 OS=Homo sapiens GN=SMARCD3 PE=1 SV=1 - [SMRD3_HUMAN]	6.21	3	2	2	2	67.91	6.21	2	2					483	54.9814	9.34912
P02452	Collagen alpha-1(I) chain OS=Homo sapiens GN=COL1A1 PE=1 SV=5 - [CO1A1_HUMAN]	3.35	1	4	4	11	67.1531	1.43	2	3	162.797	2.53	3	8	1464	138.857	5.79541
P60660	Myosin light polypeptide 6 OS=Homo sapiens GN=MYL6 PE=1 SV=2 - [MYL6_HUMAN]	29.8	2	4	4	6	66.46	23.84	3	3	49.4869	14.57	2	3	151	16.9191	4.65283
O43684	Mitotic checkpoint protein BUB3 OS=Homo sapiens GN=BUB3 PE=1 SV=1 - [BUB3_HUMAN]	22.56	1	6	6	11	66.1817	18.29	5	5	97.77	15.55	4	6	328	37.1312	6.84424
O43175	D-3-phosphoglycerate dehydrogenase OS=Homo sapiens GN=PHGDH PE=1 SV=4 - [SERA_HUMAN]	13.32	1	5	6	6	65.9086	6.57	3	3	90.5205	6.75	3	3	533	56.6144	6.7124
P31689	DnaJ homolog subfamily A member 1 OS=Homo sapiens GN=DNAJA1 PE=1 SV=2 - [DNJA1_HUMAN]	14.86	1	3	3	3	65.76	9.32	2	2	23.29	5.54	1	1	397	44.8395	7.07861
Q13247	Serine/arginine-rich splicing factor 6 OS=Homo sapiens GN=SRSF6 PE=1 SV=2 - [SRSF6_HUMAN]	10.17	2	3	4	5	65.4673	8.14	3	3	41.6665	4.65	2	2	344	39.5634	11.4292
P0CG05	Ig lambda-2 chain C regions OS=Homo sapiens GN=IGLC2 PE=1 SV=1 - [LAC2_HUMAN]	41.51	5	2	3	6	65.4209	27.36	2	2	123.288	23.58	2	4	106	11.2865	7.23975
P61313	60S ribosomal protein L15 OS=Homo sapiens GN=RPL15 PE=1 SV=2 - [RL15_HUMAN]	28.43	1	6	6	9	65.3467	25	5	5	67.7063	18.14	4	4	204	24.1311	11.6196
P01857	Ig gamma-1 chain C region OS=Homo sapiens GN=IGHG1 PE=1 SV=1 - [IGHG1_HUMAN]	5.76	4	2	2	8	65.1245	5.76	2	4	67.2523	5.76	2	4	330	36.0832	8.19189
P24666	Low molecular weight phosphotyrosine protein phosphatase OS=Homo sapiens GN=ACP1 PE=1 SV=3 - [PPAC_HUMAN]	30.38	1	4	4	6	64.5602	24.05	3	5	31.06	6.33	1	1	158	18.0308	6.7417
Q13765	Nascent polypeptide-associated complex subunit alpha OS=Homo sapiens GN=NACA PE=1 SV=1 - [NACA_HUMAN]	13.49	2	2	2	4	64.42	13.49	2	2	78.97	6.98	1	2	215	23.3697	4.56396
P62318	Small nuclear ribonucleoprotein Sm D3 OS=Homo sapiens GN=SNRPD3 PE=1 SV=1 - [SMD3_HUMAN]	15.08	1	2	2	3	63.9	7.94	1	1	60.38	15.08	2	2	126	13.9073	10.3159
P40227	T-complex protein 1 subunit zeta OS=Homo sapiens GN=CCT6A PE=1 SV=3 - [TCPZ_HUMAN]	6.4	1	2	2	3	63.7233	6.4	2	3					531	57.9876	6.68311
Q02543	60S ribosomal protein L18a OS=Homo sapiens GN=RPL18A PE=1 SV=2 - [RL18A_HUMAN]	8.52	1	2	2	2	63.6042	8.52	2	2					176	20.7489	10.7114
P67936	Tropomyosin alpha-4 chain OS=Homo sapiens GN=TPM4 PE=1 SV=3 - [TPM4_HUMAN]	9.27	1	2	3	3	63.5749	8.87	2	2	26.01	6.05	1	1	248	28.5045	4.69092
O43719	HIV Tat-specific factor 1 OS=Homo sapiens GN=HTATSF1 PE=1 SV=1 - [HTSF1_HUMAN]	4.5	1	3	3	6	63.38	3.71	2	3	52.2958	4.5	3	3	755	85.8006	4.39893
P35268	60S ribosomal protein L22 OS=Homo sapiens GN=RPL22 PE=1 SV=2 - [RL22_HUMAN]	18.75	1	2	2	3	62.85	18.75	2	2	26.47	10.16	1	1	128	14.7778	9.18799
P62829	60S ribosomal protein L23 OS=Homo sapiens GN=RPL23 PE=1 SV=1 - [RL23_HUMAN]	23.57	1	3	3	6	62.53	17.86	2	4	28.7427	12.86	2	2	140	14.8561	10.5063
P23284	Peptidyl-prolyl cis-trans isomerase B OS=Homo sapiens GN=PPIB PE=1 SV=2 - [PPIB_HUMAN]	18.06	3	3	4	9	61.91	8.8	2	3	113.102	18.06	4	6	216	23.7275	9.40771
P30044	Peroxiredoxin-5, mitochondrial OS=Homo sapiens GN=PRDX5 PE=1 SV=4 - [PRDX5_HUMAN]	14.49	1	2	2	3	60.9488	14.49	2	3					214	22.0725	8.70459
P62306	Small nuclear ribonucleoprotein F OS=Homo sapiens GN=SNRPF PE=1 SV=1 - [RUXF_HUMAN]	15.12	1	1	1	4	60.59	15.12	1	2	75.59	15.12	1	2	86	9.71878	4.66553
P61254	60S ribosomal protein L26 OS=Homo sapiens GN=RPL26 PE=1 SV=1 - [RL26_HUMAN]	16.55	3	3	3	5	60.4114	10.34	2	2	36.1833	10.34	2	3	145	17.2475	10.5503
O75525	KH domain-containing, RNA-binding, signal transduction-associated protein 3 OS=Homo sapiens GN=KHDRBS3 PE=1 SV=1 - [KHDR3_HUMAN]	12.72	2	4	6	12	59.4014	10.4	5	7	62.4178	8.09	4	5	346	38.7756	7.60596
Q16576	Histone-binding protein RBBP7 OS=Homo sapiens GN=RBBP7 PE=1 SV=1 - [RBBP7_HUMAN]	7.29	2	3	3	5	59.0491	7.29	3	3	33.2255	4.94	2	2	425	47.7902	5.04639
P23526	Adenosylhomocysteinase OS=Homo sapiens GN=AHCY PE=1 SV=4 - [SAHH_HUMAN]	8.33	1	3	3	5	58.8545	8.33	3	3	55.3339	5.56	2	2	432	47.6852	6.34131
Q15393	Splicing factor 3B subunit 3 OS=Homo sapiens GN=SF3B3 PE=1 SV=4 - [SF3B3_HUMAN]	2.38	1	2	2	2	58.81	2.38	2	2					1217	135.492	5.26221
P55884	Eukaryotic translation initiation factor 3 subunit B OS=Homo sapiens GN=EIF3B PE=1 SV=3 - [EIF3B_HUMAN]	1.72	1	1	1	1	58.61	1.72	1	1					814	92.4238	4.99561
P61247	40S ribosomal protein S3a OS=Homo sapiens GN=RPS3A PE=1 SV=2 - [RS3A_HUMAN]	9.47	1	2	2	3	58.14	6.44	1	1	37.38	3.03	1	2	264	29.9257	9.72998
P42704	Leucine-rich PPR motif-containing protein, mitochondrial OS=Homo sapiens GN=LRPPRC PE=1 SV=3 - [LPPRC_HUMAN]	2.65	1	3	3	3	57.87	2.65	3	3					1394	157.805	6.12549
Q5JSZ5	Protein PRRC2B OS=Homo sapiens GN=PRRC2B PE=1 SV=2 - [PRC2B_HUMAN]	1.53	1	2	2	5	57.49	1.53	2	2	118.947	0.85	1	3	2229	242.817	8.33838
P31483	Nucleolysin TIA-1 isoform p40 OS=Homo sapiens GN=TIA1 PE=1 SV=3 - [TIA1_HUMAN]	17.88	1	3	7	12	57.1967	8.29	3	3	172.022	14.77	6	9	386	42.9356	7.73779
A8MWD9	Small nuclear ribonucleoprotein G-like protein OS=Homo sapiens PE=2 SV=2 - [RUXGL_HUMAN]	15.79	2	1	1	3	57.03	15.79	1	1	84.2467	15.79	1	2	76	8.53845	8.83643
Q9Y281	Cofilin-2 OS=Homo sapiens GN=CFL2 PE=1 SV=1 - [COF2_HUMAN]	28.92	1	1	3	4	56.9433	28.92	3	3	41.18	6.63	1	1	166	18.7249	7.88428
P61204	ADP-ribosylation factor 3 OS=Homo sapiens GN=ARF3 PE=1 SV=2 - [ARF3_HUMAN]	8.29	2	1	1	2	56.88	8.29	1	2					181	20.5877	7.43018
Q52LJ0	Protein FAM98B OS=Homo sapiens GN=FAM98B PE=1 SV=1 - [FA98B_HUMAN]	3.94	1	1	1	3	56.81	3.94	1	2	48.43	3.94	1	1	330	37.167	6.29053
P46781	40S ribosomal protein S9 OS=Homo sapiens GN=RPS9 PE=1 SV=3 - [RS9_HUMAN]	20.1	1	4	4	8	56.7933	15.46	3	3	86.5635	20.1	4	5	194	22.5776	10.6528
P27694	Replication protein A 70 kDa DNA-binding subunit OS=Homo sapiens GN=RPA1 PE=1 SV=2 - [RFA1_HUMAN]	10.55	1	4	4	5	56.2883	5.03	2	2	59.361	8.6	3	3	616	68.0953	7.21045
P27635	60S ribosomal protein L10 OS=Homo sapiens GN=RPL10 PE=1 SV=4 - [RL10_HUMAN]	6.07	1	1	1	2	55.94	6.07	1	1	49.34	6.07	1	1	214	24.5879	10.0815
P62899	60S ribosomal protein L31 OS=Homo sapiens GN=RPL31 PE=1 SV=1 - [RL31_HUMAN]	18.4	1	2	2	5	55.6365	18.4	2	2	76.7353	18.4	2	3	125	14.4539	10.5356
Q13283	Ras GTPase-activating protein-binding protein 1 OS=Homo sapiens GN=G3BP1 PE=1 SV=1 - [G3BP1_HUMAN]	2.36	1	1	1	2	55.42	2.36	1	1	26.8	2.36	1	1	466	52.1321	5.51611
Q13595	Transformer-2 protein homolog alpha OS=Homo sapiens GN=TRA2A PE=1 SV=1 - [TRA2A_HUMAN]	8.16	1	2	2	6	55.27	8.16	2	2	69.7238	8.16	2	4	282	32.6691	11.2681
P61163	Alpha-centractin OS=Homo sapiens GN=ACTR1A PE=1 SV=1 - [ACTZ_HUMAN]	4.26	3	1	2	4	55.16	4.26	2	2	44.971	1.6	1	2	376	42.5869	6.63916
Q9H0D6	5'-3' exoribonuclease 2 OS=Homo sapiens GN=XRN2 PE=1 SV=1 - [XRN2_HUMAN]	5.89	1	5	5	8	54.7928	3.47	3	4	76.338	4.95	4	4	950	108.513	7.47412
Q13310	Polyadenylate-binding protein 4 OS=Homo sapiens GN=PABPC4 PE=1 SV=1 - [PABP4_HUMAN]	9.01	1	1	5	9	53.5265	4.19	2	2	155.735	9.01	5	7	644	70.7381	9.26123
Q99459	Cell division cycle 5-like protein OS=Homo sapiens GN=CDC5L PE=1 SV=2 - [CDC5L_HUMAN]	7.61	1	5	5	6	53.1591	4.24	2	2	47.37	5.36	4	4	802	92.1937	8.17725
P42166	Lamina-associated polypeptide 2, isoform alpha OS=Homo sapiens GN=TMPO PE=1 SV=2 - [LAP2A_HUMAN]	3.46	2	2	2	3	52.95	3.46	2	2	56.09	1.59	1	1	694	75.4456	7.66455
P62304	Small nuclear ribonucleoprotein E OS=Homo sapiens GN=SNRPE PE=1 SV=1 - [RUXE_HUMAN]	25	1	2	2	2	52.46	13.04	1	1	26.63	11.96	1	1	92	10.7966	9.43701
P30043	Flavin reductase (NADPH) OS=Homo sapiens GN=BLVRB PE=1 SV=3 - [BLVRB_HUMAN]	14.08	1	2	2	2	52.1	7.28	1	1	28.42	6.8	1	1	206	22.1054	7.6499
P11388	DNA topoisomerase 2-alpha OS=Homo sapiens GN=TOP2A PE=1 SV=3 - [TOP2A_HUMAN]	3.27	2	4	4	4	51.64	1.63	2	2	26.24	1.63	2	2	1531	174.276	8.71924
P81605	Dermcidin OS=Homo sapiens GN=DCD PE=1 SV=2 - [DCD_HUMAN]	22.73	1	3	3	6	51.326	20	2	2	122.677	22.73	3	4	110	11.2768	6.53662
Q9H0L4	Cleavage stimulation factor subunit 2 tau variant OS=Homo sapiens GN=CSTF2T PE=1 SV=1 - [CSTFT_HUMAN]	1.62	1	1	1	1	51.15	1.62	1	1					616	64.3955	7.25439
P26038	Moesin OS=Homo sapiens GN=MSN PE=1 SV=3 - [MOES_HUMAN]	7.28	2	1	5	11	51.1416	5.89	4	4	157.709	7.28	5	7	577	67.7778	6.40479
P46776	60S ribosomal protein L27a OS=Homo sapiens GN=RPL27A PE=1 SV=2 - [RL27A_HUMAN]	14.19	1	2	2	3	51.13	14.19	2	2	54.55	6.76	1	1	148	16.551	11.0044
P62249	40S ribosomal protein S16 OS=Homo sapiens GN=RPS16 PE=1 SV=2 - [RS16_HUMAN]	30.14	1	5	5	6	50.9849	10.96	2	2	82.1094	24.66	4	4	146	16.435	10.2134
Q92900	Regulator of nonsense transcripts 1 OS=Homo sapiens GN=UPF1 PE=1 SV=2 - [RENT1_HUMAN]	5.49	1	5	5	7	50.89	1.51	1	1	91.1878	5.49	5	6	1129	124.267	6.60986
P61353	60S ribosomal protein L27 OS=Homo sapiens GN=RPL27 PE=1 SV=2 - [RL27_HUMAN]	27.94	1	3	3	6	50.7903	27.94	3	3	52.71	12.5	2	3	136	15.7877	10.5649
P23193	Transcription elongation factor A protein 1 OS=Homo sapiens GN=TCEA1 PE=1 SV=2 - [TCEA1_HUMAN]	11.63	1	3	3	4	50.35	7.31	2	2	48.08	8.31	2	2	301	33.948	8.38232
P07237	Protein disulfide-isomerase OS=Homo sapiens GN=P4HB PE=1 SV=3 - [PDIA1_HUMAN]	5.51	1	2	2	3	50.2621	5.51	2	3					508	57.0807	4.86865
P18085	ADP-ribosylation factor 4 OS=Homo sapiens GN=ARF4 PE=1 SV=3 - [ARF4_HUMAN]	15	1	3	3	5	50.233	9.44	2	2	50.4314	11.11	2	3	180	20.4977	7.13721
Q15785	Mitochondrial import receptor subunit TOM34 OS=Homo sapiens GN=TOMM34 PE=1 SV=2 - [TOM34_HUMAN]	6.47	1	1	1	2	50.21	6.47	1	2					309	34.5378	8.98291
O75323	Protein NipSnap homolog 2 OS=Homo sapiens GN=GBAS PE=1 SV=1 - [NIPS2_HUMAN]	2.45	1	1	1	2	49.6253	2.45	1	2					286	33.7212	9.36377
P01604	Ig kappa chain V-I region Kue OS=Homo sapiens PE=1 SV=1 - [KV112_HUMAN]	14.81	7	2	2	8	49.6026	14.81	2	6	26.6635	14.81	2	2	108	12.119	8.80713
P98175	RNA-binding protein 10 OS=Homo sapiens GN=RBM10 PE=1 SV=3 - [RBM10_HUMAN]	2.9	1	2	2	4	49.33	2.9	2	2	72.71	2.9	2	2	930	103.469	5.97314
O43395	U4/U6 small nuclear ribonucleoprotein Prp3 OS=Homo sapiens GN=PRPF3 PE=1 SV=2 - [PRPF3_HUMAN]	5.56	1	3	4	4	49.0733	4.54	3	3	21.06	1.02	1	1	683	77.4809	9.49561
O14656	Torsin-1A OS=Homo sapiens GN=TOR1A PE=1 SV=1 - [TOR1A_HUMAN]	10.24	1	3	3	7	48.97	3.01	1	1	164.348	10.24	3	6	332	37.7845	6.99072
P0CG48	Polyubiquitin-C OS=Homo sapiens GN=UBC PE=1 SV=3 - [UBC_HUMAN]	40.73	4	3	3	5	48.5913	40.73	3	3	30.458	28.91	2	2	685	76.9915	7.66455
P04196	Histidine-rich glycoprotein OS=Homo sapiens GN=HRG PE=1 SV=1 - [HRG_HUMAN]	3.05	1	2	2	4	48.57	1.71	1	1	53.85	3.05	2	3	525	59.5409	7.50342
P08758	Annexin A5 OS=Homo sapiens GN=ANXA5 PE=1 SV=2 - [ANXA5_HUMAN]	5	1	1	1	1	48.45	5	1	1					320	35.9144	5.04639
Q9HCD5	Nuclear receptor coactivator 5 OS=Homo sapiens GN=NCOA5 PE=1 SV=2 - [NCOA5_HUMAN]	7.08	1	4	4	7	47.9433	5.35	3	3	107.577	5.7	3	4	579	65.4965	9.59814
Q06830	Peroxiredoxin-1 OS=Homo sapiens GN=PRDX1 PE=1 SV=1 - [PRDX1_HUMAN]	23.62	2	4	5	8	47.9188	7.54	2	2	107.751	20.1	4	6	199	22.0963	8.1333
Q9P2K5	Myelin expression factor 2 OS=Homo sapiens GN=MYEF2 PE=1 SV=3 - [MYEF2_HUMAN]	7.83	1	5	5	8	47.81	3.83	2	2	108.211	5.83	4	6	600	64.0805	8.74854
P60174	Triosephosphate isomerase OS=Homo sapiens GN=TPI1 PE=1 SV=3 - [TPIS_HUMAN]	9.44	1	2	2	4	47.54	4.2	1	1	67.8433	9.44	2	3	286	30.7717	5.92236
Q96C19	EF-hand domain-containing protein D2 OS=Homo sapiens GN=EFHD2 PE=1 SV=1 - [EFHD2_HUMAN]	5	1	1	1	1	47.07	5	1	1					240	26.6805	5.19873
P13010	X-ray repair cross-complementing protein 5 OS=Homo sapiens GN=XRCC5 PE=1 SV=3 - [XRCC5_HUMAN]	5.6	1	4	4	6	47.0143	4.23	3	3	53.0643	3.96	3	3	732	82.6523	5.80811
P55265	Double-stranded RNA-specific adenosine deaminase OS=Homo sapiens GN=ADAR PE=1 SV=4 - [DSRAD_HUMAN]	7.75	1	7	7	9	46.88	2.28	2	2	140.733	6.93	6	7	1226	135.981	8.646
O95232	Luc7-like protein 3 OS=Homo sapiens GN=LUC7L3 PE=1 SV=2 - [LC7L3_HUMAN]	2.55	1	1	1	1	46.58	2.55	1	1					432	51.4351	9.78857
P11413	Glucose-6-phosphate 1-dehydrogenase OS=Homo sapiens GN=G6PD PE=1 SV=4 - [G6PD_HUMAN]	3.11	1	1	1	2	46.49	3.11	1	1	54.73	3.11	1	1	515	59.219	6.84424
P49207	60S ribosomal protein L34 OS=Homo sapiens GN=RPL34 PE=1 SV=3 - [RL34_HUMAN]	14.53	1	2	2	2	46.19	14.53	2	2					117	13.2845	11.4731
Q9Y490	Talin-1 OS=Homo sapiens GN=TLN1 PE=1 SV=3 - [TLN1_HUMAN]	1.22	1	2	2	2	46.0675	1.22	2	2					2541	269.599	6.07471
P78347	General transcription factor II-I OS=Homo sapiens GN=GTF2I PE=1 SV=2 - [GTF2I_HUMAN]	3.71	1	3	3	3	45.8913	3.71	3	3					998	112.346	6.39209
P62333	26S protease regulatory subunit 10B OS=Homo sapiens GN=PSMC6 PE=1 SV=1 - [PRS10_HUMAN]	4.11	1	1	2	2	45.244	4.11	2	2					389	44.1451	7.48877
Q96QR8	Transcriptional activator protein Pur-beta OS=Homo sapiens GN=PURB PE=1 SV=3 - [PURB_HUMAN]	6.09	2	2	2	3	45.0691	6.09	2	2	22.35	1.92	1	1	312	33.2205	5.42725
Q07065	Cytoskeleton-associated protein 4 OS=Homo sapiens GN=CKAP4 PE=1 SV=2 - [CKAP4_HUMAN]	13.79	1	6	6	7	44.93	8.97	4	4	69.0767	7.97	3	3	602	65.9827	5.92236
P09429	High mobility group protein B1 OS=Homo sapiens GN=HMGB1 PE=1 SV=3 - [HMGB1_HUMAN]	13.02	2	2	2	4	44.93	6.98	1	1	52.0495	13.02	2	3	215	24.8782	5.74463
P28482	Mitogen-activated protein kinase 1 OS=Homo sapiens GN=MAPK1 PE=1 SV=3 - [MK01_HUMAN]	11.67	2	4	4	6	44.7911	8.61	3	3	56.0867	5.56	2	3	360	41.3632	6.97607
Q99873	Protein arginine N-methyltransferase 1 OS=Homo sapiens GN=PRMT1 PE=1 SV=2 - [ANM1_HUMAN]	10.53	1	3	3	5	44.45	6.37	2	2	46.3367	7.48	2	3	361	41.4885	5.42725
Q14974	Importin subunit beta-1 OS=Homo sapiens GN=KPNB1 PE=1 SV=2 - [IMB1_HUMAN]	0.91	1	1	1	1	44.1	0.91	1	1					876	97.108	4.77979
Q8IY67	Ribonucleoprotein PTB-binding 1 OS=Homo sapiens GN=RAVER1 PE=1 SV=1 - [RAVR1_HUMAN]	2.15	1	1	1	1	43.82	2.15	1	1					606	63.8372	8.48486
Q86UE4	Protein LYRIC OS=Homo sapiens GN=MTDH PE=1 SV=2 - [LYRIC_HUMAN]	1.89	1	1	1	1	43.4	1.89	1	1					582	63.7988	9.31982
P35659	Protein DEK OS=Homo sapiens GN=DEK PE=1 SV=1 - [DEK_HUMAN]	5.6	1	2	2	2	43.36	5.6	2	2					375	42.6479	8.55811
Q9UJU6	Drebrin-like protein OS=Homo sapiens GN=DBNL PE=1 SV=1 - [DBNL_HUMAN]	11.63	1	3	3	4	43.3089	6.98	2	2	47.65	8.37	2	2	430	48.1776	5.04639
P51532	Transcription activator BRG1 OS=Homo sapiens GN=SMARCA4 PE=1 SV=2 - [SMCA4_HUMAN]	2.31	1	3	3	4	43.1465	2.31	3	3	23.76	0.43	1	1	1647	184.53	7.88428
Q92879	CUGBP Elav-like family member 1 OS=Homo sapiens GN=CELF1 PE=1 SV=2 - [CELF1_HUMAN]	11.32	1	5	5	7	42.7876	4.94	2	2	89.6237	9.67	4	5	486	52.0299	8.45557
Q1KMD3	Heterogeneous nuclear ribonucleoprotein U-like protein 2 OS=Homo sapiens GN=HNRNPUL2 PE=1 SV=1 - [HNRL2_HUMAN]	4.95	1	3	3	5	42.71	3.08	2	2	87.2367	3.21	2	3	747	85.0522	4.90674
Q86VP6	Cullin-associated NEDD8-dissociated protein 1 OS=Homo sapiens GN=CAND1 PE=1 SV=2 - [CAND1_HUMAN]	3.17	1	3	3	3	42.66	3.17	3	3					1230	136.289	5.78271
P06576	ATP synthase subunit beta, mitochondrial OS=Homo sapiens GN=ATP5B PE=1 SV=3 - [ATPB_HUMAN]	2.08	1	1	1	1	42.62	2.08	1	1					529	56.5246	5.40186
P63244	Guanine nucleotide-binding protein subunit beta-2-like 1 OS=Homo sapiens GN=GNB2L1 PE=1 SV=3 - [GBLP_HUMAN]	12.3	1	3	3	4	42.09	7.26	2	2	46.59	8.83	2	2	317	35.0546	7.69385
O75131	Copine-3 OS=Homo sapiens GN=CPNE3 PE=1 SV=1 - [CPNE3_HUMAN]	3.35	8	2	2	2	42.0729	3.35	2	2					537	60.0921	5.84619
Q12874	Splicing factor 3A subunit 3 OS=Homo sapiens GN=SF3A3 PE=1 SV=1 - [SF3A3_HUMAN]	1.8	1	1	1	1	42.03	1.8	1	1					501	58.8123	5.37646
P09012	U1 small nuclear ribonucleoprotein A OS=Homo sapiens GN=SNRPA PE=1 SV=3 - [SNRPA_HUMAN]	15.25	2	3	4	6	42.0132	6.38	2	2	60.1035	11.7	3	4	282	31.2592	9.83252
P08183	Multidrug resistance protein 1 OS=Homo sapiens GN=ABCB1 PE=1 SV=3 - [MDR1_HUMAN]	0.7	1	1	2	6	41.8258	0.7	2	4	25.4065	0.7	2	2	1280	141.389	8.99756
P27816	Microtubule-associated protein 4 OS=Homo sapiens GN=MAP4 PE=1 SV=3 - [MAP4_HUMAN]	1.3	1	1	1	2	41.71	1.3	1	2					1152	120.93	5.42725
Q15436	Protein transport protein Sec23A OS=Homo sapiens GN=SEC23A PE=1 SV=2 - [SC23A_HUMAN]	1.83	2	1	1	1	41.65	1.83	1	1					765	86.1053	7.07861
C9JRZ8	Aldo-keto reductase family 1 member B15 OS=Homo sapiens GN=AKR1B15 PE=1 SV=2 - [AK1BF_HUMAN]	5.06	2	1	2	3	41.49	2.53	1	1	36.52	5.06	2	2	316	36.5138	6.69775
Q9UN19	Dual adapter for phosphotyrosine and 3-phosphotyrosine and 3-phosphoinositide OS=Homo sapiens GN=DAPP1 PE=1 SV=1 - [DAPP1_HUMAN]	4.29	1	1	1	4	41.1951	4.29	1	4					280	32.1732	7.79639
Q96KR1	Zinc finger RNA-binding protein OS=Homo sapiens GN=ZFR PE=1 SV=2 - [ZFR_HUMAN]	3.17	1	2	2	4	41.04	1.58	1	1	132.47	3.17	2	3	1074	116.939	9.0415
P61513	60S ribosomal protein L37a OS=Homo sapiens GN=RPL37A PE=1 SV=2 - [RL37A_HUMAN]	26.09	1	1	2	4	41.03	19.57	1	1	47.2564	26.09	2	3	92	10.2685	10.4331
Q9Y314	Nitric oxide synthase-interacting protein OS=Homo sapiens GN=NOSIP PE=1 SV=1 - [NOSIP_HUMAN]	6.98	1	1	1	2	40.88	6.98	1	1	29.18	6.98	1	1	301	33.151	8.82178
P62854	40S ribosomal protein S26 OS=Homo sapiens GN=RPS26 PE=1 SV=3 - [RS26_HUMAN]	13.91	2	1	2	3	40.731	13.91	2	2	29.5	6.09	1	1	115	13.0071	11.0044
Q5SSJ5	Heterochromatin protein 1-binding protein 3 OS=Homo sapiens GN=HP1BP3 PE=1 SV=1 - [HP1B3_HUMAN]	3.98	1	2	2	2	40.73	3.98	2	2					553	61.1693	9.67139
P33992	DNA replication licensing factor MCM5 OS=Homo sapiens GN=MCM5 PE=1 SV=5 - [MCM5_HUMAN]	3.54	1	2	2	3	40.5	3.54	2	2	29.4	1.77	1	1	734	82.2332	8.36768
Q9Y2X3	Nucleolar protein 58 OS=Homo sapiens GN=NOP58 PE=1 SV=1 - [NOP58_HUMAN]	3.21	1	1	1	2	40.3138	3.21	1	2					529	59.5405	8.92432
Q12926	ELAV-like protein 2 OS=Homo sapiens GN=ELAVL2 PE=1 SV=2 - [ELAV2_HUMAN]	6.13	2	2	2	4	40.3	3.06	1	2	62.4559	6.13	2	2	359	39.4791	9.12939
Q9ULU4	Protein kinase C-binding protein 1 OS=Homo sapiens GN=ZMYND8 PE=1 SV=2 - [PKCB1_HUMAN]	1.77	1	1	1	1	40.13	1.77	1	1					1186	131.61	7.1958
Q02878	60S ribosomal protein L6 OS=Homo sapiens GN=RPL6 PE=1 SV=3 - [RL6_HUMAN]	5.9	1	2	2	4	39.8771	5.9	2	2	23.4	3.13	1	2	288	32.7076	10.5796
P18615	Negative elongation factor E OS=Homo sapiens GN=NELFE PE=1 SV=3 - [NELFE_HUMAN]	10	1	2	2	2	39.82	10	2	2					380	43.2137	9.33447
P48643	T-complex protein 1 subunit epsilon OS=Homo sapiens GN=CCT5 PE=1 SV=1 - [TCPE_HUMAN]	1.85	1	1	1	2	39.8081	1.85	1	2					541	59.6328	5.65576
P05388	60S acidic ribosomal protein P0 OS=Homo sapiens GN=RPLP0 PE=1 SV=1 - [RLA0_HUMAN]	3.15	2	1	1	1	38.55	3.15	1	1					317	34.2518	5.97314
Q9BXP5	Serrate RNA effector molecule homolog OS=Homo sapiens GN=SRRT PE=1 SV=1 - [SRRT_HUMAN]	2.28	1	2	2	3	38.3598	2.28	2	2	37.29	1.14	1	1	876	100.604	5.96045
P10768	S-formylglutathione hydrolase OS=Homo sapiens GN=ESD PE=1 SV=2 - [ESTD_HUMAN]	12.06	1	2	2	3	38.32	4.26	1	2	44.43	7.8	1	1	282	31.4425	7.02002
P62847	40S ribosomal protein S24 OS=Homo sapiens GN=RPS24 PE=1 SV=1 - [RS24_HUMAN]	11.28	1	1	1	3	38.21	11.28	1	1	55	11.28	1	2	133	15.4134	10.7847
P16949	Stathmin OS=Homo sapiens GN=STMN1 PE=1 SV=3 - [STMN1_HUMAN]	32.89	2	4	5	6	38.0879	18.79	3	3	52.69	20.81	3	3	149	17.292	5.97314
Q92785	Zinc finger protein ubi-d4 OS=Homo sapiens GN=DPF2 PE=1 SV=2 - [REQU_HUMAN]	4.09	1	1	1	1	38	4.09	1	1					391	44.1272	6.32861
Q08J23	tRNA (cytosine(34)-C(5))-methyltransferase OS=Homo sapiens GN=NSUN2 PE=1 SV=2 - [NSUN2_HUMAN]	3.78	1	2	2	3	37.71	3.78	2	2	28.06	1.43	1	1	767	86.4158	6.771
P14868	Aspartate--tRNA ligase, cytoplasmic OS=Homo sapiens GN=DARS PE=1 SV=2 - [SYDC_HUMAN]	5.59	1	2	2	2	37.6989	5.59	2	2					501	57.1	6.55127
P29692	Elongation factor 1-delta OS=Homo sapiens GN=EEF1D PE=1 SV=5 - [EF1D_HUMAN]	4.27	1	1	1	1	37.62	4.27	1	1					281	31.1028	5.0083
Q9Y2W1	Thyroid hormone receptor-associated protein 3 OS=Homo sapiens GN=THRAP3 PE=1 SV=2 - [TR150_HUMAN]	7.02	1	5	6	8	37.5941	3.35	3	3	76.1624	7.02	5	5	955	108.601	10.1548
P61006	Ras-related protein Rab-8A OS=Homo sapiens GN=RAB8A PE=1 SV=1 - [RAB8A_HUMAN]	15.94	24	3	3	4	37.49	5.31	1	1	56.7532	15.94	3	3	207	23.6532	9.0708
Q13285	Steroidogenic factor 1 OS=Homo sapiens GN=NR5A1 PE=1 SV=2 - [STF1_HUMAN]	2.39	1	1	1	1	37.16	2.39	1	1					461	51.6023	7.6792
P62701	40S ribosomal protein S4, X isoform OS=Homo sapiens GN=RPS4X PE=1 SV=2 - [RS4X_HUMAN]	9.51	3	2	3	5	37.1585	6.08	2	3	38.4548	6.84	2	2	263	29.5791	10.1548
O75533	Splicing factor 3B subunit 1 OS=Homo sapiens GN=SF3B1 PE=1 SV=3 - [SF3B1_HUMAN]	3.3	1	2	2	3	37.0606	1.07	1	2	34.46	2.22	1	1	1304	145.738	7.09326
P29401	Transketolase OS=Homo sapiens GN=TKT PE=1 SV=3 - [TKT_HUMAN]	7.7	1	4	4	5	36.8731	2.73	2	2	74.54	4.98	2	3	623	67.8347	7.66455
P53999	Activated RNA polymerase II transcriptional coactivator p15 OS=Homo sapiens GN=SUB1 PE=1 SV=3 - [TCP4_HUMAN]	30.71	1	4	4	8	36.7408	11.81	2	2	139.195	30.71	4	6	127	14.3864	9.59814
P51858	Hepatoma-derived growth factor OS=Homo sapiens GN=HDGF PE=1 SV=1 - [HDGF_HUMAN]	7.5	3	1	2	3	36.73	7.5	2	2	31.52	4.17	1	1	240	26.7719	4.729
Q12797	Aspartyl/asparaginyl beta-hydroxylase OS=Homo sapiens GN=ASPH PE=1 SV=3 - [ASPH_HUMAN]	3.3	1	1	1	1	36.71	3.3	1	1					758	85.8095	5.0083
P62081	40S ribosomal protein S7 OS=Homo sapiens GN=RPS7 PE=1 SV=1 - [RS7_HUMAN]	17.01	1	2	2	2	36.52	5.67	1	1	22.78	11.34	1	1	194	22.1133	10.0962
P08123	Collagen alpha-2(I) chain OS=Homo sapiens GN=COL1A2 PE=1 SV=7 - [CO1A2_HUMAN]	1.32	1	2	2	4	36.4894	1.32	2	2	37.13	0.66	1	2	1366	129.235	8.95361
P62826	GTP-binding nuclear protein Ran OS=Homo sapiens GN=RAN PE=1 SV=3 - [RAN_HUMAN]	18.52	1	4	4	6	36.4388	8.8	2	2	70.8663	18.52	4	4	216	24.4076	7.48877
Q5D862	Filaggrin-2 OS=Homo sapiens GN=FLG2 PE=1 SV=1 - [FILA2_HUMAN]	0.5	1	1	1	1	36.35	0.5	1	1					2391	247.928	8.30908
Q15532	Protein SSXT OS=Homo sapiens GN=SS18 PE=1 SV=3 - [SSXT_HUMAN]	6.22	1	2	3	5	36.3365	2.87	1	2	28.3193	6.22	3	3	418	45.8992	6.45557
P30050	60S ribosomal protein L12 OS=Homo sapiens GN=RPL12 PE=1 SV=1 - [RL12_HUMAN]	24.24	1	2	3	5	36.138	15.15	2	2	33.6685	24.24	3	3	165	17.8075	9.42236
P78371	T-complex protein 1 subunit beta OS=Homo sapiens GN=CCT2 PE=1 SV=4 - [TCPB_HUMAN]	6.36	1	2	2	2	36.05	6.36	2	2					535	57.4521	6.45557
Q8IX01	SURP and G-patch domain-containing protein 2 OS=Homo sapiens GN=SUGP2 PE=1 SV=2 - [SUGP2_HUMAN]	3.14	1	2	3	4	36.04	1.11	1	1	57.1833	2.03	2	3	1082	120.132	7.28369
P82979	SAP domain-containing ribonucleoprotein OS=Homo sapiens GN=SARNP PE=1 SV=3 - [SARNP_HUMAN]	9.05	1	1	1	2	36.03	9.05	1	1	46.28	9.05	1	1	210	23.6564	6.41748
Q9NUL3	Double-stranded RNA-binding protein Staufen homolog 2 OS=Homo sapiens GN=STAU2 PE=1 SV=1 - [STAU2_HUMAN]	1.4	2	1	1	2	36.0029	1.4	1	2					570	62.6013	9.61279
Q92733	Proline-rich protein PRCC OS=Homo sapiens GN=PRCC PE=1 SV=1 - [PRCC_HUMAN]	6.92	1	2	2	3	35.9535	6.92	2	2	26.61	4.28	1	1	491	52.3855	5.09717
P26196	Probable ATP-dependent RNA helicase DDX6 OS=Homo sapiens GN=DDX6 PE=1 SV=2 - [DDX6_HUMAN]	7.25	1	2	2	4	35.78	7.25	2	2	42.7	7.25	2	2	483	54.3823	8.66064
Q9Y6V7	Probable ATP-dependent RNA helicase DDX49 OS=Homo sapiens GN=DDX49 PE=1 SV=1 - [DDX49_HUMAN]	2.07	1	1	1	2	35.75	2.07	1	1	32.06	2.07	1	1	483	54.192	9.05615
Q5VTR2	E3 ubiquitin-protein ligase BRE1A OS=Homo sapiens GN=RNF20 PE=1 SV=2 - [BRE1A_HUMAN]	1.44	1	1	1	2	35.6642	1.44	1	2					975	113.592	5.93506
Q14151	Scaffold attachment factor B2 OS=Homo sapiens GN=SAFB2 PE=1 SV=1 - [SAFB2_HUMAN]	3.46	1	2	3	3	35.66	0.94	1	1	54.0975	2.52	2	2	953	107.408	6.16357
P62266	40S ribosomal protein S23 OS=Homo sapiens GN=RPS23 PE=1 SV=3 - [RS23_HUMAN]	23.78	1	3	3	5	35.6506	23.78	3	3	117.1	7.69	1	2	143	15.7977	10.4917
Q8WZ74	Cortactin-binding protein 2 OS=Homo sapiens GN=CTTNBP2 PE=1 SV=1 - [CTTB2_HUMAN]	1.5	1	2	2	3	35.49	1.5	2	2	28.95	0.66	1	1	1663	180.938	7.92822
Q7Z2W4	Zinc finger CCCH-type antiviral protein 1 OS=Homo sapiens GN=ZC3HAV1 PE=1 SV=3 - [ZCCHV_HUMAN]	3.22	1	2	2	2	35.42	3.22	2	2					902	101.367	8.39697
Q494X3	Zinc finger protein 404 OS=Homo sapiens GN=ZNF404 PE=2 SV=2 - [ZN404_HUMAN]	2.72	2	1	2	2	35.279	2.72	2	2					552	65.3824	9.14404
P04114	Apolipoprotein B-100 OS=Homo sapiens GN=APOB PE=1 SV=2 - [APOB_HUMAN]	0.28	1	1	2	2	35.2553	0.28	2	2					4563	515.283	7.04932
P53992	Protein transport protein Sec24C OS=Homo sapiens GN=SEC24C PE=1 SV=3 - [SC24C_HUMAN]	1.19	1	1	1	1	35.01	1.19	1	1					1094	118.249	7.06396
Q5CZC0	Fibrous sheath-interacting protein 2 OS=Homo sapiens GN=FSIP2 PE=2 SV=4 - [FSIP2_HUMAN]	0.23	1	1	2	3	34.8443	0.23	2	2	36.44	0.1	1	1	6907	780.119	6.7124
P50995	Annexin A11 OS=Homo sapiens GN=ANXA11 PE=1 SV=1 - [ANX11_HUMAN]	1.78	1	1	1	1	34.81	1.78	1	1					505	54.3551	7.6499
P48729	Casein kinase I isoform alpha OS=Homo sapiens GN=CSNK1A1 PE=1 SV=2 - [KC1A_HUMAN]	3.56	2	1	1	2	34.59	3.56	1	1	34.3	3.56	1	1	337	38.8899	9.56885
P48539	Purkinje cell protein 4 OS=Homo sapiens GN=PCP4 PE=1 SV=3 - [PCP4_HUMAN]	16.13	1	1	1	2	34.23	16.13	1	1	50.22	16.13	1	1	62	6.7873	6.7124
P24534	Elongation factor 1-beta OS=Homo sapiens GN=EEF1B2 PE=1 SV=3 - [EF1B_HUMAN]	6.67	1	1	1	2	34.12	6.67	1	1	40.1	6.67	1	1	225	24.7483	4.66553
P26641	Elongation factor 1-gamma OS=Homo sapiens GN=EEF1G PE=1 SV=3 - [EF1G_HUMAN]	4.35	1	1	2	3	34.04	2.97	1	1	53.1388	4.35	2	2	437	50.0871	6.66846
O75832	26S proteasome non-ATPase regulatory subunit 10 OS=Homo sapiens GN=PSMD10 PE=1 SV=1 - [PSD10_HUMAN]	6.64	1	2	2	4	33.8499	6.64	2	3	28.55	3.54	1	1	226	24.4124	6.1001
Q93062	RNA-binding protein with multiple splicing OS=Homo sapiens GN=RBPMS PE=1 SV=1 - [RBPMS_HUMAN]	14.8	1	2	2	3	33.8191	14.8	2	3					196	21.7882	8.07471
Q9Y5S9	RNA-binding protein 8A OS=Homo sapiens GN=RBM8A PE=1 SV=1 - [RBM8A_HUMAN]	15.52	1	2	2	2	33.8189	15.52	2	2					174	19.8767	5.71924
P46777	60S ribosomal protein L5 OS=Homo sapiens GN=RPL5 PE=1 SV=3 - [RL5_HUMAN]	4.38	1	1	1	1	33.77	4.38	1	1					297	34.3407	9.71533
Q8TAT6	Nuclear protein localization protein 4 homolog OS=Homo sapiens GN=NPLOC4 PE=1 SV=3 - [NPL4_HUMAN]	2.96	1	1	1	1	33.76	2.96	1	1					608	68.0769	6.37939
O75717	WD repeat and HMG-box DNA-binding protein 1 OS=Homo sapiens GN=WDHD1 PE=1 SV=1 - [WDHD1_HUMAN]	1.24	1	1	1	2	33.7033	1.24	1	2					1129	125.888	5.61768
P54920	Alpha-soluble NSF attachment protein OS=Homo sapiens GN=NAPA PE=1 SV=3 - [SNAA_HUMAN]	7.46	1	2	2	4	33.56	7.46	2	2	69.2505	7.46	2	2	295	33.2113	5.36377
P49815	Tuberin OS=Homo sapiens GN=TSC2 PE=1 SV=2 - [TSC2_HUMAN]	1.11	1	1	2	3	33.55	0.39	1	1	37.09	1.11	2	2	1807	200.481	7.31299
P18124	60S ribosomal protein L7 OS=Homo sapiens GN=RPL7 PE=1 SV=1 - [RL7_HUMAN]	6.05	1	1	2	2	33.53	2.82	1	1	23.86	3.23	1	1	248	29.2072	10.6528
Q12792	Twinfilin-1 OS=Homo sapiens GN=TWF1 PE=1 SV=3 - [TWF1_HUMAN]	5.43	1	1	1	1	33.49	5.43	1	1					350	40.2577	6.96143
Q9NR31	GTP-binding protein SAR1a OS=Homo sapiens GN=SAR1A PE=1 SV=1 - [SAR1A_HUMAN]	11.62	2	2	2	2	33.37	11.62	2	2					198	22.3525	6.68311
P43487	Ran-specific GTPase-activating protein OS=Homo sapiens GN=RANBP1 PE=1 SV=1 - [RANG_HUMAN]	9.95	1	2	2	2	33.21	9.95	2	2					201	23.2956	5.2876
P58546	Myotrophin OS=Homo sapiens GN=MTPN PE=1 SV=2 - [MTPN_HUMAN]	14.41	1	1	1	3	33.02	14.41	1	1	61.38	14.41	1	2	118	12.8866	5.51611
Q99714	3-hydroxyacyl-CoA dehydrogenase type-2 OS=Homo sapiens GN=HSD17B10 PE=1 SV=3 - [HCD2_HUMAN]	6.51	1	1	1	2	32.98	6.51	1	2					261	26.9061	7.78174
P08134	Rho-related GTP-binding protein RhoC OS=Homo sapiens GN=RHOC PE=1 SV=1 - [RHOC_HUMAN]	4.15	2	1	1	1	32.96	4.15	1	1					193	21.9923	6.58057
O00410	Importin-5 OS=Homo sapiens GN=IPO5 PE=1 SV=4 - [IPO5_HUMAN]	1.82	1	1	1	1	32.94	1.82	1	1					1097	123.55	4.94482
Q96JM3	Chromosome alignment-maintaining phosphoprotein 1 OS=Homo sapiens GN=CHAMP1 PE=1 SV=2 - [CHAP1_HUMAN]	2.09	1	1	1	1	32.81	2.09	1	1					812	89.0429	8.44092
P53621	Coatomer subunit alpha OS=Homo sapiens GN=COPA PE=1 SV=2 - [COPA_HUMAN]	1.06	1	1	1	1	32.77	1.06	1	1					1224	138.258	7.66455
P52907	F-actin-capping protein subunit alpha-1 OS=Homo sapiens GN=CAPZA1 PE=1 SV=3 - [CAZA1_HUMAN]	5.59	1	1	1	1	32.76	5.59	1	1					286	32.9023	5.69385
P51149	Ras-related protein Rab-7a OS=Homo sapiens GN=RAB7A PE=1 SV=1 - [RAB7A_HUMAN]	6.76	1	1	1	1	32.62	6.76	1	1					207	23.4748	6.69775
Q92570	Nuclear receptor subfamily 4 group A member 3 OS=Homo sapiens GN=NR4A3 PE=2 SV=3 - [NR4A3_HUMAN]	3.83	1	2	3	5	32.58	1.6	1	1	71.0709	3.83	3	4	626	68.1862	7.81104
Q14954	Killer cell immunoglobulin-like receptor 2DS1 OS=Homo sapiens GN=KIR2DS1 PE=2 SV=1 - [KI2S1_HUMAN]	2.3	2	1	1	2	32.3808	2.3	1	2					304	33.6245	6.56592
Q96PU8	Protein quaking OS=Homo sapiens GN=QKI PE=1 SV=1 - [QKI_HUMAN]	10.85	1	2	3	4	32.31	6.74	2	2	56.8462	5.87	2	2	341	37.6467	8.55811
P12277	Creatine kinase B-type OS=Homo sapiens GN=CKB PE=1 SV=1 - [KCRB_HUMAN]	5.51	1	1	1	1	32.15	5.51	1	1					381	42.6173	5.59229
Q66PJ3	ADP-ribosylation factor-like protein 6-interacting protein 4 OS=Homo sapiens GN=ARL6IP4 PE=1 SV=2 - [AR6P4_HUMAN]	3.8	1	1	1	3	32.04	3.8	1	1	51.46	3.8	1	2	421	44.8882	10.9312
P30041	Peroxiredoxin-6 OS=Homo sapiens GN=PRDX6 PE=1 SV=3 - [PRDX6_HUMAN]	18.3	1	3	3	3	31.9357	14.29	2	2	41.9	4.02	1	1	224	25.0192	6.37939
Q6NVV1	Putative 60S ribosomal protein L13a-like MGC87657 OS=Homo sapiens PE=5 SV=1 - [R13AX_HUMAN]	10.78	2	1	1	2	31.78	10.78	1	1	44.19	10.78	1	1	102	12.1269	10.7554
Q7KZF4	Staphylococcal nuclease domain-containing protein 1 OS=Homo sapiens GN=SND1 PE=1 SV=1 - [SND1_HUMAN]	1.43	1	1	1	1	31.71	1.43	1	1					910	101.934	7.1665
Q13243	Serine/arginine-rich splicing factor 5 OS=Homo sapiens GN=SRSF5 PE=1 SV=1 - [SRSF5_HUMAN]	4.41	1	1	1	4	31.64	4.41	1	2	63.68	4.41	1	2	272	31.2453	11.5903
P35080	Profilin-2 OS=Homo sapiens GN=PFN2 PE=1 SV=3 - [PROF2_HUMAN]	10	1	1	1	1	31.58	10	1	1					140	15.0363	6.99072
Q9Y3F4	Serine-threonine kinase receptor-associated protein OS=Homo sapiens GN=STRAP PE=1 SV=1 - [STRAP_HUMAN]	14	1	3	3	5	31.5249	8.86	2	2	75.1985	8.86	2	3	350	38.414	5.12256
O75534	Cold shock domain-containing protein E1 OS=Homo sapiens GN=CSDE1 PE=1 SV=2 - [CSDE1_HUMAN]	2.88	1	1	2	2	31.1911	2.88	2	2					798	88.8289	6.25244
O95153	Peripheral-type benzodiazepine receptor-associated protein 1 OS=Homo sapiens GN=BZRAP1 PE=1 SV=2 - [RIMB1_HUMAN]	0.32	1	1	1	1	31.13	0.32	1	1					1857	199.928	5.10986
Q12996	Cleavage stimulation factor subunit 3 OS=Homo sapiens GN=CSTF3 PE=1 SV=1 - [CSTF3_HUMAN]	1.81	1	1	1	1	30.99	1.81	1	1					717	82.8687	8.11865
P14625	Endoplasmin OS=Homo sapiens GN=HSP90B1 PE=1 SV=1 - [ENPL_HUMAN]	1.74	1	1	1	1	30.95	1.74	1	1					803	92.4113	4.84326
P46783	40S ribosomal protein S10 OS=Homo sapiens GN=RPS10 PE=1 SV=1 - [RS10_HUMAN]	14.55	2	3	3	5	30.94	13.94	2	2	74.064	14.55	2	3	165	18.8859	10.1548
Q92522	Histone H1x OS=Homo sapiens GN=H1FX PE=1 SV=1 - [H1X_HUMAN]	5.63	1	1	1	1	30.94	5.63	1	1					213	22.4735	10.7554
P18077	60S ribosomal protein L35a OS=Homo sapiens GN=RPL35A PE=1 SV=2 - [RL35A_HUMAN]	14.55	1	2	2	3	30.6977	14.55	2	2	28.57	8.18	1	1	110	12.5298	11.063
P04843	Dolichyl-diphosphooligosaccharide--protein glycosyltransferase subunit 1 OS=Homo sapiens GN=RPN1 PE=1 SV=1 - [RPN1_HUMAN]	1.98	1	1	1	2	30.51	1.98	1	2					607	68.5268	6.37939
P61326	Protein mago nashi homolog OS=Homo sapiens GN=MAGOH PE=1 SV=1 - [MGN_HUMAN]	5.48	2	1	1	1	30.38	5.48	1	1					146	17.1528	6.11279
O95396	Adenylyltransferase and sulfurtransferase MOCS3 OS=Homo sapiens GN=MOCS3 PE=1 SV=1 - [MOCS3_HUMAN]	3.26	1	1	1	1	30.31	3.26	1	1					460	49.6379	6.21436
P61956	Small ubiquitin-related modifier 2 OS=Homo sapiens GN=SUMO2 PE=1 SV=3 - [SUMO2_HUMAN]	12.63	3	1	1	2	30.23	12.63	1	1	46.44	12.63	1	1	95	10.8644	5.50342
Q8WVV9	Heterogeneous nuclear ribonucleoprotein L-like OS=Homo sapiens GN=HNRPLL PE=1 SV=1 - [HNRLL_HUMAN]	13.84	1	5	5	6	30.19	2.95	1	1	109.6	10.89	4	5	542	60.0449	7.72314
Q15121	Astrocytic phosphoprotein PEA-15 OS=Homo sapiens GN=PEA15 PE=1 SV=2 - [PEA15_HUMAN]	7.69	1	1	1	1	30.14	7.69	1	1					130	15.0308	5.021
P33991	DNA replication licensing factor MCM4 OS=Homo sapiens GN=MCM4 PE=1 SV=5 - [MCM4_HUMAN]	1.51	1	1	1	1	30.08	1.51	1	1					863	96.4976	6.7417
Q8WXX5	DnaJ homolog subfamily C member 9 OS=Homo sapiens GN=DNAJC9 PE=1 SV=1 - [DNJC9_HUMAN]	3.85	1	1	1	1	30.08	3.85	1	1					260	29.8911	5.73193
P48444	Coatomer subunit delta OS=Homo sapiens GN=ARCN1 PE=1 SV=1 - [COPD_HUMAN]	1.76	1	1	1	1	30.08	1.76	1	1					511	57.1741	6.21436
P62857	40S ribosomal protein S28 OS=Homo sapiens GN=RPS28 PE=1 SV=1 - [RS28_HUMAN]	17.39	1	1	1	3	29.99	17.39	1	1	95.9905	17.39	1	2	69	7.8362	10.6968
Q9UMS4	Pre-mRNA-processing factor 19 OS=Homo sapiens GN=PRPF19 PE=1 SV=1 - [PRP19_HUMAN]	2.18	1	1	1	1	29.96	2.18	1	1					504	55.1463	6.60986
Q8IUH3	RNA-binding protein 45 OS=Homo sapiens GN=RBM45 PE=2 SV=1 - [RBM45_HUMAN]	9.45	1	4	4	6	29.82	6.51	2	2	94.9011	9.45	4	4	476	53.4688	7.1665
O43776	Asparagine--tRNA ligase, cytoplasmic OS=Homo sapiens GN=NARS PE=1 SV=1 - [SYNC_HUMAN]	2.74	1	1	1	1	29.78	2.74	1	1					548	62.9025	6.25244
Q9NRX4	14 kDa phosphohistidine phosphatase OS=Homo sapiens GN=PHPT1 PE=1 SV=1 - [PHP14_HUMAN]	12	1	1	1	4	29.57	12	1	2	54.61	12	1	2	125	13.8237	6.07471
Q969G3	SWI/SNF-related matrix-associated actin-dependent regulator of chromatin subfamily E member 1 OS=Homo sapiens GN=SMARCE1 PE=1 SV=2 - [SMCE1_HUMAN]	3.16	1	1	1	3	29.49	3.16	1	1	48.3912	3.16	1	2	411	46.6206	4.88135
P07814	Bifunctional glutamate/proline--tRNA ligase OS=Homo sapiens GN=EPRS PE=1 SV=5 - [SYEP_HUMAN]	0.6	1	1	1	1	29.44	0.6	1	1					1512	170.483	7.32764
O75494	Serine/arginine-rich splicing factor 10 OS=Homo sapiens GN=SRSF10 PE=1 SV=1 - [SRS10_HUMAN]	8.78	2	2	2	2	29.29	4.2	1	1	23	4.58	1	1	262	31.2818	11.2681
P17987	T-complex protein 1 subunit alpha OS=Homo sapiens GN=TCP1 PE=1 SV=1 - [TCPA_HUMAN]	2.7	1	1	1	1	29.15	2.7	1	1					556	60.3056	6.11279
P11586	C-1-tetrahydrofolate synthase, cytoplasmic OS=Homo sapiens GN=MTHFD1 PE=1 SV=3 - [C1TC_HUMAN]	3.1	1	2	2	2	29.1483	3.1	2	2					935	101.495	7.29834
Q9BYV2	Tripartite motif-containing protein 54 OS=Homo sapiens GN=TRIM54 PE=1 SV=3 - [TRI54_HUMAN]	1.68	1	1	1	3	29.14	1.68	1	1	61.951	1.68	1	2	358	40.2749	5.22412
P49750	YLP motif-containing protein 1 OS=Homo sapiens GN=YLPM1 PE=1 SV=3 - [YLPM1_HUMAN]	1.79	1	2	2	2	29.12	0.67	1	1	22.46	1.13	1	1	1951	219.849	6.56592
Q86V81	THO complex subunit 4 OS=Homo sapiens GN=ALYREF PE=1 SV=3 - [THOC4_HUMAN]	23.35	1	4	4	5	28.91	12.45	2	2	75.4867	19.07	3	3	257	26.8716	11.1509
Q5JU69	Torsin-2A OS=Homo sapiens GN=TOR2A PE=2 SV=1 - [TOR2A_HUMAN]	4.98	1	1	1	1	28.8	4.98	1	1					321	35.6915	7.97217
Q8N8K9	Uncharacterized protein KIAA1958 OS=Homo sapiens GN=KIAA1958 PE=1 SV=1 - [K1958_HUMAN]	1.12	1	1	1	2	28.635	1.12	1	2					716	79.1618	6.82959
Q02241	Kinesin-like protein KIF23 OS=Homo sapiens GN=KIF23 PE=1 SV=3 - [KIF23_HUMAN]	1.35	1	1	1	1	28.59	1.35	1	1					960	109.99	8.51416
Q01081	Splicing factor U2AF 35 kDa subunit OS=Homo sapiens GN=U2AF1 PE=1 SV=3 - [U2AF1_HUMAN]	7.08	1	2	2	4	28.51	3.33	1	1	49.2648	7.08	2	3	240	27.8545	8.80713
P62280	40S ribosomal protein S11 OS=Homo sapiens GN=RPS11 PE=1 SV=3 - [RS11_HUMAN]	6.33	1	1	1	1	28.44	6.33	1	1					158	18.419	10.3013
P01620	Ig kappa chain V-III region SIE OS=Homo sapiens PE=1 SV=1 - [KV302_HUMAN]	24.77	7	2	2	3	28.34	16.51	1	1	34.2023	24.77	2	2	109	11.7678	8.48486
P18206	Vinculin OS=Homo sapiens GN=VCL PE=1 SV=4 - [VINC_HUMAN]	1.15	1	1	1	1	28.23	1.15	1	1					1134	123.722	5.65576
P61019	Ras-related protein Rab-2A OS=Homo sapiens GN=RAB2A PE=1 SV=1 - [RAB2A_HUMAN]	6.13	2	1	1	1	28.09	6.13	1	1					212	23.5308	6.53662
Q9Y230	RuvB-like 2 OS=Homo sapiens GN=RUVBL2 PE=1 SV=3 - [RUVB2_HUMAN]	2.38	1	1	1	1	27.98	2.38	1	1					463	51.1246	5.64307
Q96EP5	DAZ-associated protein 1 OS=Homo sapiens GN=DAZAP1 PE=1 SV=1 - [DAZP1_HUMAN]	9.09	1	2	3	5	27.6708	5.16	2	2	115.067	7.62	2	3	407	43.3561	8.55811
Q9NTZ6	RNA-binding protein 12 OS=Homo sapiens GN=RBM12 PE=1 SV=1 - [RBM12_HUMAN]	3.65	1	3	3	4	27.67	1.5	1	1	50.8564	3.65	3	3	932	97.3334	8.63135
P62750	60S ribosomal protein L23a OS=Homo sapiens GN=RPL23A PE=1 SV=1 - [RL23A_HUMAN]	14.1	1	2	2	3	27.66	8.33	1	1	42.3562	14.1	2	2	156	17.6841	10.4478
Q7Z739	YTH domain-containing family protein 3 OS=Homo sapiens GN=YTHDF3 PE=1 SV=1 - [YTHD3_HUMAN]	1.88	1	1	1	1	27.56	1.88	1	1					585	63.8218	9.0415
O14818	Proteasome subunit alpha type-7 OS=Homo sapiens GN=PSMA7 PE=1 SV=1 - [PSA7_HUMAN]	4.44	2	1	1	1	27.51	4.44	1	1					248	27.8696	8.45557
Q92541	RNA polymerase-associated protein RTF1 homolog OS=Homo sapiens GN=RTF1 PE=1 SV=4 - [RTF1_HUMAN]	1.55	1	1	1	1	27.51	1.55	1	1					710	80.2646	8.14795
P50502	Hsc70-interacting protein OS=Homo sapiens GN=ST13 PE=1 SV=2 - [F10A1_HUMAN]	3.25	2	1	1	1	27.36	3.25	1	1					369	41.3055	5.2749
P02786	Transferrin receptor protein 1 OS=Homo sapiens GN=TFRC PE=1 SV=2 - [TFR1_HUMAN]	6.32	1	4	4	4	27.318	2.76	2	2	47.19	3.55	2	2	760	84.8179	6.60986
P61224	Ras-related protein Rap-1b OS=Homo sapiens GN=RAP1B PE=1 SV=1 - [RAP1B_HUMAN]	5.98	2	1	1	1	27.31	5.98	1	1					184	20.8116	5.78271
Q9UN86	Ras GTPase-activating protein-binding protein 2 OS=Homo sapiens GN=G3BP2 PE=1 SV=2 - [G3BP2_HUMAN]	2.7	1	1	1	1	27.28	2.7	1	1					482	54.0878	5.5542
Q96RK4	Bardet-Biedl syndrome 4 protein OS=Homo sapiens GN=BBS4 PE=1 SV=2 - [BBS4_HUMAN]	1.16	2	1	1	2	27.04	1.16	1	1	31.61	1.16	1	1	519	58.2449	7.31299
Q15428	Splicing factor 3A subunit 2 OS=Homo sapiens GN=SF3A2 PE=1 SV=2 - [SF3A2_HUMAN]	3.02	1	1	1	1	27.04	3.02	1	1					464	49.2243	9.64209
P62491	Ras-related protein Rab-11A OS=Homo sapiens GN=RAB11A PE=1 SV=3 - [RB11A_HUMAN]	5.09	2	1	1	1	26.95	5.09	1	1					216	24.3784	6.56592
Q9UKN8	General transcription factor 3C polypeptide 4 OS=Homo sapiens GN=GTF3C4 PE=1 SV=2 - [TF3C4_HUMAN]	2.55	1	1	2	6	26.9179	2.55	2	2	54.0455	2.55	2	4	822	91.9235	6.65381
Q9NX63	Coiled-coil-helix-coiled-coil-helix domain-containing protein 3, mitochondrial OS=Homo sapiens GN=CHCHD3 PE=1 SV=1 - [CHCH3_HUMAN]	8.37	1	2	2	2	26.912	8.37	2	2					227	26.1362	8.27979
P84090	Enhancer of rudimentary homolog OS=Homo sapiens GN=ERH PE=1 SV=1 - [ERH_HUMAN]	10.58	1	1	1	1	26.84	10.58	1	1					104	12.251	5.92236
P51648	Fatty aldehyde dehydrogenase OS=Homo sapiens GN=ALDH3A2 PE=1 SV=1 - [AL3A2_HUMAN]	2.47	1	1	1	2	26.73	2.47	1	1	28.08	2.47	1	1	485	54.8129	7.88428
P30048	Thioredoxin-dependent peroxide reductase, mitochondrial OS=Homo sapiens GN=PRDX3 PE=1 SV=3 - [PRDX3_HUMAN]	5.47	1	1	1	1	26.65	5.47	1	1					256	27.6752	7.78174
Q9BXS6	Nucleolar and spindle-associated protein 1 OS=Homo sapiens GN=NUSAP1 PE=1 SV=1 - [NUSAP_HUMAN]	2.95	1	1	1	3	26.6	2.95	1	1	55.55	2.95	1	2	441	49.4219	9.90576
P50914	60S ribosomal protein L14 OS=Homo sapiens GN=RPL14 PE=1 SV=4 - [RL14_HUMAN]	5.58	1	1	1	1	26.57	5.58	1	1					215	23.417	10.9312
Q9NZM1	Myoferlin OS=Homo sapiens GN=MYOF PE=1 SV=1 - [MYOF_HUMAN]	0.34	1	1	1	1	26.42	0.34	1	1					2061	234.561	6.17627
Q15459	Splicing factor 3A subunit 1 OS=Homo sapiens GN=SF3A1 PE=1 SV=1 - [SF3A1_HUMAN]	2.02	1	1	1	1	26.3	2.02	1	1					793	88.8305	5.22412
P30101	Protein disulfide-isomerase A3 OS=Homo sapiens GN=PDIA3 PE=1 SV=4 - [PDIA3_HUMAN]	4.55	1	2	2	2	26.29	4.55	2	2					505	56.7468	6.354
P40424	Pre-B-cell leukemia transcription factor 1 OS=Homo sapiens GN=PBX1 PE=1 SV=1 - [PBX1_HUMAN]	3.26	1	1	1	1	26.21	3.26	1	1					430	46.5968	7.03467
Q56NI9	N-acetyltransferase ESCO2 OS=Homo sapiens GN=ESCO2 PE=1 SV=1 - [ESCO2_HUMAN]	3	1	1	2	3	26.1062	3	2	2	25.08	1.16	1	1	601	68.2641	9.39307
P25490	Transcriptional repressor protein YY1 OS=Homo sapiens GN=YY1 PE=1 SV=2 - [TYY1_HUMAN]	4.83	1	1	1	1	26.09	4.83	1	1					414	44.6847	6.25244
Q7L273	BTB/POZ domain-containing protein KCTD9 OS=Homo sapiens GN=KCTD9 PE=2 SV=1 - [KCTD9_HUMAN]	5.66	1	2	2	3	26.0365	5.66	2	2	31.31	1.8	1	1	389	42.5396	6.3667
P63220	40S ribosomal protein S21 OS=Homo sapiens GN=RPS21 PE=1 SV=1 - [RS21_HUMAN]	12.05	1	1	1	1	26.03	12.05	1	1					83	9.10557	8.49951
P15531	Nucleoside diphosphate kinase A OS=Homo sapiens GN=NME1 PE=1 SV=1 - [NDKA_HUMAN]	7.89	2	1	1	1	26.01	7.89	1	1					152	17.1377	6.18896
P62995	Transformer-2 protein homolog beta OS=Homo sapiens GN=TRA2B PE=1 SV=1 - [TRA2B_HUMAN]	12.85	1	3	3	6	25.9	4.86	1	1	114.928	12.85	3	5	288	33.6456	11.2534
P25705	ATP synthase subunit alpha, mitochondrial OS=Homo sapiens GN=ATP5A1 PE=1 SV=1 - [ATPA_HUMAN]	2.89	1	1	1	1	25.9	2.89	1	1					553	59.7136	9.12939
O14980	Exportin-1 OS=Homo sapiens GN=XPO1 PE=1 SV=1 - [XPO1_HUMAN]	2.71	1	1	2	2	25.87	1.03	1	1	28.57	1.68	1	1	1071	123.306	6.06201
P40763	Signal transducer and activator of transcription 3 OS=Homo sapiens GN=STAT3 PE=1 SV=2 - [STAT3_HUMAN]	1.43	1	1	1	1	25.86	1.43	1	1					770	88.0114	6.30322
P25789	Proteasome subunit alpha type-4 OS=Homo sapiens GN=PSMA4 PE=1 SV=1 - [PSA4_HUMAN]	3.07	1	1	1	1	25.73	3.07	1	1					261	29.4652	7.72314
P62269	40S ribosomal protein S18 OS=Homo sapiens GN=RPS18 PE=1 SV=3 - [RS18_HUMAN]	13.16	1	2	2	2	25.69	5.92	1	1	35.4	7.24	1	1	152	17.7079	10.9897
O75821	Eukaryotic translation initiation factor 3 subunit G OS=Homo sapiens GN=EIF3G PE=1 SV=2 - [EIF3G_HUMAN]	4.38	1	1	1	1	25.54	4.38	1	1					320	35.5889	6.12549
Q9NVA2	Septin-11 OS=Homo sapiens GN=SEPT11 PE=1 SV=3 - [SEP11_HUMAN]	2.1	5	1	1	1	25.44	2.1	1	1					429	49.3672	6.81494
Q86XP3	ATP-dependent RNA helicase DDX42 OS=Homo sapiens GN=DDX42 PE=1 SV=1 - [DDX42_HUMAN]	1.17	1	1	1	1	25.33	1.17	1	1					938	102.912	7.02002
P62861	40S ribosomal protein S30 OS=Homo sapiens GN=FAU PE=1 SV=1 - [RS30_HUMAN]	16.95	1	1	1	2	25.21	16.95	1	1	23.14	16.95	1	1	59	6.64382	12.147
Q4VCS5	Angiomotin OS=Homo sapiens GN=AMOT PE=1 SV=1 - [AMOT_HUMAN]	2.77	1	2	2	2	25.14	0.92	1	1	31.29	1.85	1	1	1084	118.013	7.63525
Q86YZ3	Hornerin OS=Homo sapiens GN=HRNR PE=1 SV=2 - [HORN_HUMAN]	9.19	1	3	4	4	24.9814	4.35	2	2	24.5986	4.84	2	2	2850	282.228	10.0376
Q02790	Peptidyl-prolyl cis-trans isomerase FKBP4 OS=Homo sapiens GN=FKBP4 PE=1 SV=3 - [FKBP4_HUMAN]	6.54	1	2	2	2	24.96	2.83	1	1	37.17	3.7	1	1	459	51.7721	5.42725
Q9Y5B9	FACT complex subunit SPT16 OS=Homo sapiens GN=SUPT16H PE=1 SV=1 - [SP16H_HUMAN]	1.43	1	1	1	2	24.94	1.43	1	1	24.02	1.43	1	1	1047	119.838	5.65576
P61604	10 kDa heat shock protein, mitochondrial OS=Homo sapiens GN=HSPE1 PE=1 SV=2 - [CH10_HUMAN]	13.73	1	1	1	1	24.82	13.73	1	1					102	10.9249	8.92432
P46778	60S ribosomal protein L21 OS=Homo sapiens GN=RPL21 PE=1 SV=2 - [RL21_HUMAN]	6.88	1	1	1	1	24.81	6.88	1	1					160	18.5531	10.4917
Q96GA7	Serine dehydratase-like OS=Homo sapiens GN=SDSL PE=1 SV=1 - [SDSL_HUMAN]	3.95	1	1	1	1	24.78	3.95	1	1					329	34.6521	6.88818
P51610	Host cell factor 1 OS=Homo sapiens GN=HCFC1 PE=1 SV=2 - [HCFC1_HUMAN]	1.03	1	2	2	2	24.77	0.54	1	1	34.12	0.49	1	1	2035	208.602	7.45947
P05455	Lupus La protein OS=Homo sapiens GN=SSB PE=1 SV=2 - [LA_HUMAN]	6.37	1	2	2	2	24.74	3.19	1	1	25.61	3.19	1	1	408	46.8082	7.12256
P62888	60S ribosomal protein L30 OS=Homo sapiens GN=RPL30 PE=1 SV=2 - [RL30_HUMAN]	9.57	1	1	1	1	24.56	9.57	1	1					115	12.7757	9.62744
O75475	PC4 and SFRS1-interacting protein OS=Homo sapiens GN=PSIP1 PE=1 SV=1 - [PSIP1_HUMAN]	3.02	3	1	2	2	24.5	3.02	2	2					530	60.0667	9.12939
Q15637	Splicing factor 1 OS=Homo sapiens GN=SF1 PE=1 SV=4 - [SF01_HUMAN]	10.8	1	4	4	4	24.49	1.41	1	1	51.8537	9.39	3	3	639	68.2859	8.98291
O00203	AP-3 complex subunit beta-1 OS=Homo sapiens GN=AP3B1 PE=1 SV=3 - [AP3B1_HUMAN]	1.83	2	1	2	2	24.47	1.19	1	1	25.92	0.64	1	1	1094	121.245	6.03662
Q9HAV4	Exportin-5 OS=Homo sapiens GN=XPO5 PE=1 SV=1 - [XPO5_HUMAN]	1.08	1	1	1	2	24.41	1.08	1	1	22.57	1.08	1	1	1204	136.222	5.79541
Q15427	Splicing factor 3B subunit 4 OS=Homo sapiens GN=SF3B4 PE=1 SV=1 - [SF3B4_HUMAN]	3.3	1	1	1	1	24.37	3.3	1	1					424	44.3571	8.55811
Q92973	Transportin-1 OS=Homo sapiens GN=TNPO1 PE=1 SV=2 - [TNPO1_HUMAN]	2.56	1	2	2	2	24.27	1.22	1	1	41.04	1.34	1	1	898	102.289	4.98291
P35251	Replication factor C subunit 1 OS=Homo sapiens GN=RFC1 PE=1 SV=4 - [RFC1_HUMAN]	1.57	1	1	1	1	24.23	1.57	1	1					1148	128.175	9.36377
P60983	Glia maturation factor beta OS=Homo sapiens GN=GMFB PE=1 SV=2 - [GMFB_HUMAN]	7.75	1	1	1	1	24.17	7.75	1	1					142	16.7025	5.2876
Q15056	Eukaryotic translation initiation factor 4H OS=Homo sapiens GN=EIF4H PE=1 SV=5 - [IF4H_HUMAN]	8.87	1	1	2	2	24.08	3.63	1	1	40.12	5.24	1	1	248	27.3684	7.2251
O00472	RNA polymerase II elongation factor ELL2 OS=Homo sapiens GN=ELL2 PE=1 SV=2 - [ELL2_HUMAN]	1.09	1	1	1	1	24.07	1.09	1	1					640	72.2798	8.99756
O76094	Signal recognition particle subunit SRP72 OS=Homo sapiens GN=SRP72 PE=1 SV=3 - [SRP72_HUMAN]	2.53	1	1	1	1	24.06	2.53	1	1					671	74.56	9.26123
Q99613	Eukaryotic translation initiation factor 3 subunit C OS=Homo sapiens GN=EIF3C PE=1 SV=1 - [EIF3C_HUMAN]	2.08	2	1	1	1	24.06	2.08	1	1					913	105.278	5.68115
P08263	Glutathione S-transferase A1 OS=Homo sapiens GN=GSTA1 PE=1 SV=3 - [GSTA1_HUMAN]	4.05	4	1	1	2	23.95	4.05	1	1	29.81	4.05	1	1	222	25.6147	8.88037
Q9Y316	Protein MEMO1 OS=Homo sapiens GN=MEMO1 PE=1 SV=1 - [MEMO1_HUMAN]	4.38	1	1	1	2	23.91	4.38	1	1	23.9	4.38	1	1	297	33.7115	7.13721
Q14671	Pumilio homolog 1 OS=Homo sapiens GN=PUM1 PE=1 SV=3 - [PUM1_HUMAN]	0.84	1	1	1	1	23.91	0.84	1	1					1186	126.395	6.84424
P42766	60S ribosomal protein L35 OS=Homo sapiens GN=RPL35 PE=1 SV=2 - [RL35_HUMAN]	8.13	1	1	1	3	23.9	8.13	1	1	52.3	8.13	1	2	123	14.5426	11.0483
P19105	Myosin regulatory light chain 12A OS=Homo sapiens GN=MYL12A PE=1 SV=2 - [ML12A_HUMAN]	6.43	2	1	1	1	23.58	6.43	1	1					171	19.7815	4.80518
P30040	Endoplasmic reticulum resident protein 29 OS=Homo sapiens GN=ERP29 PE=1 SV=4 - [ERP29_HUMAN]	5.75	1	1	1	1	23.51	5.75	1	1					261	28.9752	7.31299
O75367	Core histone macro-H2A.1 OS=Homo sapiens GN=H2AFY PE=1 SV=4 - [H2AY_HUMAN]	2.42	2	1	1	3	23.42	2.42	1	1	35.2589	2.42	1	2	372	39.5925	9.78857
P50454	Serpin H1 OS=Homo sapiens GN=SERPINH1 PE=1 SV=2 - [SERPH_HUMAN]	3.59	1	1	1	1	23.41	3.59	1	1					418	46.4112	8.68994
P47756	F-actin-capping protein subunit beta OS=Homo sapiens GN=CAPZB PE=1 SV=4 - [CAPZB_HUMAN]	5.05	1	1	1	1	23.34	5.05	1	1					277	31.3308	5.59229
P62714	Serine/threonine-protein phosphatase 2A catalytic subunit beta isoform OS=Homo sapiens GN=PPP2CB PE=1 SV=1 - [PP2AB_HUMAN]	3.56	2	1	1	1	23.2	3.56	1	1					309	35.5523	5.42725
Q06210	Glutamine--fructose-6-phosphate aminotransferase [isomerizing] 1 OS=Homo sapiens GN=GFPT1 PE=1 SV=3 - [GFPT1_HUMAN]	2.29	1	1	1	1	23.17	2.29	1	1					699	78.7563	7.10791
Q14258	E3 ubiquitin/ISG15 ligase TRIM25 OS=Homo sapiens GN=TRIM25 PE=1 SV=2 - [TRI25_HUMAN]	1.9	1	1	1	1	23.16	1.9	1	1					630	70.9277	8.08936
P98082	Disabled homolog 2 OS=Homo sapiens GN=DAB2 PE=1 SV=3 - [DAB2_HUMAN]	1.04	1	1	1	1	23.08	1.04	1	1					770	82.397	5.52881
Q16543	Hsp90 co-chaperone Cdc37 OS=Homo sapiens GN=CDC37 PE=1 SV=1 - [CDC37_HUMAN]	4.5	1	1	1	1	23.03	4.5	1	1					378	44.44	5.24951
Q8IY50	Solute carrier family 35 member F3 OS=Homo sapiens GN=SLC35F3 PE=2 SV=2 - [S35F3_HUMAN]	1.66	1	1	1	3	23.01	1.66	1	1	25.29	1.66	1	2	421	46.787	9.48096
P62140	Serine/threonine-protein phosphatase PP1-beta catalytic subunit OS=Homo sapiens GN=PPP1CB PE=1 SV=3 - [PP1B_HUMAN]	3.06	1	1	1	1	23.01	3.06	1	1					327	37.1626	6.18896
P56537	Eukaryotic translation initiation factor 6 OS=Homo sapiens GN=EIF6 PE=1 SV=1 - [IF6_HUMAN]	5.71	1	1	1	1	23.01	5.71	1	1					245	26.5822	4.67822
Q9UQE7	Structural maintenance of chromosomes protein 3 OS=Homo sapiens GN=SMC3 PE=1 SV=2 - [SMC3_HUMAN]	0.99	1	1	1	1	22.91	0.99	1	1					1217	141.454	7.18115
Q8WZ42	Titin OS=Homo sapiens GN=TTN PE=1 SV=4 - [TITIN_HUMAN]	0.07	1	1	4	6	22.8242	0.05	3	3	43.9109	0.05	3	3	34350	3813.65	6.354
P68036	Ubiquitin-conjugating enzyme E2 L3 OS=Homo sapiens GN=UBE2L3 PE=1 SV=1 - [UB2L3_HUMAN]	14.29	1	1	1	1	22.8	14.29	1	1					154	17.8502	8.51416
Q86U42	Polyadenylate-binding protein 2 OS=Homo sapiens GN=PABPN1 PE=1 SV=3 - [PABP2_HUMAN]	21.57	1	3	3	3	22.7	3.27	1	1	46.0196	18.3	2	2	306	32.729	5.05908
Q00341	Vigilin OS=Homo sapiens GN=HDLBP PE=1 SV=2 - [VIGLN_HUMAN]	0.95	1	1	1	1	22.64	0.95	1	1					1268	141.368	6.87354
Q92499	ATP-dependent RNA helicase DDX1 OS=Homo sapiens GN=DDX1 PE=1 SV=2 - [DDX1_HUMAN]	7.7	1	5	5	6	22.61	1.08	1	1	116.605	6.62	4	5	740	82.3798	7.2251
Q9UI30	tRNA methyltransferase 112 homolog OS=Homo sapiens GN=TRMT112 PE=1 SV=1 - [TR112_HUMAN]	11.2	1	1	1	2	22.6	11.2	1	1	51.17	11.2	1	1	125	14.1903	5.26221
Q9BZJ4	Solute carrier family 25 member 39 OS=Homo sapiens GN=SLC25A39 PE=2 SV=2 - [S2539_HUMAN]	3.34	1	1	1	2	22.5225	3.34	1	2					359	39.2234	9.61279
Q14247	Src substrate cortactin OS=Homo sapiens GN=CTTN PE=1 SV=2 - [SRC8_HUMAN]	5.45	1	2	2	4	22.51	2.36	1	1	103.37	5.45	2	3	550	61.5485	5.40186
Q93009	Ubiquitin carboxyl-terminal hydrolase 7 OS=Homo sapiens GN=USP7 PE=1 SV=2 - [UBP7_HUMAN]	1.81	1	2	2	2	22.44	0.73	1	1	30.97	1.09	1	1	1102	128.22	5.5542
Q14683	Structural maintenance of chromosomes protein 1A OS=Homo sapiens GN=SMC1A PE=1 SV=2 - [SMC1A_HUMAN]	2.19	1	2	3	3	22.43	0.89	1	1	34.8981	1.3	2	2	1233	143.144	7.63525
Q9UJZ1	Stomatin-like protein 2, mitochondrial OS=Homo sapiens GN=STOML2 PE=1 SV=1 - [STML2_HUMAN]	5.9	1	1	1	1	22.4	5.9	1	1					356	38.5102	7.38623
Q9UQR1	Zinc finger protein 148 OS=Homo sapiens GN=ZNF148 PE=1 SV=2 - [ZN148_HUMAN]	1.01	1	1	1	1	22.29	1.01	1	1					794	88.9206	6.48096
Q9UBV8	Peflin OS=Homo sapiens GN=PEF1 PE=1 SV=1 - [PEF1_HUMAN]	8.1	1	2	2	3	22.09	3.52	1	1	60.1906	8.1	2	2	284	30.3613	6.53662
Q13547	Histone deacetylase 1 OS=Homo sapiens GN=HDAC1 PE=1 SV=1 - [HDAC1_HUMAN]	2.49	2	1	1	3	22.09	2.49	1	1	35.3	2.49	1	2	482	55.0677	5.47803
P57730	Caspase recruitment domain-containing protein 18 OS=Homo sapiens GN=CARD18 PE=1 SV=1 - [CAR18_HUMAN]	10	1	1	1	1	21.63	10	1	1					90	10.1312	6.75635
P49327	Fatty acid synthase OS=Homo sapiens GN=FASN PE=1 SV=3 - [FAS_HUMAN]	0.36	1	1	1	1	21.3	0.36	1	1					2511	273.254	6.44287
P26583	High mobility group protein B2 OS=Homo sapiens GN=HMGB2 PE=1 SV=2 - [HMGB2_HUMAN]	5.26	1	1	1	3	20.98	5.26	1	1	45.84	5.26	1	2	209	24.0187	7.81104
Q5VYK3	Proteasome-associated protein ECM29 homolog OS=Homo sapiens GN=ECM29 PE=1 SV=2 - [ECM29_HUMAN]	0.81	1	1	1	1	20.73	0.81	1	1					1845	204.16	7.12256
P15927	Replication protein A 32 kDa subunit OS=Homo sapiens GN=RPA2 PE=1 SV=1 - [RFA2_HUMAN]	4.44	1	1	1	1	20.26	4.44	1	1					270	29.2285	6.15088
Q96T37	Putative RNA-binding protein 15 OS=Homo sapiens GN=RBM15 PE=1 SV=2 - [RBM15_HUMAN]	4.09	1	3	3	4	20.21	1.84	1	1	36.087	2.25	2	3	977	107.124	10.0815
P16152	Carbonyl reductase [NADPH] 1 OS=Homo sapiens GN=CBR1 PE=1 SV=3 - [CBR1_HUMAN]	17.69	2	3	3	4	0	2.89	1	1	71.9466	17.69	3	3	277	30.3559	8.32373
Q9NUD5	Zinc finger CCHC domain-containing protein 3 OS=Homo sapiens GN=ZCCHC3 PE=1 SV=1 - [ZCHC3_HUMAN]	1.98	1	1	1	1	0	1.98	1	1					404	43.5909	8.52881
P45974	Ubiquitin carboxyl-terminal hydrolase 5 OS=Homo sapiens GN=USP5 PE=1 SV=2 - [UBP5_HUMAN]	9.56	1	4	5	6					95.3903	9.56	5	6	858	95.7253	5.03369
P13489	Ribonuclease inhibitor OS=Homo sapiens GN=RNH1 PE=1 SV=2 - [RINI_HUMAN]	3.25	1	1	1	3					75.8867	3.25	1	3	461	49.9411	4.81787
Q6UN15	Pre-mRNA 3'-end-processing factor FIP1 OS=Homo sapiens GN=FIP1L1 PE=1 SV=1 - [FIP1_HUMAN]	7.74	1	3	3	3					75.4851	7.74	3	3	594	66.4865	5.59229
Q09161	Nuclear cap-binding protein subunit 1 OS=Homo sapiens GN=NCBP1 PE=1 SV=1 - [NCBP1_HUMAN]	2.66	1	2	2	3					74.1671	2.66	2	3	790	91.7805	6.43018
P49458	Signal recognition particle 9 kDa protein OS=Homo sapiens GN=SRP9 PE=1 SV=2 - [SRP09_HUMAN]	22.09	1	2	2	2					72.5035	22.09	2	2	86	10.1051	7.97217
O43396	Thioredoxin-like protein 1 OS=Homo sapiens GN=TXNL1 PE=1 SV=3 - [TXNL1_HUMAN]	5.19	1	1	1	1					69.46	5.19	1	1	289	32.2307	4.95752
P62851	40S ribosomal protein S25 OS=Homo sapiens GN=RPS25 PE=1 SV=1 - [RS25_HUMAN]	7.2	1	1	1	2					66.9948	7.2	1	2	125	13.7337	10.1108
P62314	Small nuclear ribonucleoprotein Sm D1 OS=Homo sapiens GN=SNRPD1 PE=1 SV=1 - [SMD1_HUMAN]	10.92	1	1	1	2					58.9064	10.92	1	2	119	13.2734	11.561
Q9UPT8	Zinc finger CCCH domain-containing protein 4 OS=Homo sapiens GN=ZC3H4 PE=1 SV=3 - [ZC3H4_HUMAN]	1.77	1	1	1	2					53.01	1.77	1	2	1303	140.169	6.26514
Q01105	Protein SET OS=Homo sapiens GN=SET PE=1 SV=3 - [SET_HUMAN]	8.28	2	2	2	3					52.5567	8.28	2	3	290	33.4687	4.32275
Q96T60	Bifunctional polynucleotide phosphatase/kinase OS=Homo sapiens GN=PNKP PE=1 SV=1 - [PNKP_HUMAN]	2.5	1	1	1	2					52.06	2.5	1	2	521	57.0405	8.45557
O75340	Programmed cell death protein 6 OS=Homo sapiens GN=PDCD6 PE=1 SV=1 - [PDCD6_HUMAN]	5.24	1	1	1	2					51.16	5.24	1	2	191	21.8548	5.40186
Q6UXN9	WD repeat-containing protein 82 OS=Homo sapiens GN=WDR82 PE=1 SV=1 - [WDR82_HUMAN]	6.39	1	1	1	1					48.01	6.39	1	1	313	35.0565	7.69385
P62263	40S ribosomal protein S14 OS=Homo sapiens GN=RPS14 PE=1 SV=3 - [RS14_HUMAN]	13.91	1	1	1	2					47.96	13.91	1	2	151	16.2625	10.0522
Q14320	Protein FAM50A OS=Homo sapiens GN=FAM50A PE=1 SV=2 - [FA50A_HUMAN]	5.6	2	1	2	2					47.95	5.6	2	2	339	40.2165	6.82959
P38606	V-type proton ATPase catalytic subunit A OS=Homo sapiens GN=ATP6V1A PE=1 SV=2 - [VATA_HUMAN]	2.43	1	1	1	2					47.63	2.43	1	2	617	68.2605	5.51611
P00568	Adenylate kinase isoenzyme 1 OS=Homo sapiens GN=AK1 PE=1 SV=3 - [KAD1_HUMAN]	5.67	1	1	1	1					47.04	5.67	1	1	194	21.6213	8.63135
P06733	Alpha-enolase OS=Homo sapiens GN=ENO1 PE=1 SV=2 - [ENOA_HUMAN]	2.76	1	1	1	1					46.36	2.76	1	1	434	47.1393	7.38623
P80748	Ig lambda chain V-III region LOI OS=Homo sapiens PE=1 SV=1 - [LV302_HUMAN]	21.62	1	2	2	2					45.78	21.62	2	2	111	11.9278	5.08447
P25398	40S ribosomal protein S12 OS=Homo sapiens GN=RPS12 PE=1 SV=3 - [RS12_HUMAN]	6.06	1	1	1	1					45.61	6.06	1	1	132	14.5055	7.21045
Q9NW64	Pre-mRNA-splicing factor RBM22 OS=Homo sapiens GN=RBM22 PE=1 SV=1 - [RBM22_HUMAN]	2.62	1	1	1	1					45.06	2.62	1	1	420	46.8654	8.54346
Q9NY12	H/ACA ribonucleoprotein complex subunit 1 OS=Homo sapiens GN=GAR1 PE=1 SV=1 - [GAR1_HUMAN]	4.15	1	1	1	1					43.1	4.15	1	1	217	22.3342	10.9165
Q9BVP2	Guanine nucleotide-binding protein-like 3 OS=Homo sapiens GN=GNL3 PE=1 SV=2 - [GNL3_HUMAN]	4.37	1	1	1	1					42.28	4.37	1	1	549	61.9545	9.15869
P46779	60S ribosomal protein L28 OS=Homo sapiens GN=RPL28 PE=1 SV=3 - [RL28_HUMAN]	13.14	1	1	2	2					41.8375	13.14	2	2	137	15.7377	12.0151
Q13363	C-terminal-binding protein 1 OS=Homo sapiens GN=CTBP1 PE=1 SV=2 - [CTBP1_HUMAN]	2.05	2	1	1	1					41.03	2.05	1	1	440	47.5055	6.771
O43148	mRNA cap guanine-N7 methyltransferase OS=Homo sapiens GN=RNMT PE=1 SV=1 - [MCES_HUMAN]	3.99	1	1	1	1					40.07	3.99	1	1	476	54.8093	6.60986
O43823	A-kinase anchor protein 8 OS=Homo sapiens GN=AKAP8 PE=1 SV=1 - [AKAP8_HUMAN]	1.73	1	1	1	1					39.45	1.73	1	1	692	76.0611	5.14795
Q05048	Cleavage stimulation factor subunit 1 OS=Homo sapiens GN=CSTF1 PE=1 SV=1 - [CSTF1_HUMAN]	2.09	1	1	1	1					38.91	2.09	1	1	431	48.3267	6.58057
Q92688	Acidic leucine-rich nuclear phosphoprotein 32 family member B OS=Homo sapiens GN=ANP32B PE=1 SV=1 - [AN32B_HUMAN]	4.38	1	1	1	1					38.79	4.38	1	1	251	28.7703	4.05615
O43251	RNA binding protein fox-1 homolog 2 OS=Homo sapiens GN=RBFOX2 PE=1 SV=3 - [RFOX2_HUMAN]	3.85	2	1	1	1					38.53	3.85	1	1	390	41.3484	7.26904
Q9UPN9	E3 ubiquitin-protein ligase TRIM33 OS=Homo sapiens GN=TRIM33 PE=1 SV=3 - [TRI33_HUMAN]	1.15	1	1	1	1					38.43	1.15	1	1	1127	122.456	6.66846
P10632	Cytochrome P450 2C8 OS=Homo sapiens GN=CYP2C8 PE=1 SV=2 - [CP2C8_HUMAN]	1.22	4	1	1	2					37.8188	1.22	1	2	490	55.7887	8.49951
O15347	High mobility group protein B3 OS=Homo sapiens GN=HMGB3 PE=1 SV=4 - [HMGB3_HUMAN]	7	1	1	1	2					37.66	7	1	2	200	22.9654	8.36768
Q9Y2L1	Exosome complex exonuclease RRP44 OS=Homo sapiens GN=DIS3 PE=1 SV=2 - [RRP44_HUMAN]	1.36	1	1	1	1					36.57	1.36	1	1	958	108.934	7.13721
O15164	Transcription intermediary factor 1-alpha OS=Homo sapiens GN=TRIM24 PE=1 SV=3 - [TIF1A_HUMAN]	1.24	1	1	1	1					36.37	1.24	1	1	1050	116.757	7.10791
Q00577	Transcriptional activator protein Pur-alpha OS=Homo sapiens GN=PURA PE=1 SV=2 - [PURA_HUMAN]	9.94	1	2	2	2					36.2741	9.94	2	2	322	34.8894	6.44287
Q8TAP9	M-phase-specific PLK1-interacting protein OS=Homo sapiens GN=MPLKIP PE=1 SV=1 - [MPLKI_HUMAN]	13.97	1	1	1	1					35.95	13.97	1	1	179	19.1351	10.228
Q04446	1,4-alpha-glucan-branching enzyme OS=Homo sapiens GN=GBE1 PE=1 SV=3 - [GLGB_HUMAN]	3.28	1	2	2	2					35.8209	3.28	2	2	702	80.4226	6.31592
P06744	Glucose-6-phosphate isomerase OS=Homo sapiens GN=GPI PE=1 SV=4 - [G6PI_HUMAN]	2.69	1	1	1	1					35.78	2.69	1	1	558	63.1072	8.32373
P42677	40S ribosomal protein S27 OS=Homo sapiens GN=RPS27 PE=1 SV=3 - [RS27_HUMAN]	15.48	2	1	1	1					35.36	15.48	1	1	84	9.45484	9.45166
Q99471	Prefoldin subunit 5 OS=Homo sapiens GN=PFDN5 PE=1 SV=2 - [PFD5_HUMAN]	9.74	1	1	1	1					35.36	9.74	1	1	154	17.317	6.32861
P18846	Cyclic AMP-dependent transcription factor ATF-1 OS=Homo sapiens GN=ATF1 PE=1 SV=2 - [ATF1_HUMAN]	5.9	2	1	2	2					35.3373	5.9	2	2	271	29.2147	8.36768
Q9BWH2	FUN14 domain-containing protein 2 OS=Homo sapiens GN=FUNDC2 PE=1 SV=2 - [FUND2_HUMAN]	4.76	1	1	1	1					35.19	4.76	1	1	189	20.6627	9.72998
P68402	Platelet-activating factor acetylhydrolase IB subunit beta OS=Homo sapiens GN=PAFAH1B2 PE=1 SV=1 - [PA1B2_HUMAN]	3.93	1	1	1	1					35.1	3.93	1	1	229	25.5531	5.92236
O94776	Metastasis-associated protein MTA2 OS=Homo sapiens GN=MTA2 PE=1 SV=1 - [MTA2_HUMAN]	4.34	1	1	2	2					34.67	4.34	2	2	668	74.9757	9.65674
Q9C0J8	pre-mRNA 3' end processing protein WDR33 OS=Homo sapiens GN=WDR33 PE=1 SV=2 - [WDR33_HUMAN]	0.9	1	1	1	1					33.67	0.9	1	1	1336	145.799	9.17334
P43034	Platelet-activating factor acetylhydrolase IB subunit alpha OS=Homo sapiens GN=PAFAH1B1 PE=1 SV=2 - [LIS1_HUMAN]	3.66	1	1	1	1					32.66	3.66	1	1	410	46.6082	7.37158
P09382	Galectin-1 OS=Homo sapiens GN=LGALS1 PE=1 SV=2 - [LEG1_HUMAN]	11.85	1	1	1	1					32.58	11.85	1	1	135	14.7062	5.50342
O76003	Glutaredoxin-3 OS=Homo sapiens GN=GLRX3 PE=1 SV=2 - [GLRX3_HUMAN]	3.28	1	1	1	1					32.07	3.28	1	1	335	37.4082	5.38916
Q96DI7	U5 small nuclear ribonucleoprotein 40 kDa protein OS=Homo sapiens GN=SNRNP40 PE=1 SV=1 - [SNR40_HUMAN]	8.4	1	1	1	1					32.01	8.4	1	1	357	39.2857	8.104
Q9Y3B4	Pre-mRNA branch site protein p14 OS=Homo sapiens GN=SF3B14 PE=1 SV=1 - [PM14_HUMAN]	9.6	1	1	1	1					31.9	9.6	1	1	125	14.5756	9.37842
Q9UH17	DNA dC->dU-editing enzyme APOBEC-3B OS=Homo sapiens GN=APOBEC3B PE=1 SV=1 - [ABC3B_HUMAN]	4.19	2	1	1	1					31.64	4.19	1	1	382	45.8941	6.06201
P18583	Protein SON OS=Homo sapiens GN=SON PE=1 SV=4 - [SON_HUMAN]	0.66	1	1	1	1					31.32	0.66	1	1	2426	263.664	5.64307
Q7Z3D6	UPF0317 protein C14orf159, mitochondrial OS=Homo sapiens GN=C14orf159 PE=1 SV=2 - [CN159_HUMAN]	1.62	1	1	1	1					30.74	1.62	1	1	616	66.394	6.78564
Q9NWH9	SAFB-like transcription modulator OS=Homo sapiens GN=SLTM PE=1 SV=2 - [SLTM_HUMAN]	0.77	1	1	1	1					30.62	0.77	1	1	1034	117.079	7.86963
Q9NYF8	Bcl-2-associated transcription factor 1 OS=Homo sapiens GN=BCLAF1 PE=1 SV=2 - [BCLF1_HUMAN]	2.83	1	2	3	3					30.5983	2.83	3	3	920	106.059	9.979
Q9H3K6	BolA-like protein 2 OS=Homo sapiens GN=BOLA2 PE=1 SV=1 - [BOLA2_HUMAN]	18.6	1	1	1	1					30.1	18.6	1	1	86	10.1102	6.52197
Q16527	Cysteine and glycine-rich protein 2 OS=Homo sapiens GN=CSRP2 PE=1 SV=3 - [CSRP2_HUMAN]	7.77	1	1	1	1					29.74	7.77	1	1	193	20.9399	8.6167
Q9H2P0	Activity-dependent neuroprotector homeobox protein OS=Homo sapiens GN=ADNP PE=1 SV=1 - [ADNP_HUMAN]	1.72	1	1	1	1					29.44	1.72	1	1	1102	123.485	7.34229
Q6ZP82	Coiled-coil domain-containing protein 141 OS=Homo sapiens GN=CCDC141 PE=1 SV=2 - [CC141_HUMAN]	0.55	1	1	1	1					29.03	0.55	1	1	1450	166.157	5.57959
Q96T68	Histone-lysine N-methyltransferase SETDB2 OS=Homo sapiens GN=SETDB2 PE=1 SV=2 - [SETB2_HUMAN]	2.36	1	1	2	2					28.9259	2.36	2	2	719	81.8424	7.50342
Q9NX05	Constitutive coactivator of PPAR-gamma-like protein 2 OS=Homo sapiens GN=FAM120C PE=2 SV=3 - [F120C_HUMAN]	1	1	1	1	1					28.74	1	1	1	1096	120.511	9.02686
O75531	Barrier-to-autointegration factor OS=Homo sapiens GN=BANF1 PE=1 SV=1 - [BAF_HUMAN]	26.97	1	1	1	1					28.65	26.97	1	1	89	10.052	6.0874
Q16763	Ubiquitin-conjugating enzyme E2 S OS=Homo sapiens GN=UBE2S PE=1 SV=2 - [UBE2S_HUMAN]	5.41	1	1	1	1					28.22	5.41	1	1	222	23.8305	8.38232
Q9UFW8	CGG triplet repeat-binding protein 1 OS=Homo sapiens GN=CGGBP1 PE=1 SV=2 - [CGBP1_HUMAN]	10.78	1	2	2	2					28.1106	10.78	2	2	167	18.8086	8.95361
O15042	U2 snRNP-associated SURP motif-containing protein OS=Homo sapiens GN=U2SURP PE=1 SV=2 - [SR140_HUMAN]	1.55	1	1	2	2					27.8966	1.55	2	2	1029	118.219	8.47021
Q6ZSR9	Uncharacterized protein FLJ45252 OS=Homo sapiens PE=1 SV=2 - [YJ005_HUMAN]	5.07	1	1	1	1					27.52	5.07	1	1	355	37.9526	5.26221
P00352	Retinal dehydrogenase 1 OS=Homo sapiens GN=ALDH1A1 PE=1 SV=2 - [AL1A1_HUMAN]	3.39	1	1	1	1					27.5	3.39	1	1	501	54.827	6.72705
P47914	60S ribosomal protein L29 OS=Homo sapiens GN=RPL29 PE=1 SV=2 - [RL29_HUMAN]	9.43	1	1	1	1					27.42	9.43	1	1	159	17.7411	11.6636
O75446	Histone deacetylase complex subunit SAP30 OS=Homo sapiens GN=SAP30 PE=1 SV=1 - [SAP30_HUMAN]	3.18	1	1	1	1					27.35	3.18	1	1	220	23.2919	9.17334
P15559	NAD(P)H dehydrogenase [quinone] 1 OS=Homo sapiens GN=NQO1 PE=1 SV=1 - [NQO1_HUMAN]	6.57	1	1	1	1					26.97	6.57	1	1	274	30.848	8.88037
Q96GX5	Serine/threonine-protein kinase greatwall OS=Homo sapiens GN=MASTL PE=1 SV=1 - [GWL_HUMAN]	0.8	1	1	1	1					26.65	0.8	1	1	879	97.2572	5.98584
P52298	Nuclear cap-binding protein subunit 2 OS=Homo sapiens GN=NCBP2 PE=1 SV=1 - [NCBP2_HUMAN]	7.05	1	1	1	1					26.22	7.05	1	1	156	17.9898	8.20654
P46109	Crk-like protein OS=Homo sapiens GN=CRKL PE=1 SV=1 - [CRKL_HUMAN]	8.25	1	1	1	1					25.93	8.25	1	1	303	33.7559	6.7417
Q16531	DNA damage-binding protein 1 OS=Homo sapiens GN=DDB1 PE=1 SV=1 - [DDB1_HUMAN]	2.63	1	1	1	1					25.45	2.63	1	1	1140	126.887	5.26221
P02042	Hemoglobin subunit delta OS=Homo sapiens GN=HBD PE=1 SV=2 - [HBD_HUMAN]	6.8	5	1	1	1					25.26	6.8	1	1	147	16.0453	8.04541
Q6P1J9	Parafibromin OS=Homo sapiens GN=CDC73 PE=1 SV=1 - [CDC73_HUMAN]	1.88	1	1	1	1					24.65	1.88	1	1	531	60.5391	9.61279
P51587	Breast cancer type 2 susceptibility protein OS=Homo sapiens GN=BRCA2 PE=1 SV=2 - [BRCA2_HUMAN]	0.47	1	1	1	1					24.59	0.47	1	1	3418	383.986	6.72705
Q14691	DNA replication complex GINS protein PSF1 OS=Homo sapiens GN=GINS1 PE=1 SV=1 - [PSF1_HUMAN]	7.14	1	1	1	1					24.54	7.14	1	1	196	22.9736	7.38623
Q8WWY3	U4/U6 small nuclear ribonucleoprotein Prp31 OS=Homo sapiens GN=PRPF31 PE=1 SV=2 - [PRP31_HUMAN]	3.01	1	1	1	1					24.08	3.01	1	1	499	55.4214	5.78271
O60739	Eukaryotic translation initiation factor 1b OS=Homo sapiens GN=EIF1B PE=1 SV=2 - [EIF1B_HUMAN]	12.39	2	1	1	1					23.77	12.39	1	1	113	12.8157	7.37158
O00193	Small acidic protein OS=Homo sapiens GN=SMAP PE=1 SV=1 - [SMAP_HUMAN]	8.74	1	1	1	1					23.32	8.74	1	1	183	20.3202	4.71631
Q9H8Y5	Ankyrin repeat and zinc finger domain-containing protein 1 OS=Homo sapiens GN=ANKZF1 PE=1 SV=1 - [ANKZ1_HUMAN]	3.99	1	1	1	1					23.05	3.99	1	1	726	80.8772	8.41162
Q8WUM4	Programmed cell death 6-interacting protein OS=Homo sapiens GN=PDCD6IP PE=1 SV=1 - [PDC6I_HUMAN]	1.5	1	1	1	1					22.48	1.5	1	1	868	95.9631	6.52197
O60884	DnaJ homolog subfamily A member 2 OS=Homo sapiens GN=DNAJA2 PE=1 SV=1 - [DNJA2_HUMAN]	3.64	1	1	1	1					22.36	3.64	1	1	412	45.7166	6.48096
Q05519	Serine/arginine-rich splicing factor 11 OS=Homo sapiens GN=SRSF11 PE=1 SV=1 - [SRS11_HUMAN]	3.51	1	1	1	1					21.96	3.51	1	1	484	53.5102	10.521
Q9UL46	Proteasome activator complex subunit 2 OS=Homo sapiens GN=PSME2 PE=1 SV=4 - [PSME2_HUMAN]	3.77	1	1	1	1					21.61	3.77	1	1	239	27.3843	5.73193
Q9NPJ8	NTF2-related export protein 2 OS=Homo sapiens GN=NXT2 PE=2 SV=1 - [NXT2_HUMAN]	10.56	1	1	1	1					21.35	10.56	1	1	142	16.2179	5.47803

## Sheet: E-20 and N-20
Accession	Description	ΣCoverage	Σ# Proteins	Σ# Unique Peptides	Σ# Peptides	Σ# PSMs	Score E20(Rep1)	Coverage E20(Rep1)	# Peptides E20(Rep1)	# PSM E20(Rep1)	Score E20(Rep2)	Coverage E20(Rep2)	# Peptides E20(Rep2)	# PSM E20(Rep2)	Score N20(Rep1)	Coverage N20(Rep1)	# Peptides N20(Rep1)	# PSM N20(Rep1)	Score N20(Rep2)	Coverage N20(Rep2)	# Peptides N20(Rep2)	# PSM N20(Rep2)	# AAs	MW [kDa]	calc. pI
Q13263	Transcription intermediary factor 1-beta OS=Homo sapiens GN=TRIM28 PE=1 SV=5 - [TIF1B_HUMAN]	27.54	1	17	17	56	476.721	13.29	10	16	262.171	17.6	9	16	256.789	22.51	13	15	187.986	13.65	8	9	835	88.4934	5.77002
P22736	Nuclear receptor subfamily 4 group A member 1 OS=Homo sapiens GN=NR4A1 PE=1 SV=1 - [NR4A1_HUMAN]	22.41	3	10	12	60	379.463	13.04	7	17	260.307	13.04	8	13	271.295	12.37	6	14	254.266	17.22	9	16	598	64.4222	7.1665
Q16576	Histone-binding protein RBBP7 OS=Homo sapiens GN=RBBP7 PE=1 SV=1 - [RBBP7_HUMAN]	23.06	1	3	7	25	358.581	20.71	6	13	157.283	13.65	4	7	59.0491	7.29	3	3	33.2255	4.94	2	2	425	47.7902	5.04639
P12956	X-ray repair cross-complementing protein 6 OS=Homo sapiens GN=XRCC6 PE=1 SV=2 - [XRCC6_HUMAN]	29.89	1	13	13	39	418.532	20.03	9	18	143.74	11.33	5	7	75.1447	13.96	6	8	120.402	11.99	5	6	609	69.7991	6.63916
P13010	X-ray repair cross-complementing protein 5 OS=Homo sapiens GN=XRCC5 PE=1 SV=3 - [XRCC5_HUMAN]	18.03	1	13	13	27	310.332	13.93	9	14	137.104	9.56	5	7	47.0143	4.23	3	3	53.0643	3.96	3	3	732	82.6523	5.80811
P62995	Transformer-2 protein homolog beta OS=Homo sapiens GN=TRA2B PE=1 SV=1 - [TRA2B_HUMAN]	12.85	1	3	3	12	60.87	4.86	1	1	130.91	10.42	2	5	25.9	4.86	1	1	114.928	12.85	3	5	288	33.6456	11.2534
Q7L014	Probable ATP-dependent RNA helicase DDX46 OS=Homo sapiens GN=DDX46 PE=1 SV=2 - [DDX46_HUMAN]	15.52	1	12	13	30	320.947	7.47	6	13	130.537	5.24	4	6	92.17	2.33	2	2	173.198	7.86	7	9	1031	117.29	9.29053
P09874	Poly [ADP-ribose] polymerase 1 OS=Homo sapiens GN=PARP1 PE=1 SV=4 - [PARP1_HUMAN]	24.85	1	19	20	59	849.037	21.7	16	38	121.114	7.1	5	7	192.378	6.51	6	6	163.992	9.07	8	8	1014	113.012	8.88037
Q14103	Heterogeneous nuclear ribonucleoprotein D0 OS=Homo sapiens GN=HNRNPD PE=1 SV=1 - [HNRPD_HUMAN]	35.49	1	12	14	58	289.301	12.11	5	10	116.747	12.11	4	5	253.35	22.54	6	10	759.483	27.61	11	33	355	38.4103	7.81104
P09429	High mobility group protein B1 OS=Homo sapiens GN=HMGB1 PE=1 SV=3 - [HMGB1_HUMAN]	22.33	2	5	5	27	287.56	21.86	4	14	111.914	22.33	5	9	44.93	6.98	1	1	52.0495	13.02	2	3	215	24.8782	5.74463
P29401	Transketolase OS=Homo sapiens GN=TKT PE=1 SV=3 - [TKT_HUMAN]	18.3	1	7	7	13	142.78	7.06	2	4	94.81	10.75	3	4	36.8731	2.73	2	2	74.54	4.98	2	3	623	67.8347	7.66455
P78527	DNA-dependent protein kinase catalytic subunit OS=Homo sapiens GN=PRKDC PE=1 SV=3 - [PRKDC_HUMAN]	5.04	1	16	16	21	165.722	1.43	5	7	89.18	1.65	3	3	91.3075	1.87	8	8	66.66	0.82	3	3	4128	468.788	7.12256
O14979	Heterogeneous nuclear ribonucleoprotein D-like OS=Homo sapiens GN=HNRPDL PE=1 SV=3 - [HNRDL_HUMAN]	24.05	1	9	10	31	176.442	6.67	3	6	86.8034	15	4	6	96.2902	15.95	4	5	283.399	19.52	8	14	420	46.4091	9.56885
Q09028	Histone-binding protein RBBP4 OS=Homo sapiens GN=RBBP4 PE=1 SV=3 - [RBBP4_HUMAN]	15.06	1	1	5	15	267.544	15.06	5	8	83.5233	11.29	3	3	55.1955	4.94	2	2	33.2255	4.94	2	2	425	47.6261	4.89404
P13639	Elongation factor 2 OS=Homo sapiens GN=EEF2 PE=1 SV=4 - [EF2_HUMAN]	18.18	1	12	14	32	358.235	9.56	6	14	81.4685	6.53	4	6	89.7855	6.18	6	7	72.47	5.94	5	5	858	95.277	6.82959
P32119	Peroxiredoxin-2 OS=Homo sapiens GN=PRDX2 PE=1 SV=5 - [PRDX2_HUMAN]	32.83	1	7	8	24	131.906	18.18	4	8	80.68	9.09	2	2	130.985	27.27	7	8	103.158	28.28	5	6	198	21.8782	5.97314
Q96I24	Far upstream element-binding protein 3 OS=Homo sapiens GN=FUBP3 PE=1 SV=2 - [FUBP3_HUMAN]	41.78	1	15	19	41	138.488	9.97	4	7	80.4613	12.24	4	5	183.515	26.22	11	12	337.429	25.35	12	17	572	61.6022	8.38232
P46063	ATP-dependent DNA helicase Q1 OS=Homo sapiens GN=RECQL PE=1 SV=3 - [RECQ1_HUMAN]	17.57	1	9	9	26	267.828	12.02	6	13	79.0357	6.16	3	5	167.355	7.4	4	4	92.71	7.09	4	4	649	73.41	7.88428
P27694	Replication protein A 70 kDa DNA-binding subunit OS=Homo sapiens GN=RPA1 PE=1 SV=2 - [RFA1_HUMAN]	20.45	1	8	8	13	144.48	7.63	3	5	77.3967	5.03	2	3	56.2883	5.03	2	2	59.361	8.6	3	3	616	68.0953	7.21045
P31948	Stress-induced-phosphoprotein 1 OS=Homo sapiens GN=STIP1 PE=1 SV=1 - [STIP1_HUMAN]	10.87	1	5	5	11	57.56	1.84	1	1	71.72	1.84	1	2	82.5609	9.02	4	4	53.63	7.73	4	4	543	62.5994	6.80029
P06748	Nucleophosmin OS=Homo sapiens GN=NPM1 PE=1 SV=2 - [NPM_HUMAN]	34.01	1	8	8	19	128.777	13.61	3	7	71.6326	9.52	1	3	151.359	31.29	6	7	43.7611	11.9	2	2	294	32.5548	4.77979
P26368	Splicing factor U2AF 65 kDa subunit OS=Homo sapiens GN=U2AF2 PE=1 SV=4 - [U2AF2_HUMAN]	21.47	1	6	7	17	68.1443	6.95	1	3	71.2006	9.05	2	4	81.3533	8.42	4	5	86.7706	10.74	4	5	475	53.4672	9.08545
P31689	DnaJ homolog subfamily A member 1 OS=Homo sapiens GN=DNAJA1 PE=1 SV=2 - [DNJA1_HUMAN]	34.01	3	10	10	17	105.48	19.14	5	8	64.8765	12.09	4	6	65.76	9.32	2	2	23.29	5.54	1	1	397	44.8395	7.07861
P25205	DNA replication licensing factor MCM3 OS=Homo sapiens GN=MCM3 PE=1 SV=3 - [MCM3_HUMAN]	22.77	1	12	13	25	203.51	9.28	5	7	64.0167	3.47	2	3	155.806	9.16	6	8	98.9067	10.4	6	7	808	90.924	5.77002
P07737	Profilin-1 OS=Homo sapiens GN=PFN1 PE=1 SV=2 - [PROF1_HUMAN]	36.43	1	5	5	24	360.156	36.43	5	11	63.68	18.57	2	2	100.838	28.57	3	4	207.913	34.29	4	7	140	15.0446	8.26514
P43354	Nuclear receptor subfamily 4 group A member 2 OS=Homo sapiens GN=NR4A2 PE=1 SV=1 - [NR4A2_HUMAN]	24.08	3	7	9	33	171.97	9.87	5	8	62.8021	10.37	4	6	93.2201	11.04	5	7	132.546	17.22	7	12	598	66.5479	7.92822
O14929	Histone acetyltransferase type B catalytic subunit OS=Homo sapiens GN=HAT1 PE=1 SV=1 - [HAT1_HUMAN]	9.31	1	3	3	8	21.81	1.91	1	1	62.2433	3.1	1	3	82.16	7.4	2	2	112.68	7.4	2	2	419	49.4808	5.69385
P11940	Polyadenylate-binding protein 1 OS=Homo sapiens GN=PABPC1 PE=1 SV=2 - [PABP1_HUMAN]	23.74	4	10	14	27	71.2488	3.93	2	4	61.8447	6.76	3	4	76.1382	7.08	4	4	324.392	20.13	12	15	636	70.6259	9.49561
Q92570	Nuclear receptor subfamily 4 group A member 3 OS=Homo sapiens GN=NR4A3 PE=2 SV=3 - [NR4A3_HUMAN]	6.87	3	4	5	15	138.471	5.27	4	7	57.8887	3.67	3	3	32.58	1.6	1	1	71.0709	3.83	3	4	626	68.1862	7.81104
P10768	S-formylglutathione hydrolase OS=Homo sapiens GN=ESD PE=1 SV=2 - [ESTD_HUMAN]	12.06	1	2	2	7	22.06	7.8	1	1	56.5064	7.8	1	3	38.32	4.26	1	2	44.43	7.8	1	1	282	31.4425	7.02002
Q13310	Polyadenylate-binding protein 4 OS=Homo sapiens GN=PABPC4 PE=1 SV=1 - [PABP4_HUMAN]	9.01	1	1	5	13	26.64	1.55	1	1	55.9364	4.35	2	3	53.5265	4.19	2	2	155.735	9.01	5	7	644	70.7381	9.26123
Q9NRX4	14 kDa phosphohistidine phosphatase OS=Homo sapiens GN=PHPT1 PE=1 SV=1 - [PHP14_HUMAN]	37.6	1	3	3	10	34.36	16.8	1	1	54.51	37.6	3	5	29.57	12	1	2	54.61	12	1	2	125	13.8237	6.07471
P39748	Flap endonuclease 1 OS=Homo sapiens GN=FEN1 PE=1 SV=1 - [FEN1_HUMAN]	22.11	1	5	7	13	103.33	8.16	2	4	54.3298	8.16	2	2	69.2325	14.47	4	4	53.718	8.16	3	3	380	42.5661	8.6167
Q07020	60S ribosomal protein L18 OS=Homo sapiens GN=RPL18 PE=1 SV=2 - [RL18_HUMAN]	28.19	1	5	5	14	169.124	6.91	1	3	52.55	6.91	1	2	111.538	22.87	4	4	218.662	19.15	3	5	188	21.6211	11.7222
P42166	Lamina-associated polypeptide 2, isoform alpha OS=Homo sapiens GN=TMPO PE=1 SV=2 - [LAP2A_HUMAN]	12.39	2	5	5	8	61.8046	5.19	2	3	51.05	3.75	1	2	52.95	3.46	2	2	56.09	1.59	1	1	694	75.4456	7.66455
Q16629	Serine/arginine-rich splicing factor 7 OS=Homo sapiens GN=SRSF7 PE=1 SV=1 - [SRSF7_HUMAN]	22.27	1	5	6	21	169.17	8.82	2	5	50.9367	8.82	2	3	75.2751	14.71	3	4	260.198	19.33	5	9	238	27.35	11.8247
O43684	Mitotic checkpoint protein BUB3 OS=Homo sapiens GN=BUB3 PE=1 SV=1 - [BUB3_HUMAN]	22.56	1	6	6	19	66.6732	8.23	2	4	49.9915	6.1	1	4	66.1817	18.29	5	5	97.77	15.55	4	6	328	37.1312	6.84424
P23528	Cofilin-1 OS=Homo sapiens GN=CFL1 PE=1 SV=3 - [COF1_HUMAN]	42.17	1	2	4	17	372.699	42.17	4	8	49.17	18.67	2	2	70.1167	33.73	3	3	71.43	31.93	3	4	166	18.4907	8.08936
P63104	14-3-3 protein zeta/delta OS=Homo sapiens GN=YWHAZ PE=1 SV=1 - [1433Z_HUMAN]	35.92	2	4	7	13	105.888	7.76	1	2	48.75	7.35	1	2	114.23	12.65	3	3	138.155	20.82	5	6	245	27.7277	4.79248
Q13162	Peroxiredoxin-4 OS=Homo sapiens GN=PRDX4 PE=1 SV=1 - [PRDX4_HUMAN]	17.71	1	2	4	11	96.1417	15.13	3	5	48.2467	8.12	2	3	47.9188	5.54	2	2	28.46	2.95	1	1	271	30.5208	6.29053
P08107	Heat shock 70 kDa protein 1A/1B OS=Homo sapiens GN=HSPA1A PE=1 SV=5 - [HSP71_HUMAN]	14.66	3	6	8	21	283.893	5.93	3	9	48.2	1.87	1	1	126.25	9.2	5	5	105.731	11.08	6	6	641	70.009	5.65576
Q99873	Protein arginine N-methyltransferase 1 OS=Homo sapiens GN=PRMT1 PE=1 SV=2 - [ANM1_HUMAN]	26.59	1	9	9	26	335.018	22.99	7	19	47.81	3.6	1	2	44.45	6.37	2	2	46.3367	7.48	2	3	361	41.4885	5.42725
P18085	ADP-ribosylation factor 4 OS=Homo sapiens GN=ARF4 PE=1 SV=3 - [ARF4_HUMAN]	32.22	1	3	5	8	38.17	6.11	1	1	47.4003	16.67	2	2	50.233	9.44	2	2	50.4314	11.11	2	3	180	20.4977	7.13721
Q9Y5B9	FACT complex subunit SPT16 OS=Homo sapiens GN=SUPT16H PE=1 SV=1 - [SP16H_HUMAN]	6.69	1	4	4	8	98.1455	3.34	2	3	46.2535	3.72	2	3	24.94	1.43	1	1	24.02	1.43	1	1	1047	119.838	5.65576
O14980	Exportin-1 OS=Homo sapiens GN=XPO1 PE=1 SV=1 - [XPO1_HUMAN]	7.1	1	4	5	9	142.18	4.39	3	5	45.08	2.61	2	2	25.87	1.03	1	1	28.57	1.68	1	1	1071	123.306	6.06201
P30041	Peroxiredoxin-6 OS=Homo sapiens GN=PRDX6 PE=1 SV=3 - [PRDX6_HUMAN]	37.95	1	6	6	15	170.003	28.57	5	10	44.9224	11.61	2	2	31.9357	14.29	2	2	41.9	4.02	1	1	224	25.0192	6.37939
P33992	DNA replication licensing factor MCM5 OS=Homo sapiens GN=MCM5 PE=1 SV=5 - [MCM5_HUMAN]	14.44	1	7	7	15	104.323	8.31	4	9	43.6322	6.68	3	3	40.5	3.54	2	2	29.4	1.77	1	1	734	82.2332	8.36768
P62258	14-3-3 protein epsilon OS=Homo sapiens GN=YWHAE PE=1 SV=1 - [1433E_HUMAN]	41.57	2	6	9	14	50.06	12.94	2	2	43.39	11.76	2	3	178.19	23.14	5	5	87.4805	9.8	3	4	255	29.1554	4.7417
O75643	U5 small nuclear ribonucleoprotein 200 kDa helicase OS=Homo sapiens GN=SNRNP200 PE=1 SV=2 - [U520_HUMAN]	10.16	1	16	16	25	302.134	6.37	10	16	41.2103	1.73	3	3	84.88	2.76	4	5	24.2	0.42	1	1	2136	244.353	6.06201
Q15365	Poly(rC)-binding protein 1 OS=Homo sapiens GN=PCBP1 PE=1 SV=2 - [PCBP1_HUMAN]	31.74	3	5	10	37	53.2519	10.67	2	2	40.87	5.62	1	2	246.3	22.19	8	11	527.572	30.34	9	22	356	37.4739	7.09326
Q12906	Interleukin enhancer-binding factor 3 OS=Homo sapiens GN=ILF3 PE=1 SV=3 - [ILF3_HUMAN]	34.79	2	18	19	37	38.26	1.12	1	1	40.87	1.23	1	2	221.985	19.57	12	15	324.005	31.21	16	19	894	95.2791	8.76318
P28482	Mitogen-activated protein kinase 1 OS=Homo sapiens GN=MAPK1 PE=1 SV=3 - [MK01_HUMAN]	16.94	2	5	5	13	61.26	3.06	1	5	40.4024	8.33	2	2	44.7911	8.61	3	3	56.0867	5.56	2	3	360	41.3632	6.97607
P21333	Filamin-A OS=Homo sapiens GN=FLNA PE=1 SV=4 - [FLNA_HUMAN]	10.8	3	20	21	25	46.4933	1.59	3	3	38.242	1.78	3	3	155.971	5.36	11	11	173.43	3.55	7	8	2647	280.564	6.06201
P16152	Carbonyl reductase [NADPH] 1 OS=Homo sapiens GN=CBR1 PE=1 SV=3 - [CBR1_HUMAN]	22.38	2	4	4	9	74.903	4.69	1	3	37.7249	15.52	2	2	0	2.89	1	1	71.9466	17.69	3	3	277	30.3559	8.32373
P19338	Nucleolin OS=Homo sapiens GN=NCL PE=1 SV=3 - [NUCL_HUMAN]	23.52	1	15	15	26	120.791	9.44	4	4	37.49	3.1	1	1	192.447	18.03	10	10	176.238	14.37	10	11	710	76.5684	4.70361
P51532	Transcription activator BRG1 OS=Homo sapiens GN=SMARCA4 PE=1 SV=2 - [SMCA4_HUMAN]	5.4	2	7	7	9	62.5867	1.7	2	3	37.45	1.4	2	2	43.1465	2.31	3	3	23.76	0.43	1	1	1647	184.53	7.88428
P62826	GTP-binding nuclear protein Ran OS=Homo sapiens GN=RAN PE=1 SV=3 - [RAN_HUMAN]	18.52	1	4	4	9	67.14	4.63	1	2	37.26	5.09	1	1	36.4388	8.8	2	2	70.8663	18.52	4	4	216	24.4076	7.48877
Q9Y281	Cofilin-2 OS=Homo sapiens GN=CFL2 PE=1 SV=1 - [COF2_HUMAN]	28.92	1	1	3	9	126.505	16.87	2	4	37.23	10.24	1	1	56.9433	28.92	3	3	41.18	6.63	1	1	166	18.7249	7.88428
Q02790	Peptidyl-prolyl cis-trans isomerase FKBP4 OS=Homo sapiens GN=FKBP4 PE=1 SV=3 - [FKBP4_HUMAN]	21.35	1	6	6	9	55.6774	10.46	3	5	34.14	7.41	2	2	24.96	2.83	1	1	37.17	3.7	1	1	459	51.7721	5.42725
Q9UKN8	General transcription factor 3C polypeptide 4 OS=Homo sapiens GN=GTF3C4 PE=1 SV=2 - [TF3C4_HUMAN]	6.69	1	3	4	10	41.3398	2.8	2	3	34.04	1.95	1	1	26.9179	2.55	2	2	54.0455	2.55	2	4	822	91.9235	6.65381
P62913	60S ribosomal protein L11 OS=Homo sapiens GN=RPL11 PE=1 SV=2 - [RL11_HUMAN]	12.92	1	2	2	6	75.57	7.87	1	1	33.72	7.87	1	1	75.53	7.87	1	1	66.6033	12.92	2	3	178	20.2396	9.59814
P53999	Activated RNA polymerase II transcriptional coactivator p15 OS=Homo sapiens GN=SUB1 PE=1 SV=3 - [TCP4_HUMAN]	42.52	1	6	6	16	128.258	11.02	2	6	32.82	19.69	2	2	36.7408	11.81	2	2	139.195	30.71	4	6	127	14.3864	9.59814
P11388	DNA topoisomerase 2-alpha OS=Homo sapiens GN=TOP2A PE=1 SV=3 - [TOP2A_HUMAN]	3.98	1	3	5	8	50.361	1.63	2	3	32.41	0.85	1	1	51.64	1.63	2	2	26.24	1.63	2	2	1531	174.276	8.71924
Q07955	Serine/arginine-rich splicing factor 1 OS=Homo sapiens GN=SRSF1 PE=1 SV=2 - [SRSF1_HUMAN]	39.52	1	10	10	32	47.89	4.03	1	1	32.3	4.03	1	1	170.878	35.89	9	11	371.731	39.52	10	19	248	27.7278	10.3599
Q15717	ELAV-like protein 1 OS=Homo sapiens GN=ELAVL1 PE=1 SV=2 - [ELAV1_HUMAN]	35.28	1	9	10	27	59.13	3.99	1	1	31.61	3.99	1	2	251.87	19.63	6	9	385.023	35.28	10	15	326	36.0692	9.17334
P16949	Stathmin OS=Homo sapiens GN=STMN1 PE=1 SV=3 - [STMN1_HUMAN]	42.28	2	5	6	9	89.6366	8.72	1	2	31.17	9.4	1	1	38.0879	18.79	3	3	52.69	20.81	3	3	149	17.292	5.97314
P60660	Myosin light polypeptide 6 OS=Homo sapiens GN=MYL6 PE=1 SV=2 - [MYL6_HUMAN]	40.4	2	5	5	15	149.954	26.49	3	8	30.6	10.6	1	1	66.46	23.84	3	3	49.4869	14.57	2	3	151	16.9191	4.65283
P09012	U1 small nuclear ribonucleoprotein A OS=Homo sapiens GN=SNRPA PE=1 SV=3 - [SNRPA_HUMAN]	15.25	2	3	4	9	46.05	6.38	1	1	30.3	6.38	1	2	42.0132	6.38	2	2	60.1035	11.7	3	4	282	31.2592	9.83252
Q14980	Nuclear mitotic apparatus protein 1 OS=Homo sapiens GN=NUMA1 PE=1 SV=2 - [NUMA1_HUMAN]	8.13	1	11	12	16	56.71	1.47	2	2	30.01	1.65	2	2	213.257	4.73	7	8	58.2186	2.74	4	4	2115	238.115	5.78271
Q66PJ3	ADP-ribosylation factor-like protein 6-interacting protein 4 OS=Homo sapiens GN=ARL6IP4 PE=1 SV=2 - [AR6P4_HUMAN]	12.35	1	4	4	10	122.906	8.55	2	5	29.66	4.51	1	2	32.04	3.8	1	1	51.46	3.8	1	2	421	44.8882	10.9312
P27635	60S ribosomal protein L10 OS=Homo sapiens GN=RPL10 PE=1 SV=4 - [RL10_HUMAN]	9.35	2	3	3	5	26.497	9.35	2	2	29.61	6.07	1	1	55.94	6.07	1	1	49.34	6.07	1	1	214	24.5879	10.0815
P06493	Cyclin-dependent kinase 1 OS=Homo sapiens GN=CDK1 PE=1 SV=3 - [CDK1_HUMAN]	20.88	26	4	5	13	130.03	11.78	3	6	29.51	5.39	1	1	79.4976	6.4	2	3	74.0596	11.45	3	3	297	34.0739	8.39697
O43395	U4/U6 small nuclear ribonucleoprotein Prp3 OS=Homo sapiens GN=PRPF3 PE=1 SV=2 - [PRPF3_HUMAN]	12.01	1	6	7	10	109.539	6.44	3	5	28.91	1.9	1	1	49.0733	4.54	3	3	21.06	1.02	1	1	683	77.4809	9.49561
Q15233	Non-POU domain-containing octamer-binding protein OS=Homo sapiens GN=NONO PE=1 SV=4 - [NONO_HUMAN]	46.28	2	21	25	107	214.58	10.19	6	10	27.7257	4.88	2	2	675.491	33.97	15	29	979.378	46.28	23	66	471	54.1973	8.95361
P07195	L-lactate dehydrogenase B chain OS=Homo sapiens GN=LDHB PE=1 SV=2 - [LDHB_HUMAN]	20.36	1	5	5	11	180.094	7.78	2	4	27.44	5.09	1	1	106.417	15.27	4	5	29.02	4.79	1	1	334	36.6151	6.04932
P62081	40S ribosomal protein S7 OS=Homo sapiens GN=RPS7 PE=1 SV=1 - [RS7_HUMAN]	17.01	1	2	2	5	98.3239	17.01	2	2	27.08	11.34	1	1	36.52	5.67	1	1	22.78	11.34	1	1	194	22.1133	10.0962
P54920	Alpha-soluble NSF attachment protein OS=Homo sapiens GN=NAPA PE=1 SV=3 - [SNAA_HUMAN]	11.86	1	3	3	6	62.67	4.41	1	1	26.99	4.07	1	1	33.56	7.46	2	2	69.2505	7.46	2	2	295	33.2113	5.36377
Q14683	Structural maintenance of chromosomes protein 1A OS=Homo sapiens GN=SMC1A PE=1 SV=2 - [SMC1A_HUMAN]	6.16	1	6	7	9	83.7613	2.03	2	3	26.9093	1.95	2	3	22.43	0.89	1	1	34.8981	1.3	2	2	1233	143.144	7.63525
Q8WVV9	Heterogeneous nuclear ribonucleoprotein L-like OS=Homo sapiens GN=HNRPLL PE=1 SV=1 - [HNRLL_HUMAN]	16.61	1	6	6	10	102.995	5.72	2	3	26.78	2.95	1	1	30.19	2.95	1	1	109.6	10.89	4	5	542	60.0449	7.72314
P0CG48	Polyubiquitin-C OS=Homo sapiens GN=UBC PE=1 SV=3 - [UBC_HUMAN]	40.73	4	3	3	9	93.4808	32.85	2	3	26.77	11.82	1	1	48.5913	40.73	3	3	30.458	28.91	2	2	685	76.9915	7.66455
Q08J23	tRNA (cytosine(34)-C(5))-methyltransferase OS=Homo sapiens GN=NSUN2 PE=1 SV=2 - [NSUN2_HUMAN]	9	1	5	5	8	37.1048	3.26	2	3	26.64	1.96	1	2	37.71	3.78	2	2	28.06	1.43	1	1	767	86.4158	6.771
P30086	Phosphatidylethanolamine-binding protein 1 OS=Homo sapiens GN=PEBP1 PE=1 SV=3 - [PEBP1_HUMAN]	26.2	1	3	3	13	51.7533	8.02	1	3	26.1	10.7	1	1	110.863	26.2	3	3	174.993	26.2	3	6	187	21.0437	7.53271
Q9NTZ6	RNA-binding protein 12 OS=Homo sapiens GN=RBM12 PE=1 SV=1 - [RBM12_HUMAN]	5.79	1	5	5	6	23.53	0.75	1	1	25.53	1.39	1	1	27.67	1.5	1	1	50.8564	3.65	3	3	932	97.3334	8.63135
P08621	U1 small nuclear ribonucleoprotein 70 kDa OS=Homo sapiens GN=SNRNP70 PE=1 SV=2 - [RU17_HUMAN]	25.86	1	9	10	24	48.3434	6.18	2	3	24.9	6.18	2	2	99.2455	11.44	5	5	197.598	22.2	9	14	437	51.5258	9.93506
P01857	Ig gamma-1 chain C region OS=Homo sapiens GN=IGHG1 PE=1 SV=1 - [IGHG1_HUMAN]	5.76	4	2	2	14	48.5664	2.12	1	5	24.52	2.12	1	1	65.1245	5.76	2	4	67.2523	5.76	2	4	330	36.0832	8.19189
Q96AE4	Far upstream element-binding protein 1 OS=Homo sapiens GN=FUBP1 PE=1 SV=3 - [FUBP1_HUMAN]	42.55	2	16	23	55	40.2773	5.28	2	2	24.39	1.4	1	1	226.243	23.6	15	19	619.775	33.54	18	33	644	67.5185	7.60596
Q9HAV4	Exportin-5 OS=Homo sapiens GN=XPO5 PE=1 SV=1 - [XPO5_HUMAN]	2.08	1	2	2	5	62.1165	1	1	2	24.35	1	1	1	24.41	1.08	1	1	22.57	1.08	1	1	1204	136.222	5.79541
P26583	High mobility group protein B2 OS=Homo sapiens GN=HMGB2 PE=1 SV=2 - [HMGB2_HUMAN]	11.96	1	2	2	7	49.0533	6.7	1	3	23.88	6.7	1	1	20.98	5.26	1	1	45.84	5.26	1	2	209	24.0187	7.81104
Q96E39	RNA binding motif protein, X-linked-like-1 OS=Homo sapiens GN=RBMXL1 PE=1 SV=1 - [RMXL1_HUMAN]	36.41	2	2	15	52	154.216	3.33	1	3	23	4.87	1	2	264.82	22.31	8	11	529.59	36.41	15	36	390	42.1162	9.89111
P63244	Guanine nucleotide-binding protein subunit beta-2-like 1 OS=Homo sapiens GN=GNB2L1 PE=1 SV=3 - [GBLP_HUMAN]	12.3	1	3	3	8	72.6867	5.05	1	3	22.82	3.79	1	1	42.09	7.26	2	2	46.59	8.83	2	2	317	35.0546	7.69385
Q9Y3F4	Serine-threonine kinase receptor-associated protein OS=Homo sapiens GN=STRAP PE=1 SV=1 - [STRAP_HUMAN]	18.29	1	4	4	7	36.14	4.29	1	1	22.04	4.29	1	1	31.5249	8.86	2	2	75.1985	8.86	2	3	350	38.414	5.12256
Q06830	Peroxiredoxin-1 OS=Homo sapiens GN=PRDX1 PE=1 SV=1 - [PRDX1_HUMAN]	32.66	1	4	7	15	133.885	18.09	4	6	22.01	4.02	1	1	47.9188	7.54	2	2	107.751	20.1	4	6	199	22.0963	8.1333
P46783	40S ribosomal protein S10 OS=Homo sapiens GN=RPS10 PE=1 SV=1 - [RS10_HUMAN]	14.55	2	3	3	7	37.96	9.09	1	1	21.6	5.45	1	1	30.94	13.94	2	2	74.064	14.55	2	3	165	18.8859	10.1548
Q92769	Histone deacetylase 2 OS=Homo sapiens GN=HDAC2 PE=1 SV=2 - [HDAC2_HUMAN]	6.35	2	2	2	7	64.4673	2.46	1	3	21.29	3.89	1	1	22.09	2.46	1	1	35.3	2.46	1	2	488	55.3288	5.90967
Q92499	ATP-dependent RNA helicase DDX1 OS=Homo sapiens GN=DDX1 PE=1 SV=2 - [DDX1_HUMAN]	7.7	1	5	5	12	159.669	3.92	2	5	20.6	1.49	1	1	22.61	1.08	1	1	116.605	6.62	4	5	740	82.3798	7.2251
Q02539	Histone H1.1 OS=Homo sapiens GN=HIST1H1A PE=1 SV=3 - [H11_HUMAN]	27.44	2	1	6	14	73.6641	5.12	1	3	20.05	9.3	1	1	86.1758	13.02	4	7	60.1251	10.7	3	3	215	21.8289	10.9897
